# Supplementary material for: A general solid phase method for the synthesis of depsipeptides
Source: Royal Society of Chemistry journal article supplement (doi:10.1039/c2ob26893k), 2013-01-01

**Supplemental Information for “A general solid phase method for the synthesis of depsipeptides”**

**Mary M Nguyen, Nicole Ong and Laura Suggs\***<sup>a</sup>

Contents:

Experimental Methods

H-NMR and C-NMR of Fmoc-Asp-Lac-Bn, Fmoc-Asp-Lac-OH, Fmoc-Lys-Lac-Bn, and Fmoc-Lys-Lac-OH

LC/MS and ESI/MS of Fmoc-Asp-Lac-Bn, Fmoc-Asp-Lac-OH, Fmoc-Lys-Lac-Bn, and Fmoc-Lys-Lac-OH

HPLC of Fmoc-K-Lac-A-8, Fmoc-K-Lac-A-16, Fmoc-K-Lac-D-A-8, Fmoc-D-Lac-K-A-8

## Experimental section

### General experimental information

Abbreviations: Boc: tert-butyloxycarbonyl; OtBu: tert-butyl; Bn: benzyl; DCC, N,N'-Dicyclohexylcarbodiimide; DCM, dichloromethane; DMAP, 4-Dimethylaminopyridine; DMF, dimethylformamide; DIC, N,N'-Diisopropylcarbodiimide; DIPEA, N,N-diisopropylethylamine; Fmoc, 9-Fluorenylmethyloxycarbonyl; HPLC, high pressure liquid chromatography; Lac, lactic acid; Pd/C, palladium on carbon; Pfp, pentafluorophenol; TFA, trifluoroacetic acid. TFA, DCM, DMF, ethyl acetate, and diethyl ether were from Fisher Scientific. DIPEA, Pfp, and R-mandelic acid were from Acros Organics. Pd/C was purchased from Aldrich. Fmoc-amino acids, DMAP, and OxymaPure were purchased from EMD Biosciences. The side chain protecting groups were chosen as: Boc or Z for lysine and OtBu or OBzl for aspartic acid. Trityl chloride resin, Fmoc-Ala-Wang resin, and DIC were from Anaspec. Piperidine was from Alfa Aesar. L-lactic acid was from Biosynth.

Analytical thin layer chromatography (TLC) was performed on Whatman aluminum backed silica plates (UV<sub>254</sub>, 250 μm). Spots were visualized with UV light or a permanganate potassium stain. Column chromatography was performed manually on silica gel (230-400 mesh size, grade 60). <sup>1</sup>H-NMR, <sup>13</sup>C-NMR, and two dimensional spectra were obtained on a Varian 500 MHz and 500 MHz spectrometers. Chemical shifts are given in ppm with respect to internal standard TMS for <sup>1</sup>H-NMR and <sup>13</sup>C-NMR. Analytical HPLC was performed using an automatic HPLC system (Beckman System Gold) with an analytical reversed-phase column, an UV detector operating at 214 nm, at a flow rate of 1 mL/min. A Vydac C18 column (300 Å, 5 μm, 3.1 x 150 mm) was used. Preparative HPLC was performed using a GE Biosciences AKTA 10 system on a Biorad HiPore RP C18 column (300 Å, 5 μm, 3.1 x 150 mm), an UV detector operating at 214 nm. The depsipeptides were characterized using liquid chromatography mass spectroscopy (LC-MS) and electrospray mass spectrometry (ESI-MS). They were performed on an Agilent 1200 series HPLC, a Agilent 6130 single quadrupole mass spectrometer or a Gemini column (C18, 55 μm, 2.1 x 50 mm), operating in a positive or negative ionization mode.

### Synthesis of Fmoc-Asp(OtBu)-Lac-Bn (3a)

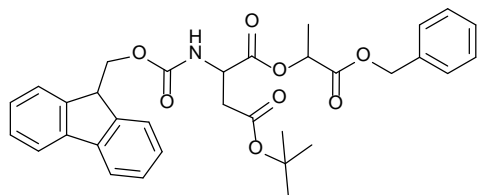

Fmoc-Asp(OtBu)-OH (1.2 mmol) and Lac-Bn<sup>1</sup> (1.0 mmol) was dissolved in DCM and placed on an ice bath. DIC (1.2 mmol) and DMAP (0.01 mmol) was added to the cold mixture and mixed for 1 hour. The reaction was stirred for 5 hours at room temperature and monitored by TLC. The solution was filtered and concentrated. The crude oil was purified on silica gel hexanes and ethyl acetate (67%). <sup>1</sup>H-NMR (500 MHz, d<sub>6</sub>-DMSO) δ (ppm): 1.33-1.43 (m, 12H), 2.58 and 2.78 [dd, *J* = 4.76, 2H, CH<sub>2</sub>CH<sub>2</sub>CO], 4.24 [t, *J* = 6.83, 1H, CH(Fmoc)], 4.34 [d, *J* = 6.66, 2H, CH<sub>2</sub>(Fmoc)], 4.54 [m, *J* = 4.76, 1H, NHCHCH<sub>2</sub>], 7.32-7.44 (m, 9H), 7.70 [q, *J* = 7.07, 2H, H<sub>Ar</sub>(Fmoc)], 7.89 [d, *J* = 7.51, 2H, H<sub>Ar</sub>(Fmoc)], 7.96 [d, *J* = 8.24, 1H, NH]; <sup>13</sup>C-NMR (125 MHz, d<sub>6</sub>-DMSO) δ (ppm): 170.77, 169.90, 168.75, 155.00, 143.74, 140.79, 135.50, 128.51, 128.26, 127.90, 127.87, 127.10, 125.18, 120.15, 80.63, 69.09, 66.44, 65.84, 50.43, 46.63, 36.81, 27.66, 16.59. MS (ESI+) calculated for C<sub>33</sub>H<sub>35</sub>NO<sub>8</sub> [M<sup>+</sup> - OtBu - H]: 517.53; found: 518.00

### Synthesis of Fmoc-Lys(Boc)-Lac-Bn (3b)

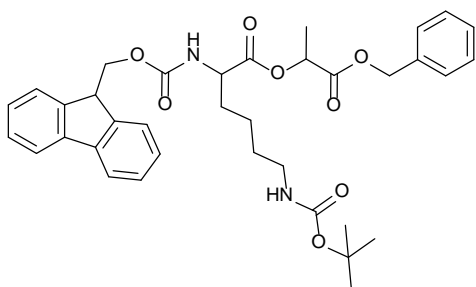

Fmoc-Lys(Boc)-OH (1.2 mmol) and Lac-Bn<sup>1</sup> (1.0 mmol) was dissolved in DCM and placed in an ice bath. DIC (1.2 mmol) and DMAP (0.01 mmol) was added to the cold mixture and mixed for 1 hour. The reaction was stirred for 5 hours at room temperature and monitored by TLC. Diisocarbonylurea was removed via filtration, and the mixture was concentrated. The crude oil was purified on silica gel with 37.5% EtOAc in hexanes (82%). <sup>1</sup>H-NMR (500 MHz, d<sub>6</sub>-DMSO) δ (ppm): 1.24-1.45 (m, 16H), 1.56-1.73 (m, 2H), 2.88 [t, *J* = 5.13, 2H, CH<sub>2</sub>CH<sub>2</sub>NH], 4.04 [m, *J* = 7.07, 1H, NHCHCH<sub>2</sub>CO], 4.21-4.32 (m, 3H), 5.10-5.15 (m, 3H), 6.75 [t, *J* = 5.61, 1H, NH], 7.31-7.45 (m, 9H), 7.71 [d, *J* = 7.57, 2H, H<sub>Ar</sub>(Fmoc)], 7.79 [d, *J* = 7.56, 1H, NH], 7.89 [d, *J* = 7.56, 2H, H<sub>Ar</sub>(Fmoc)]; <sup>13</sup>C-NMR (125 MHz, d<sub>6</sub>-DMSO) δ (ppm): 172.06, 169.96, 156.12, 155.54, 143.73, 140.68, 135.44, 128.43, 128.17, 127.90, 127.61, 127.02, 125.19, 120.08, 77.32, 68.66, 66.31, 65.67, 53.58, 46.58, 40.09, 30.15, 28.99, 28.23, 22.77, 16.63. MS (ESI-) calculated for C<sub>36</sub>H<sub>42</sub>N<sub>2</sub>O<sub>8</sub> [M<sup>-</sup> - H]: 630.73; found: 629.8

### Synthesis of Fmoc-Asp(OtBu)-Lac-OH (4c)

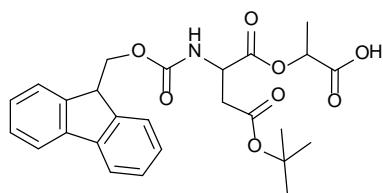

(3a) was dissolved in dry methanol with 0.1 equiv Pd/C under H<sub>2</sub> at 5 psi for 8 hours or as monitored with TLC. The Pd/C was filtered through a pad of celite and concentrated in vacuo. The sample was purified on silica gel with 1% MeOH in DCM to yield 4c as white crystals (33%). <sup>1</sup>H-NMR (500 MHz, d<sub>6</sub>-DMSO) δ (ppm): 1.36-1.38 (m, 12H), 2.55 and 2.79 [dd, *J* = 4.64, 2H, CH<sub>2</sub>CH<sub>2</sub>CO], 4.22 [t, *J* = 7.08, 1H, CH(Fmoc)], 4.30 [d, *J* = 7.07, 2H, CH<sub>2</sub>(Fmoc)], 4.93 [q, *J* = 7.07, 1H, NHCHCH<sub>2</sub>], 7.31 [t, *J* = 7.32, 2H, H<sub>Ar</sub>(Fmoc)], 7.41 [t, *J* = 7.33, 2H, H<sub>Ar</sub>(Fmoc)], 7.68 [t, *J* = 7.08, 2H, H<sub>Ar</sub>(Fmoc)], 7.87-7.89 (d, 3H); <sup>13</sup>C-NMR (125 MHz, d<sub>6</sub>-DMSO) δ (ppm): 171.44, 170.64, 168.74, 155.79, 143.69, 140.68, 127.60, 127.01, 125.12, 120.09, 80.49, 69.05, 65.70, 50.33, 46.52, 36.74, 27.61, 16.62 (shift at 54.86 ppm is residual DCM). MS (ESI-) calculated for C<sub>26</sub>H<sub>29</sub>NO<sub>8</sub> [M<sup>-</sup> - H]: 483.51; found: 482.2

#### Synthesis of Fmoc-Lys(Boc)-Lac-OH (4d)

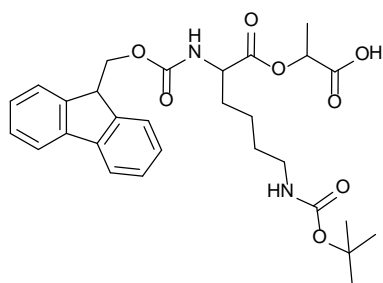

(3b) was dissolved in dry methanol with 0.1 equiv Pd/C under H<sub>2</sub> at 12 psi for 9 hours or as monitored with TLC. The Pd/C was filtered through a pad of celite and concentrated in vacuo. The sample was eluted with 1-6% MeOH in DCM to yield 4d as white crystals in a yield of (67%). <sup>1</sup>H-NMR (500 MHz, d<sub>6</sub>-DMSO) δ (ppm): 1.34-1.47 (m, 16H), 1.60-1.79 (m, 2H), 2.90 [t, *J* = 5.96, 2H, CH<sub>2</sub>CH<sub>2</sub>NH], 4.04 [m, *J* = 5.03, 1H, NHCHCH<sub>2</sub>CO], 4.32-4.22 (m, 3H), 4.93 [q, *J* = 7.07, 1H, CH<sub>2</sub>CHCH<sub>3</sub>], 6.75 [t, *J* = 5.53, 1H, NH], 7.33 [t, *J* = 7.49, 2H, H<sub>Ar</sub>(Fmoc)]; 7.42 [t, *J* = 7.50, 2H, H<sub>Ar</sub>(Fmoc)], 7.72 [t, *J* = 6.90, 2H, H<sub>Ar</sub>(Fmoc)], 7.77 [d, *J* = 7.83, 1H, NH], 7.89 [d, *J* = 7.50, 2H, H<sub>Ar</sub>(Fmoc)]; <sup>13</sup>C-NMR (125 MHz, d<sub>6</sub>-DMSO) δ (ppm): 171.91, 171.84, 156.05, 155.47, 143.69, 140.62, 127.54, 126.96, 125.15, 120.01, 77.25, 68.59, 65.60, 53.52, 46.53, 30.12, 28.98, 28.18, 22.72, 16.63. MS (ESI-) calculated for C<sub>29</sub>H<sub>36</sub>N<sub>2</sub>O<sub>8</sub> [M<sup>-</sup> - H]: 540.60; found: 539.00

#### General procedure for the removal of protecting groups for solid phase synthesis

The Fmoc-protecting group was removed from the N-terminus with 20% piperidine in DMF. The solution was mixed for 5 minutes three times. The resin was washed with DMF. Cleavage of butyl-groups was investigated using the following cocktails: A: TFA/TIPS – 95/5; B: TFA/Water/TIPS – 95/2/3; C: TFA/DCM/TIPS – 95/2/3; D: TFA/DCM/TIPS – 50/48/2. The filtrate was precipitated into cold ether and purified with HPLC.

### **Preparation of peptides 5 – 8**

Functionalized peptides were added to the resin with DIC/DMAP as per standard Fmoc SPPS protocols. Fmoc-Ala-Wang resin (0.25 equiv) was swelled in DCM. The Fmoc group was removed with 20% pyridine in DMF and washed. Fmoc-peptide-OH (1 equiv) was dissolved in DCM and DMF and was added to the reaction vessel with DIC (0.75 equiv) and DMAP (0.05 equiv). After 2 hours the sample was washed with DCM and DMF. The Fmoc group was removed with pyridine in DMF and washed. Fmoc-depsidipeptide (1 equiv) was dissolved in DCM with Oxymapure (0.2 equiv) and was added to the reaction vessel upon a 2 minute preactivation time with DIC (0.75 equiv). After 2 hours the sample was washed with DCM and DMF. The Fmoc-removal, coupling, and washing steps were repeated with the Fmoc-depsidipeptide until the desired length was achieved. The oligodepsipeptide was removed from the resin accordingly and purified with HPLC.

1. Fan, W., et al., *Enhanced Brain Targeting of Tegafur Using Novel Lactyl Cholesterol Liposome as a Carrier*. *Letters in Drug Design & Discovery*, 2009. **6**(7): p. 542-547.

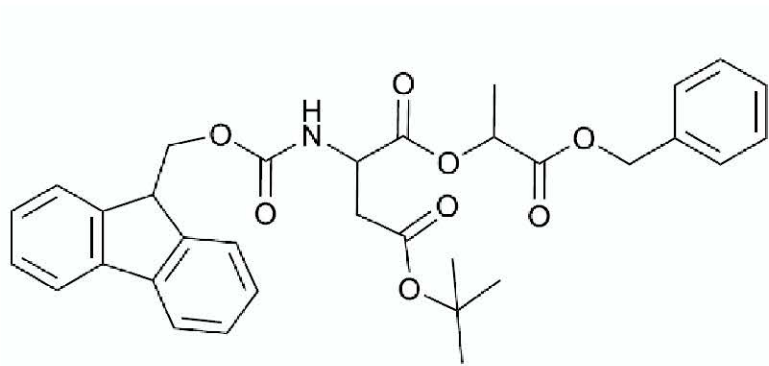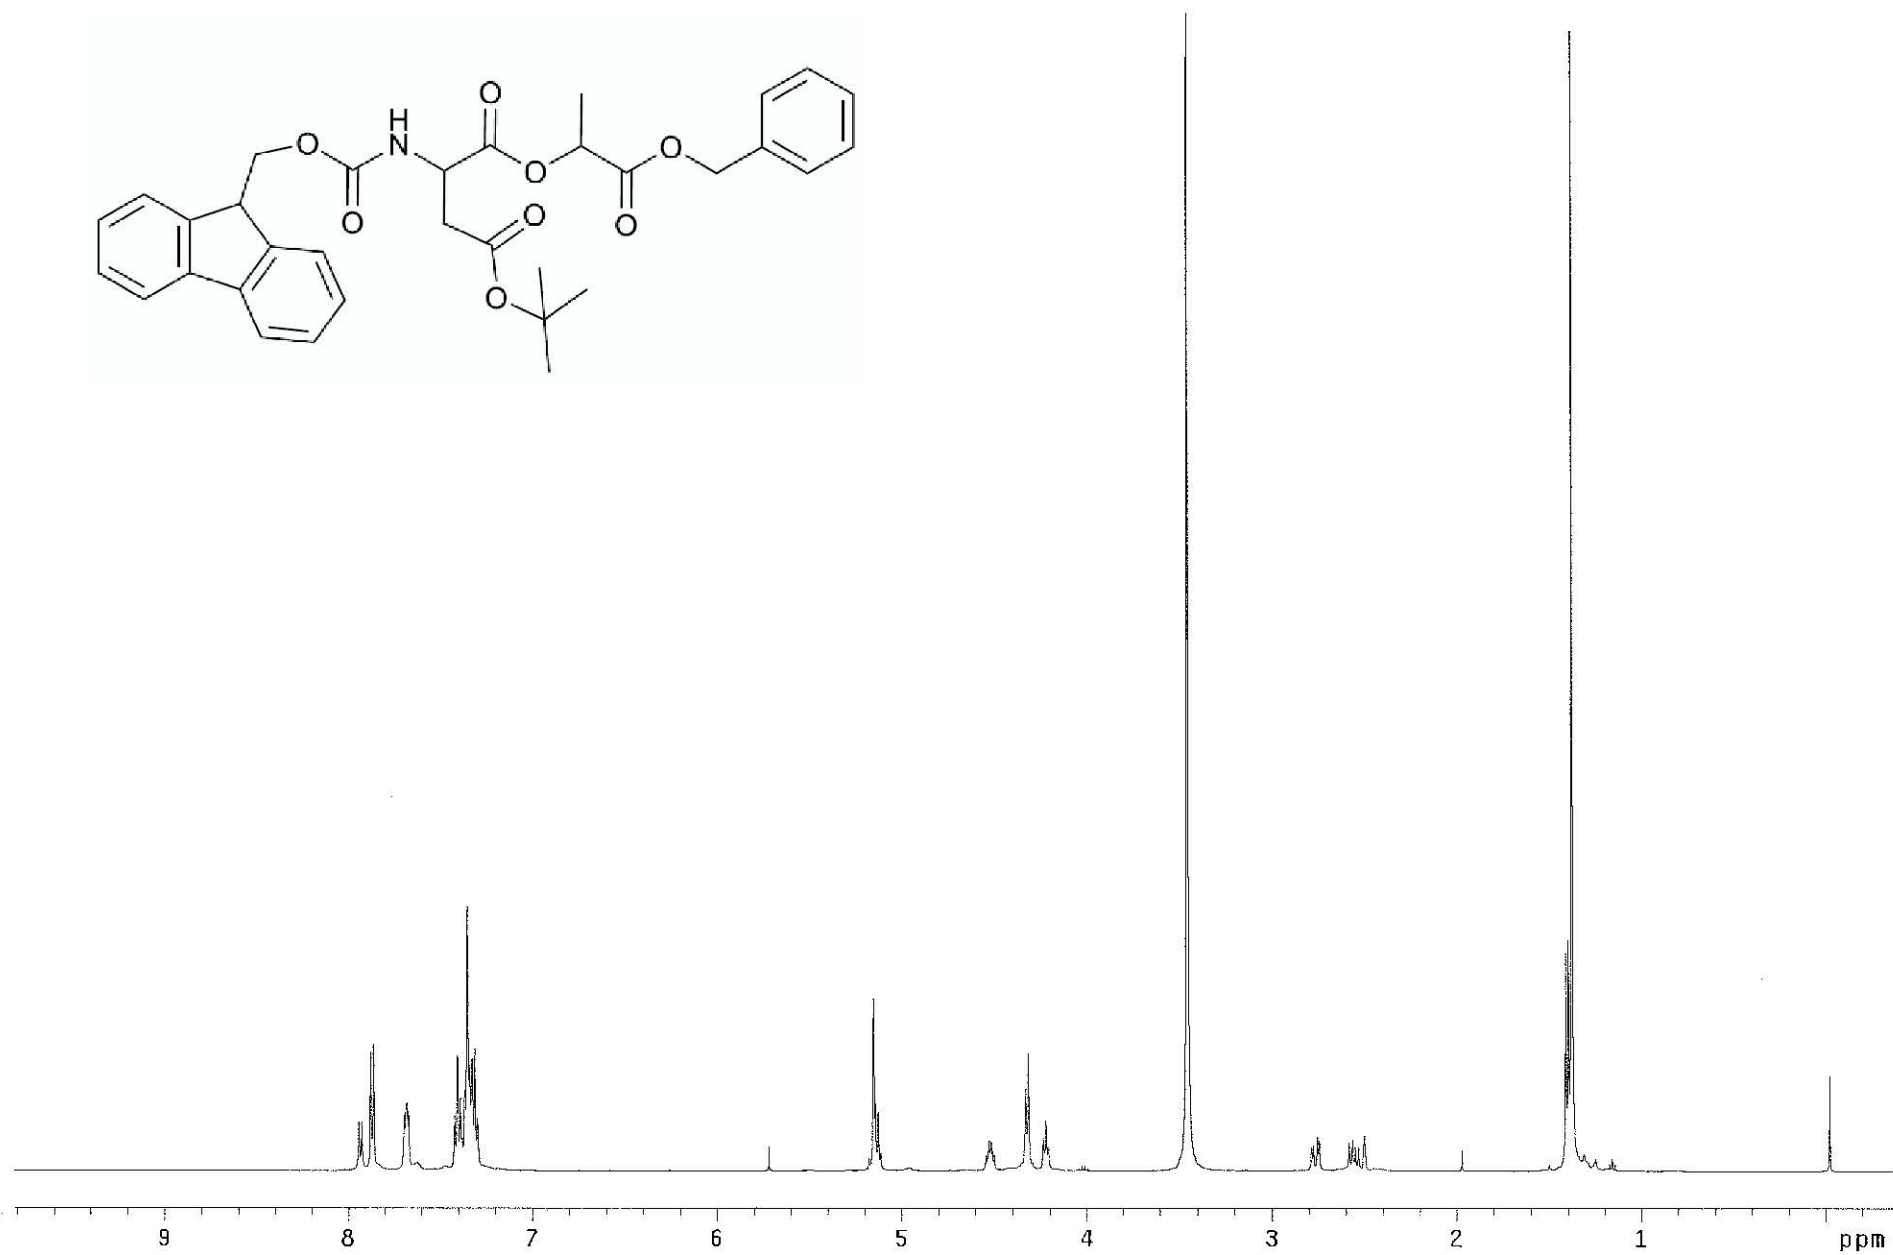

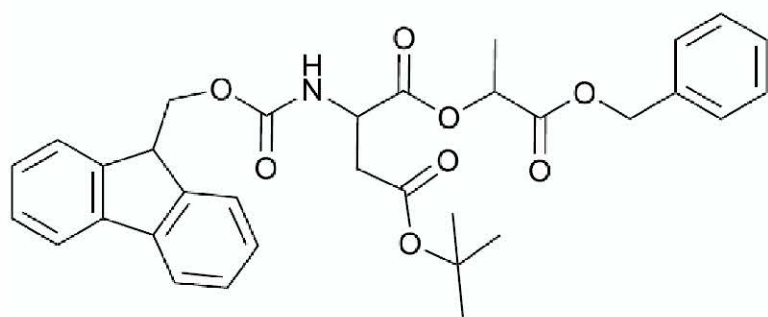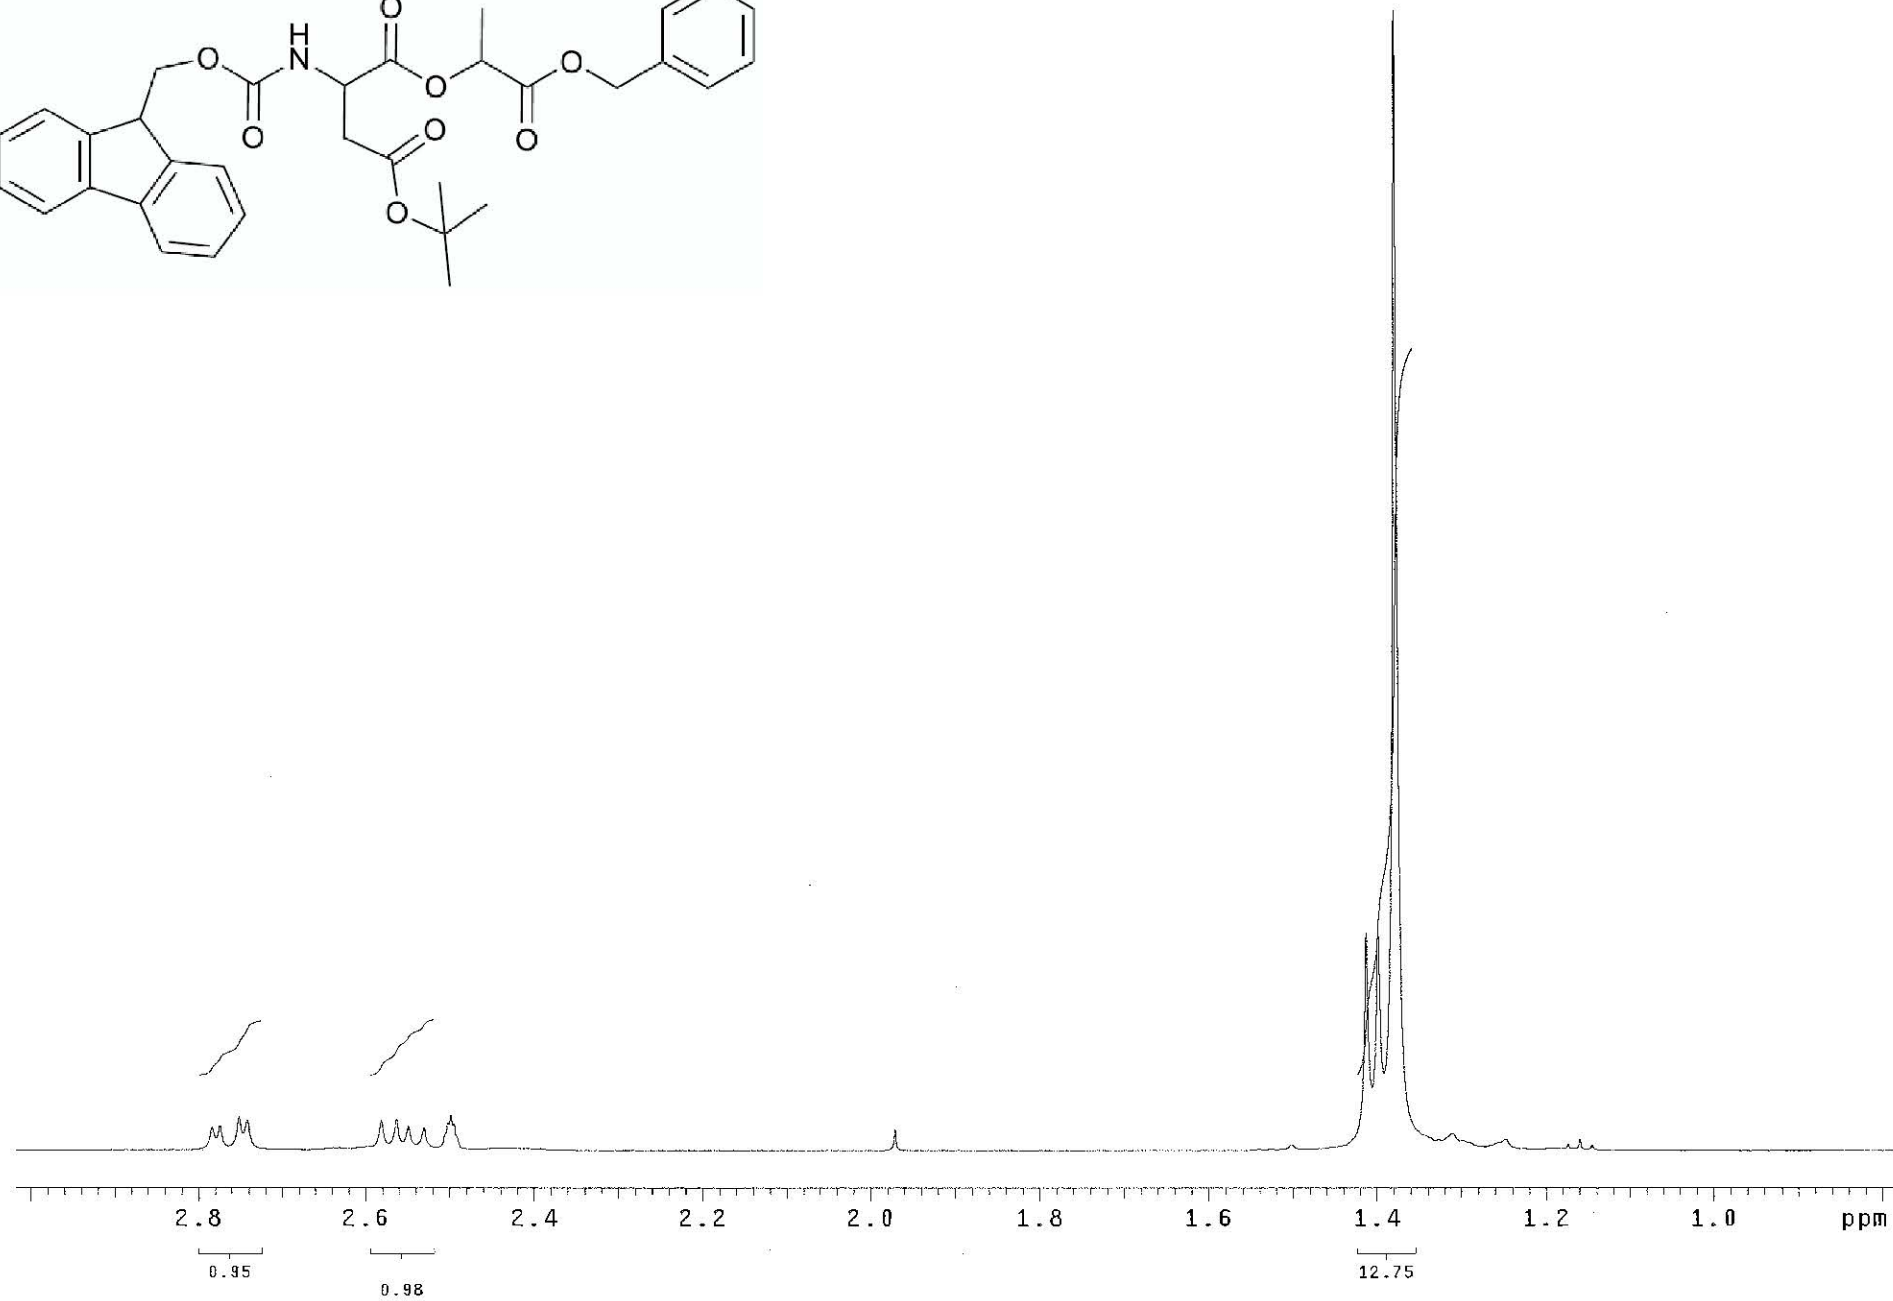

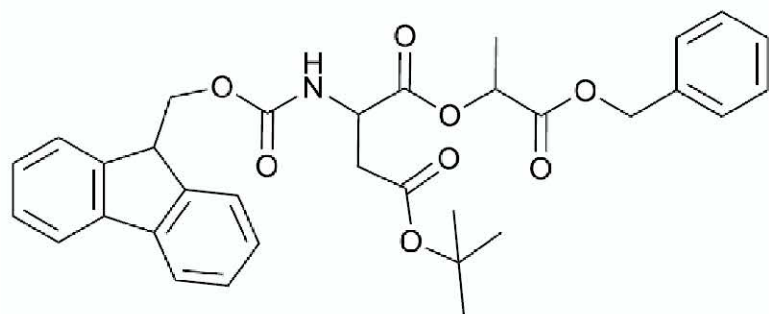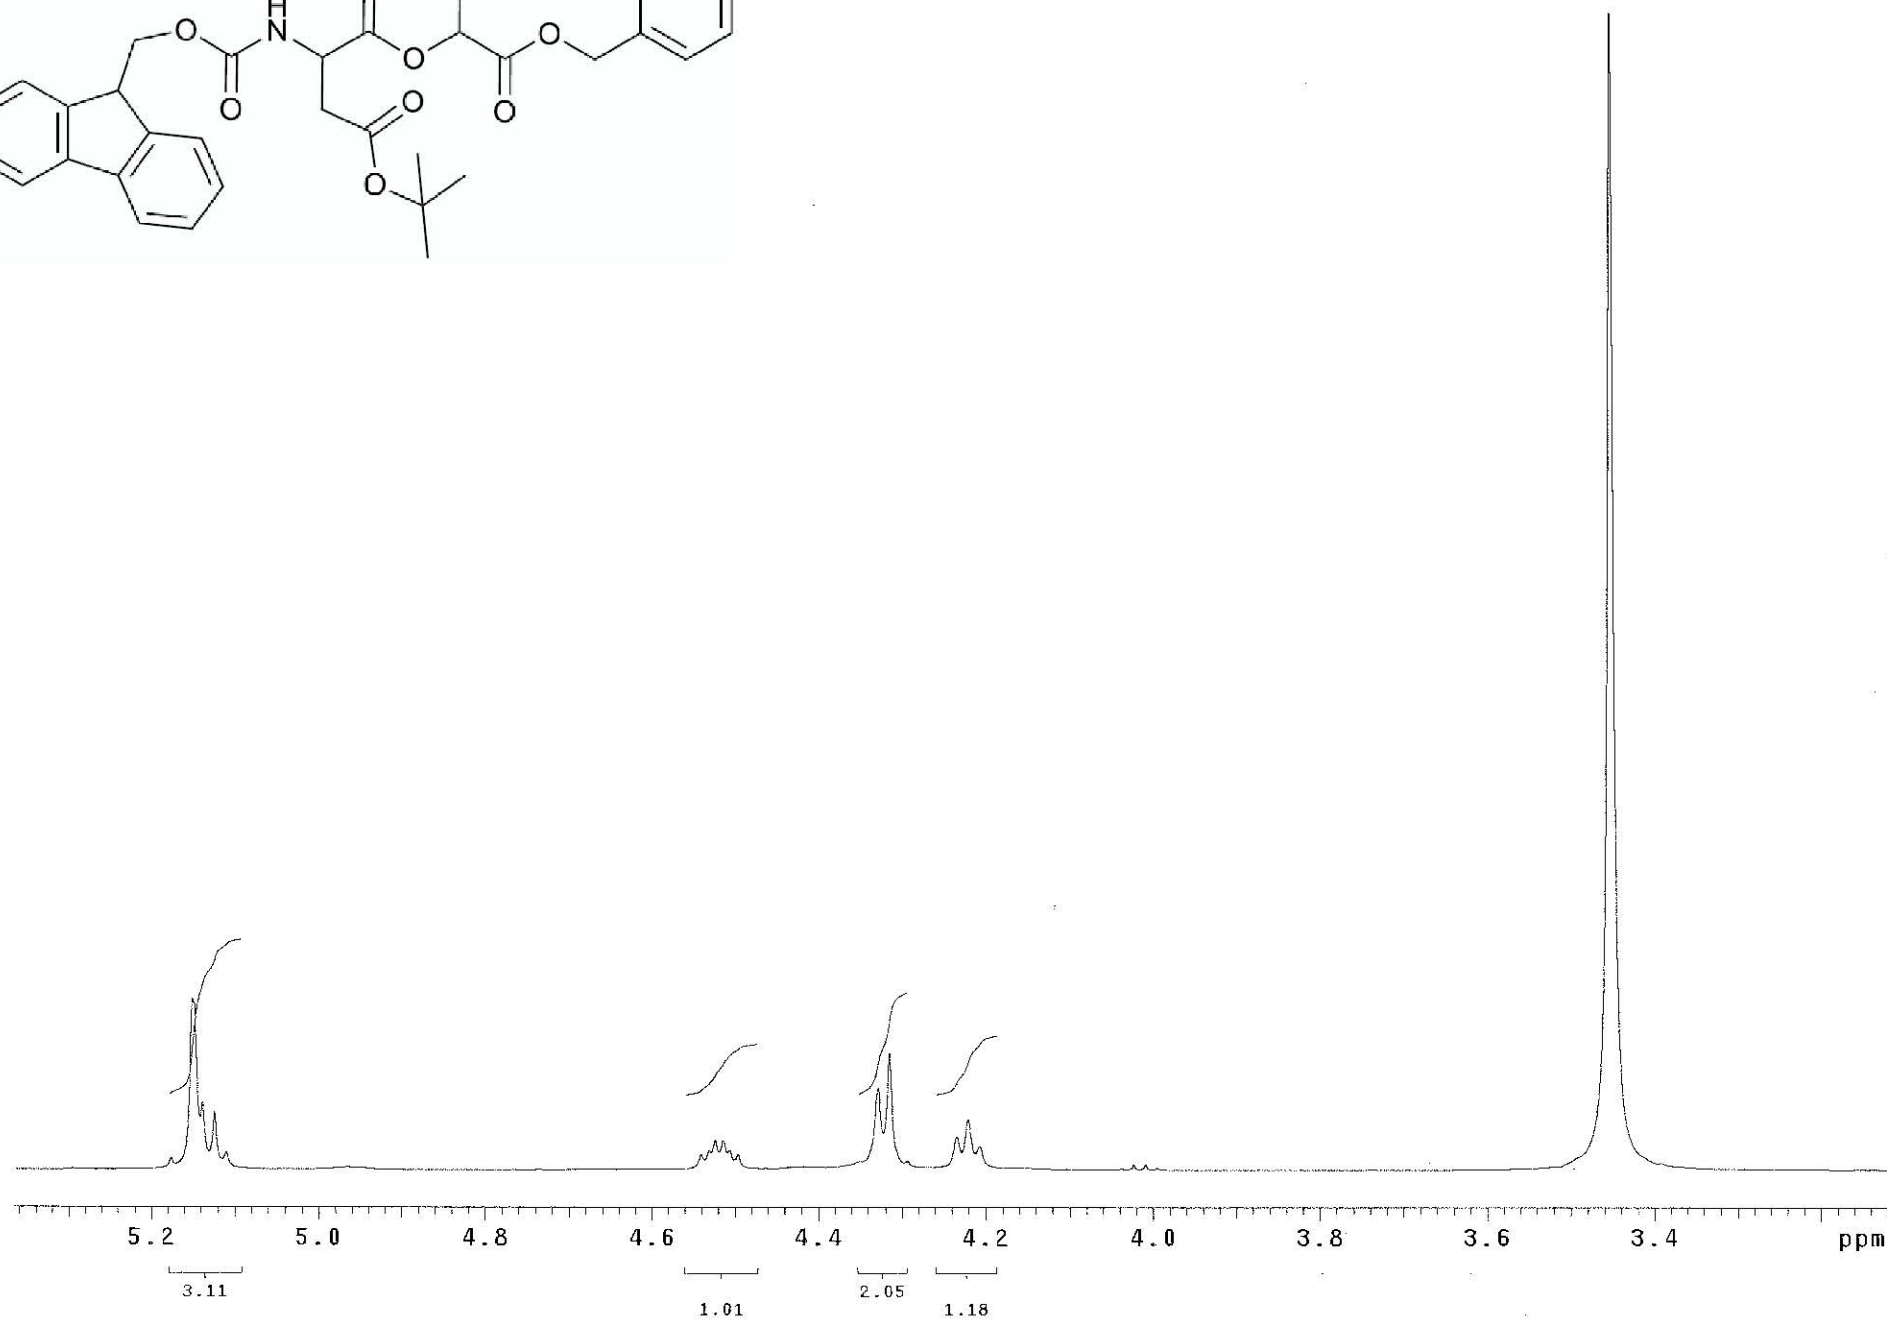



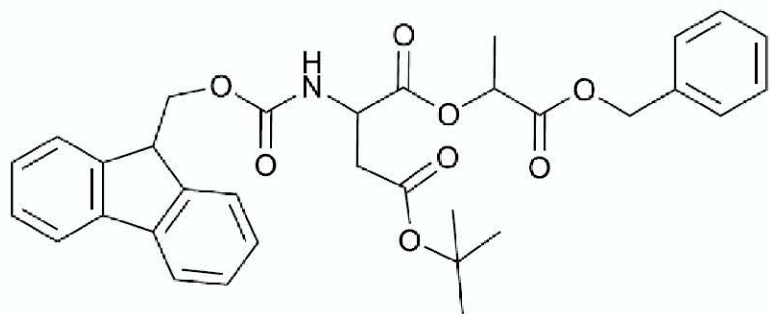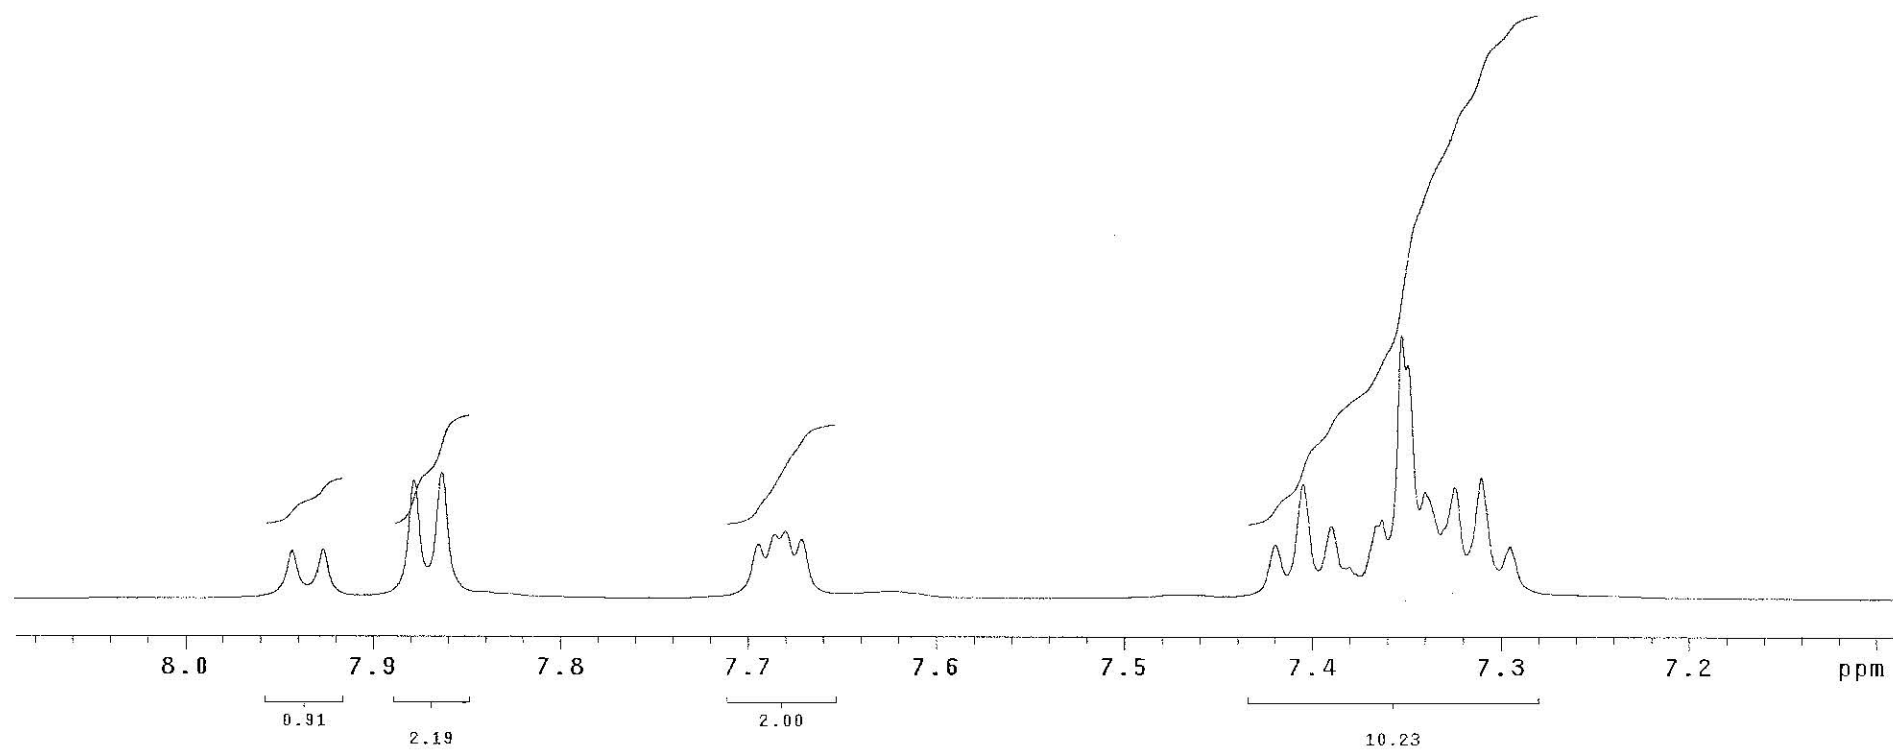

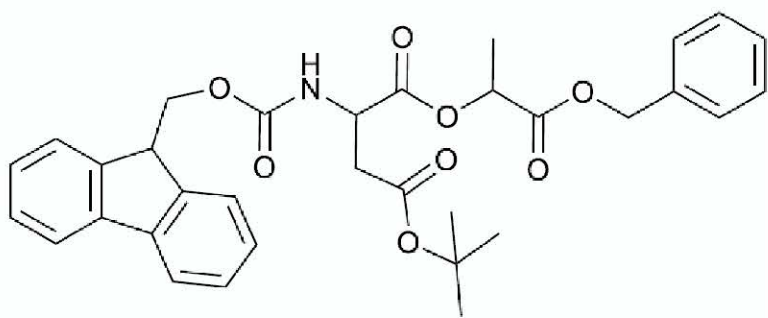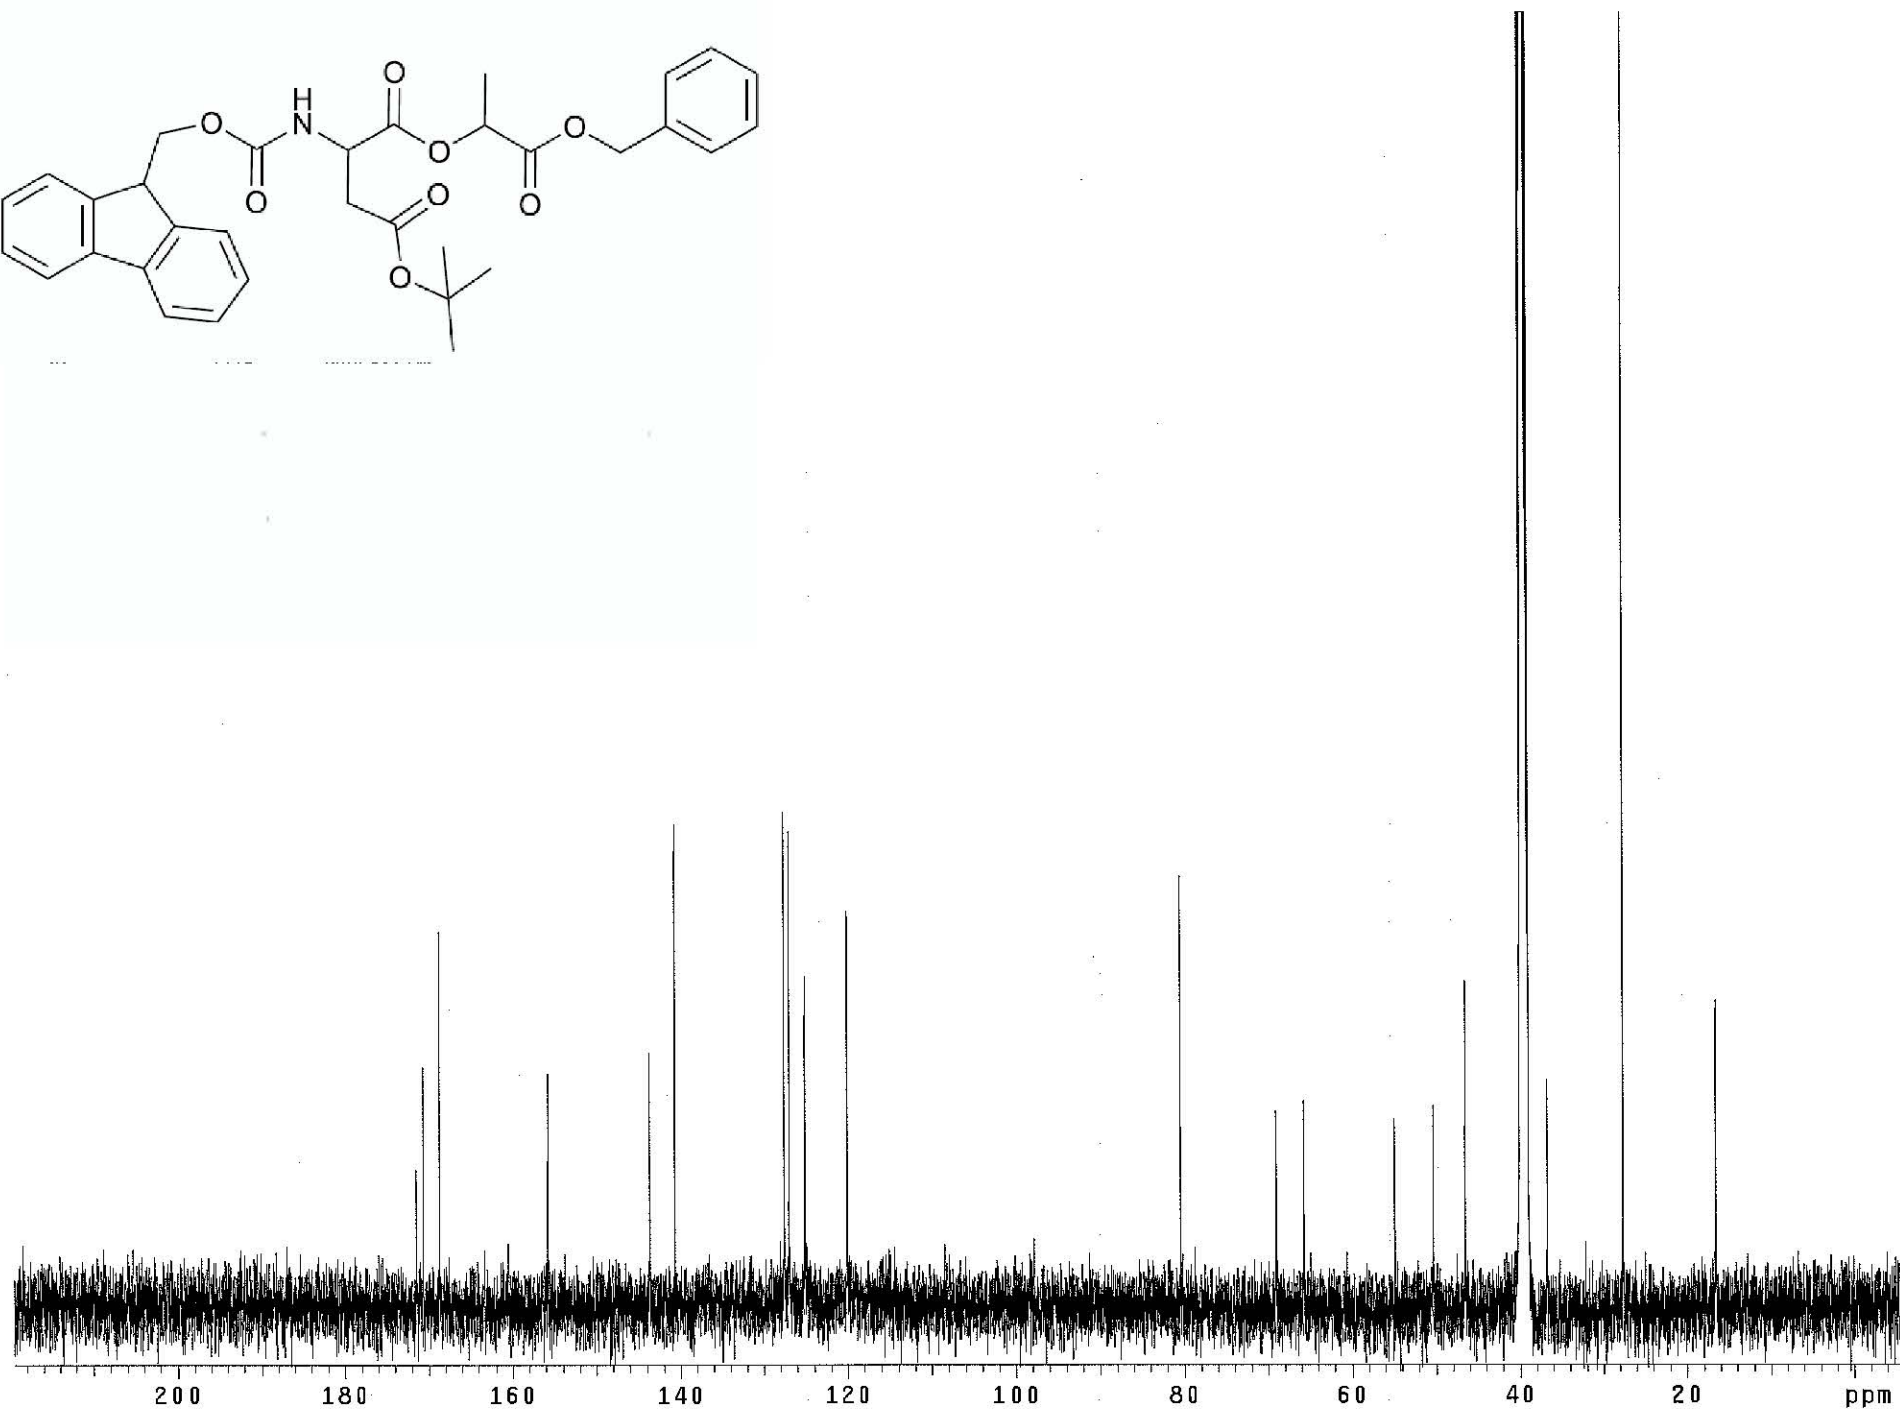

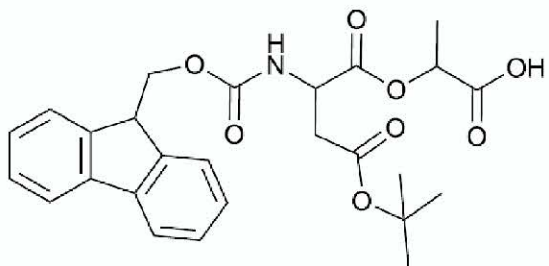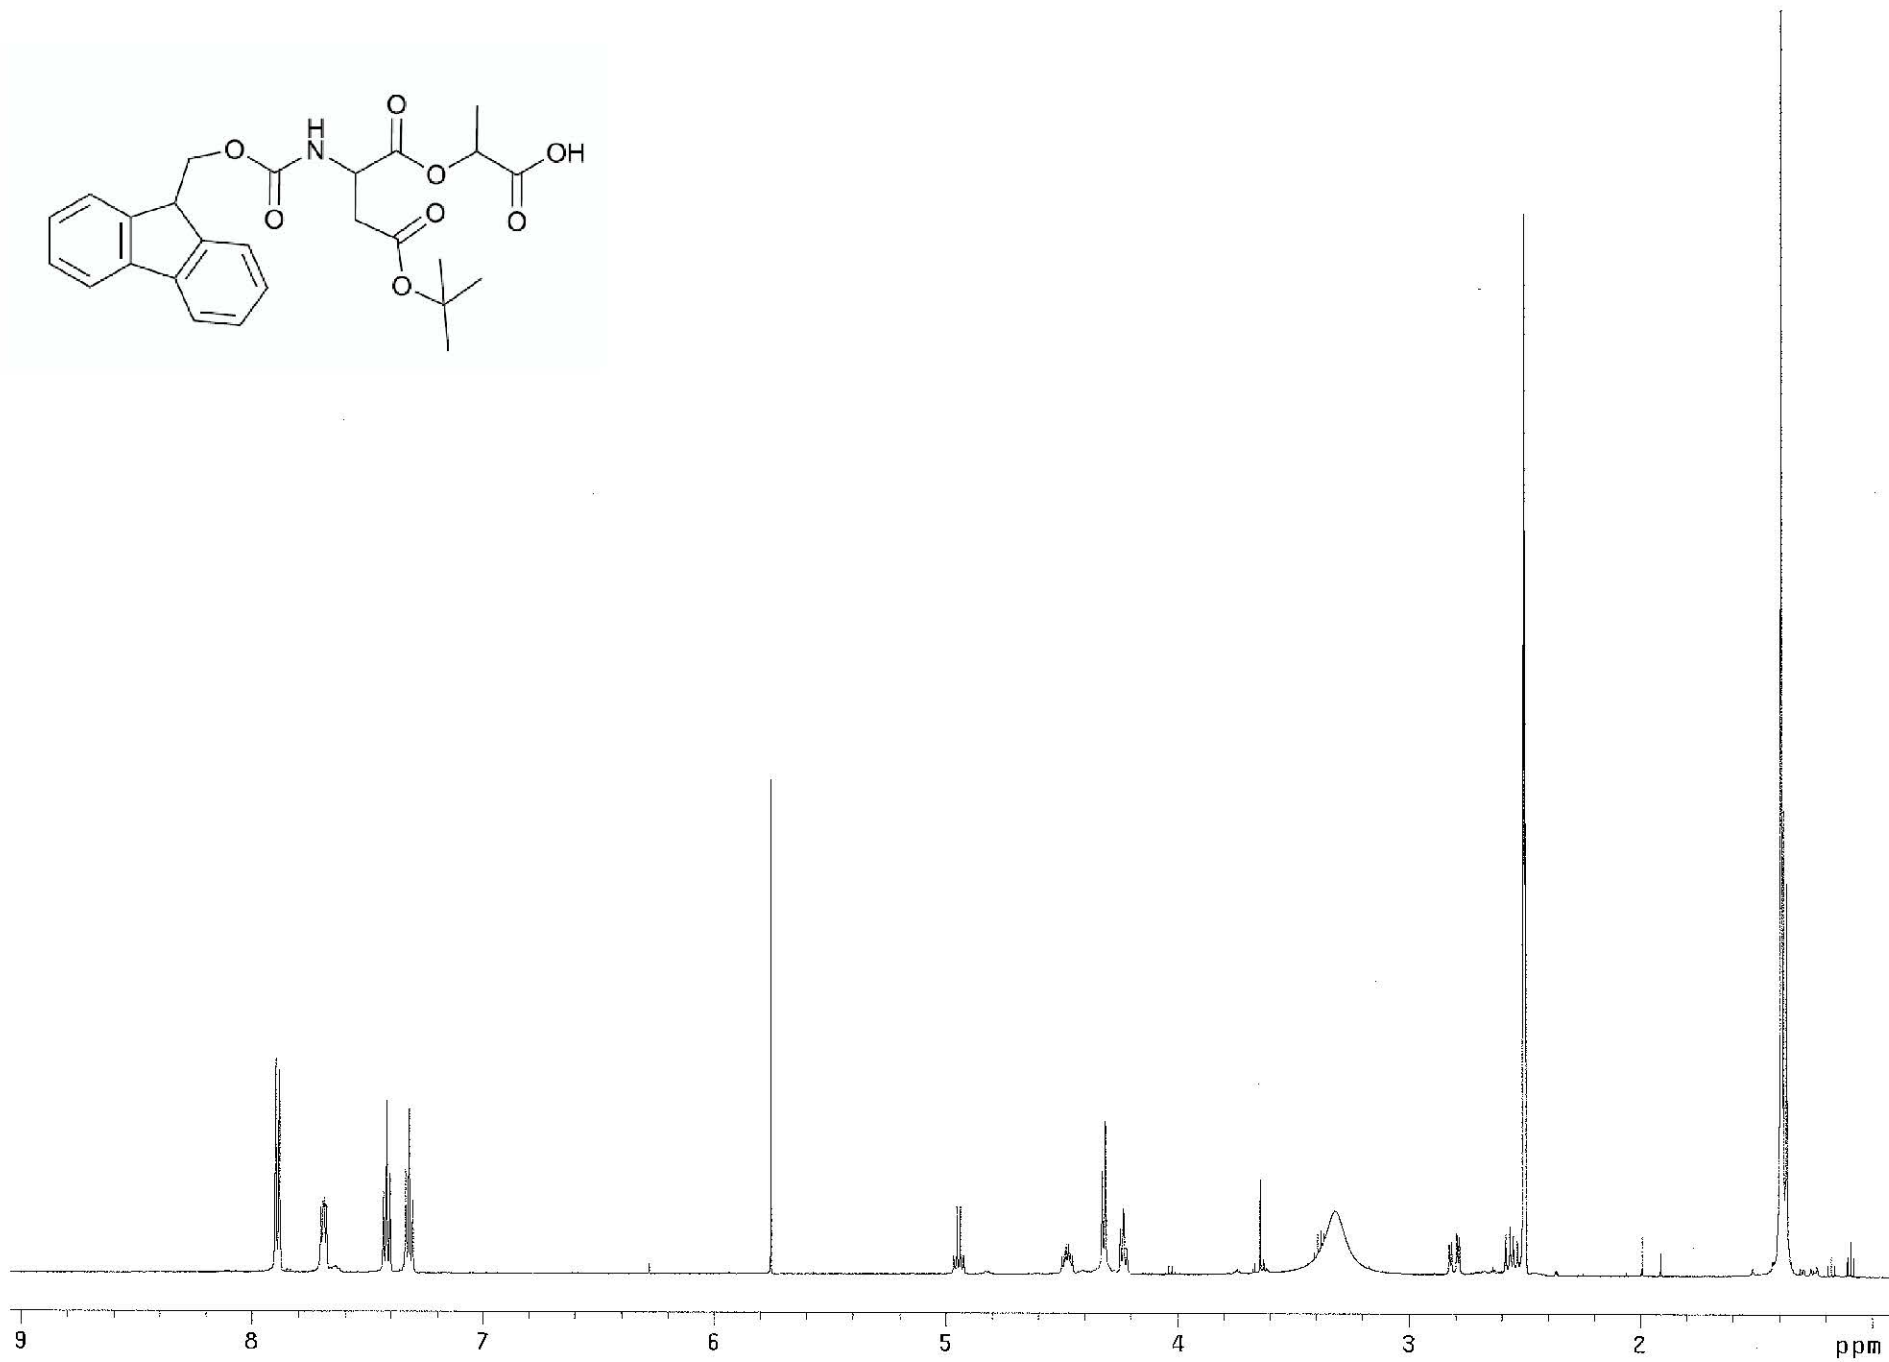

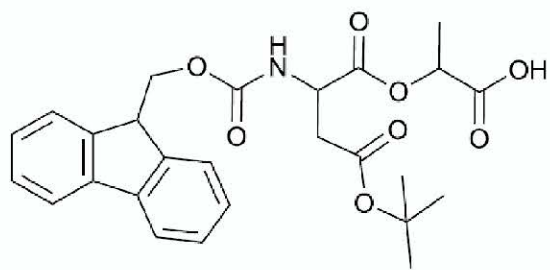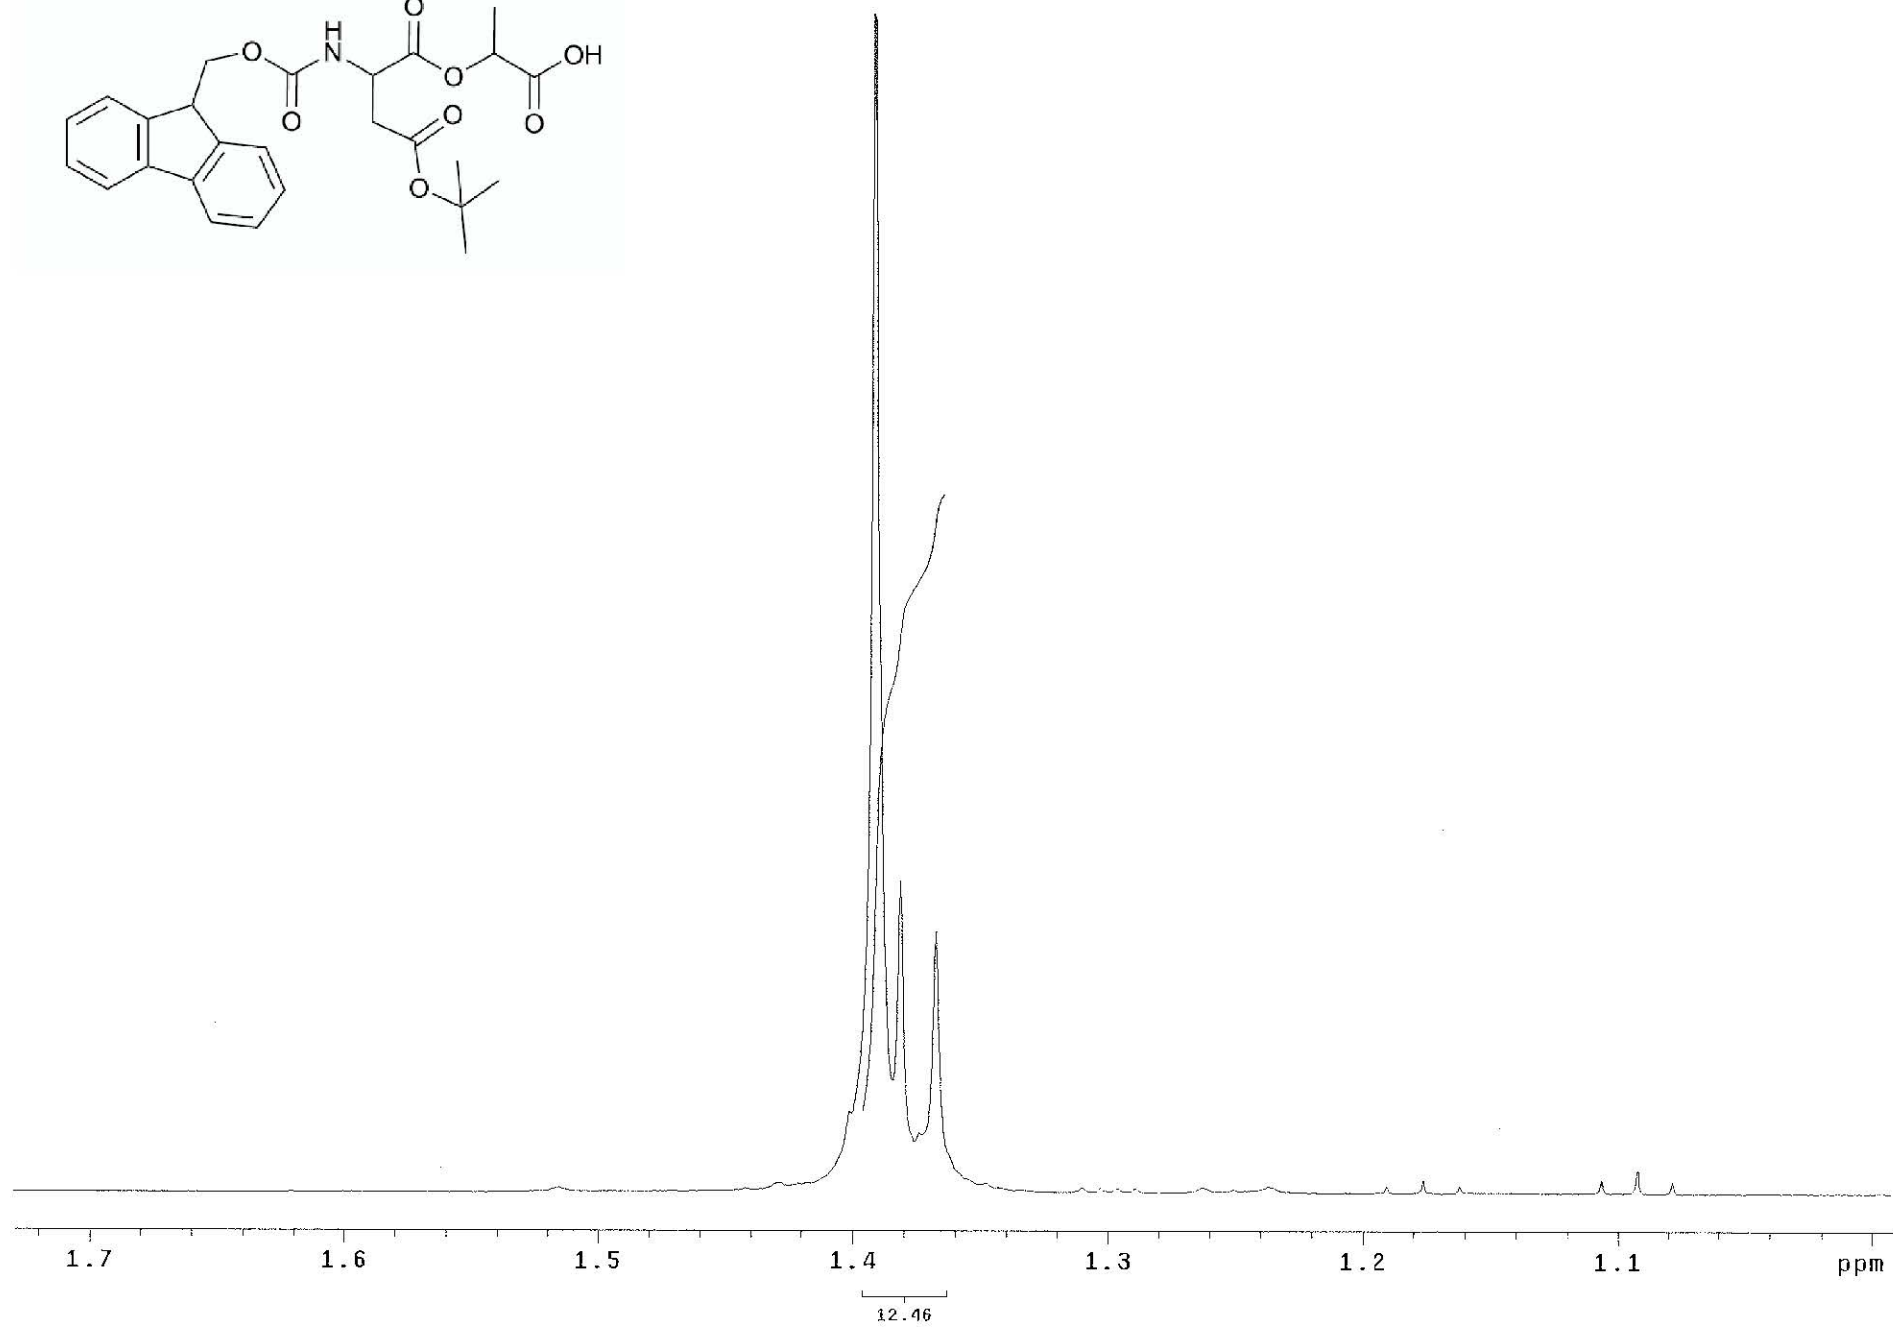

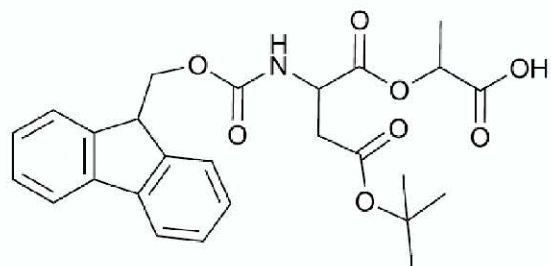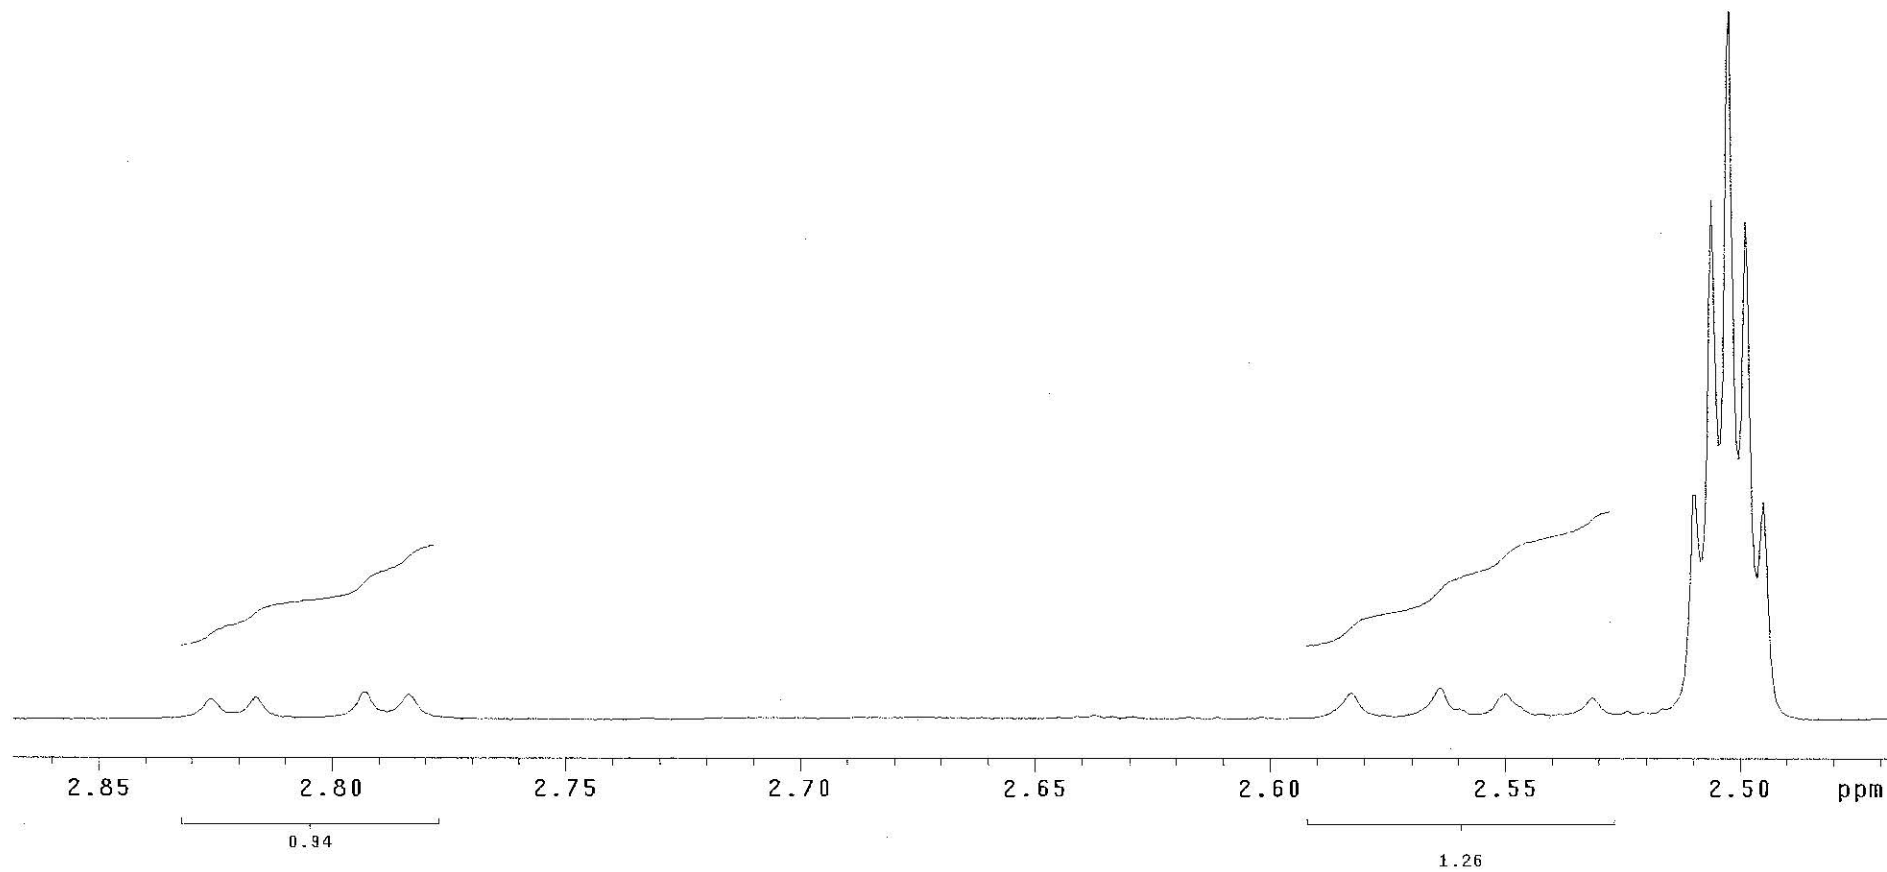

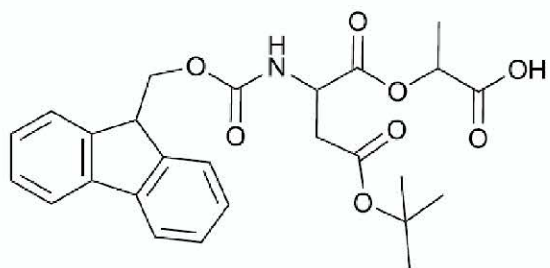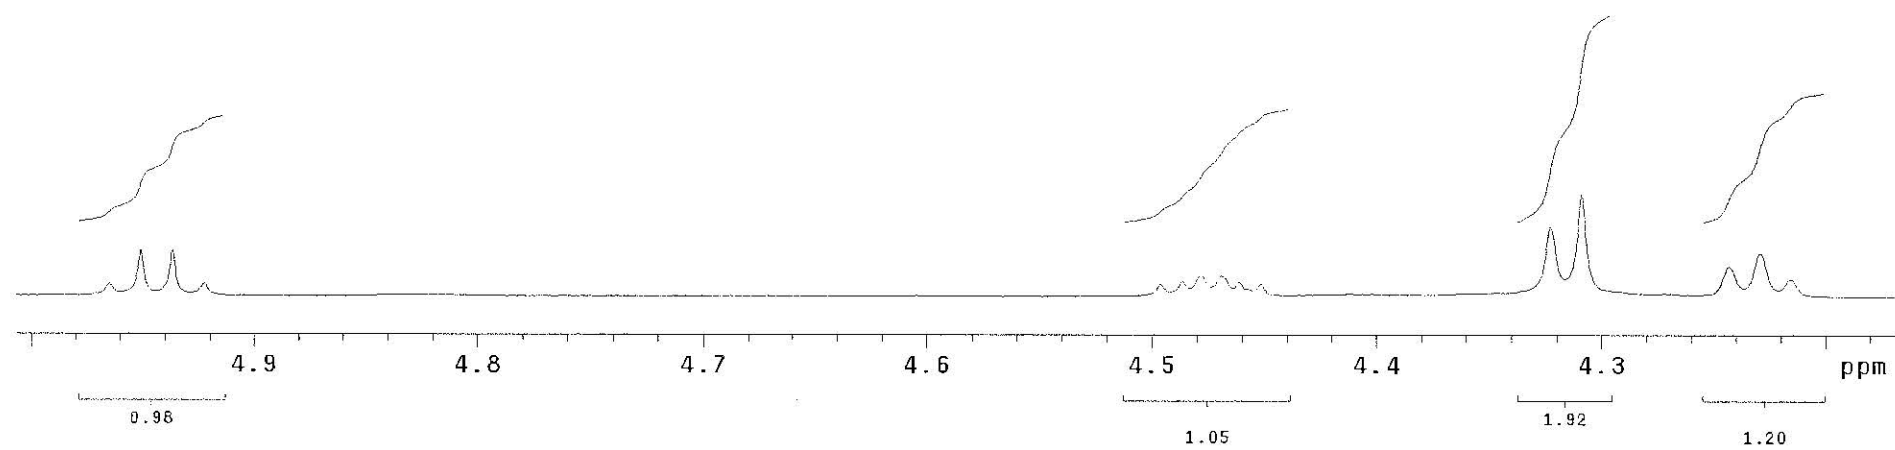

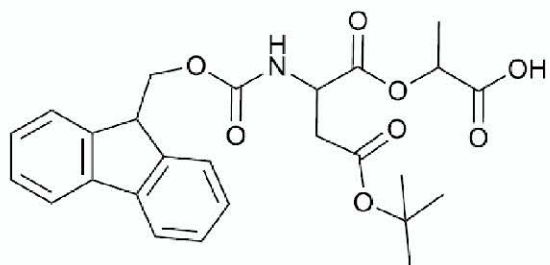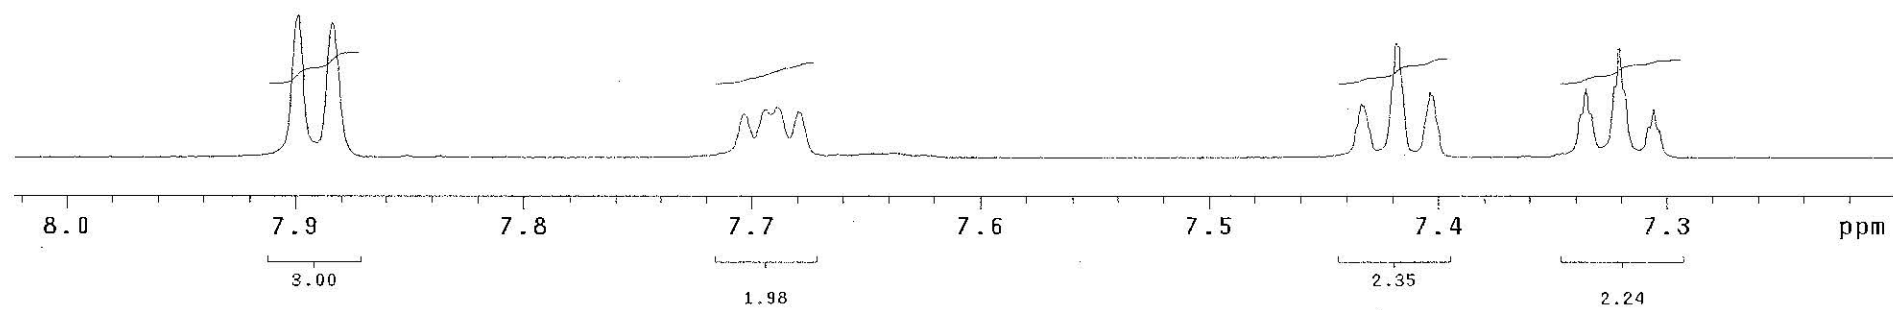

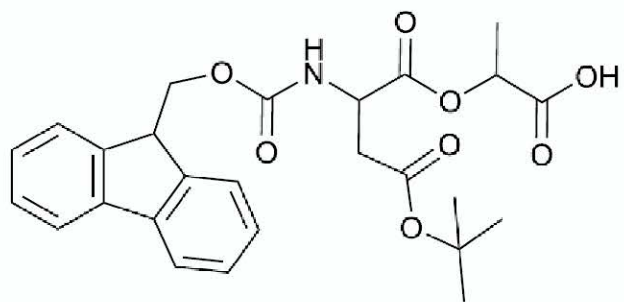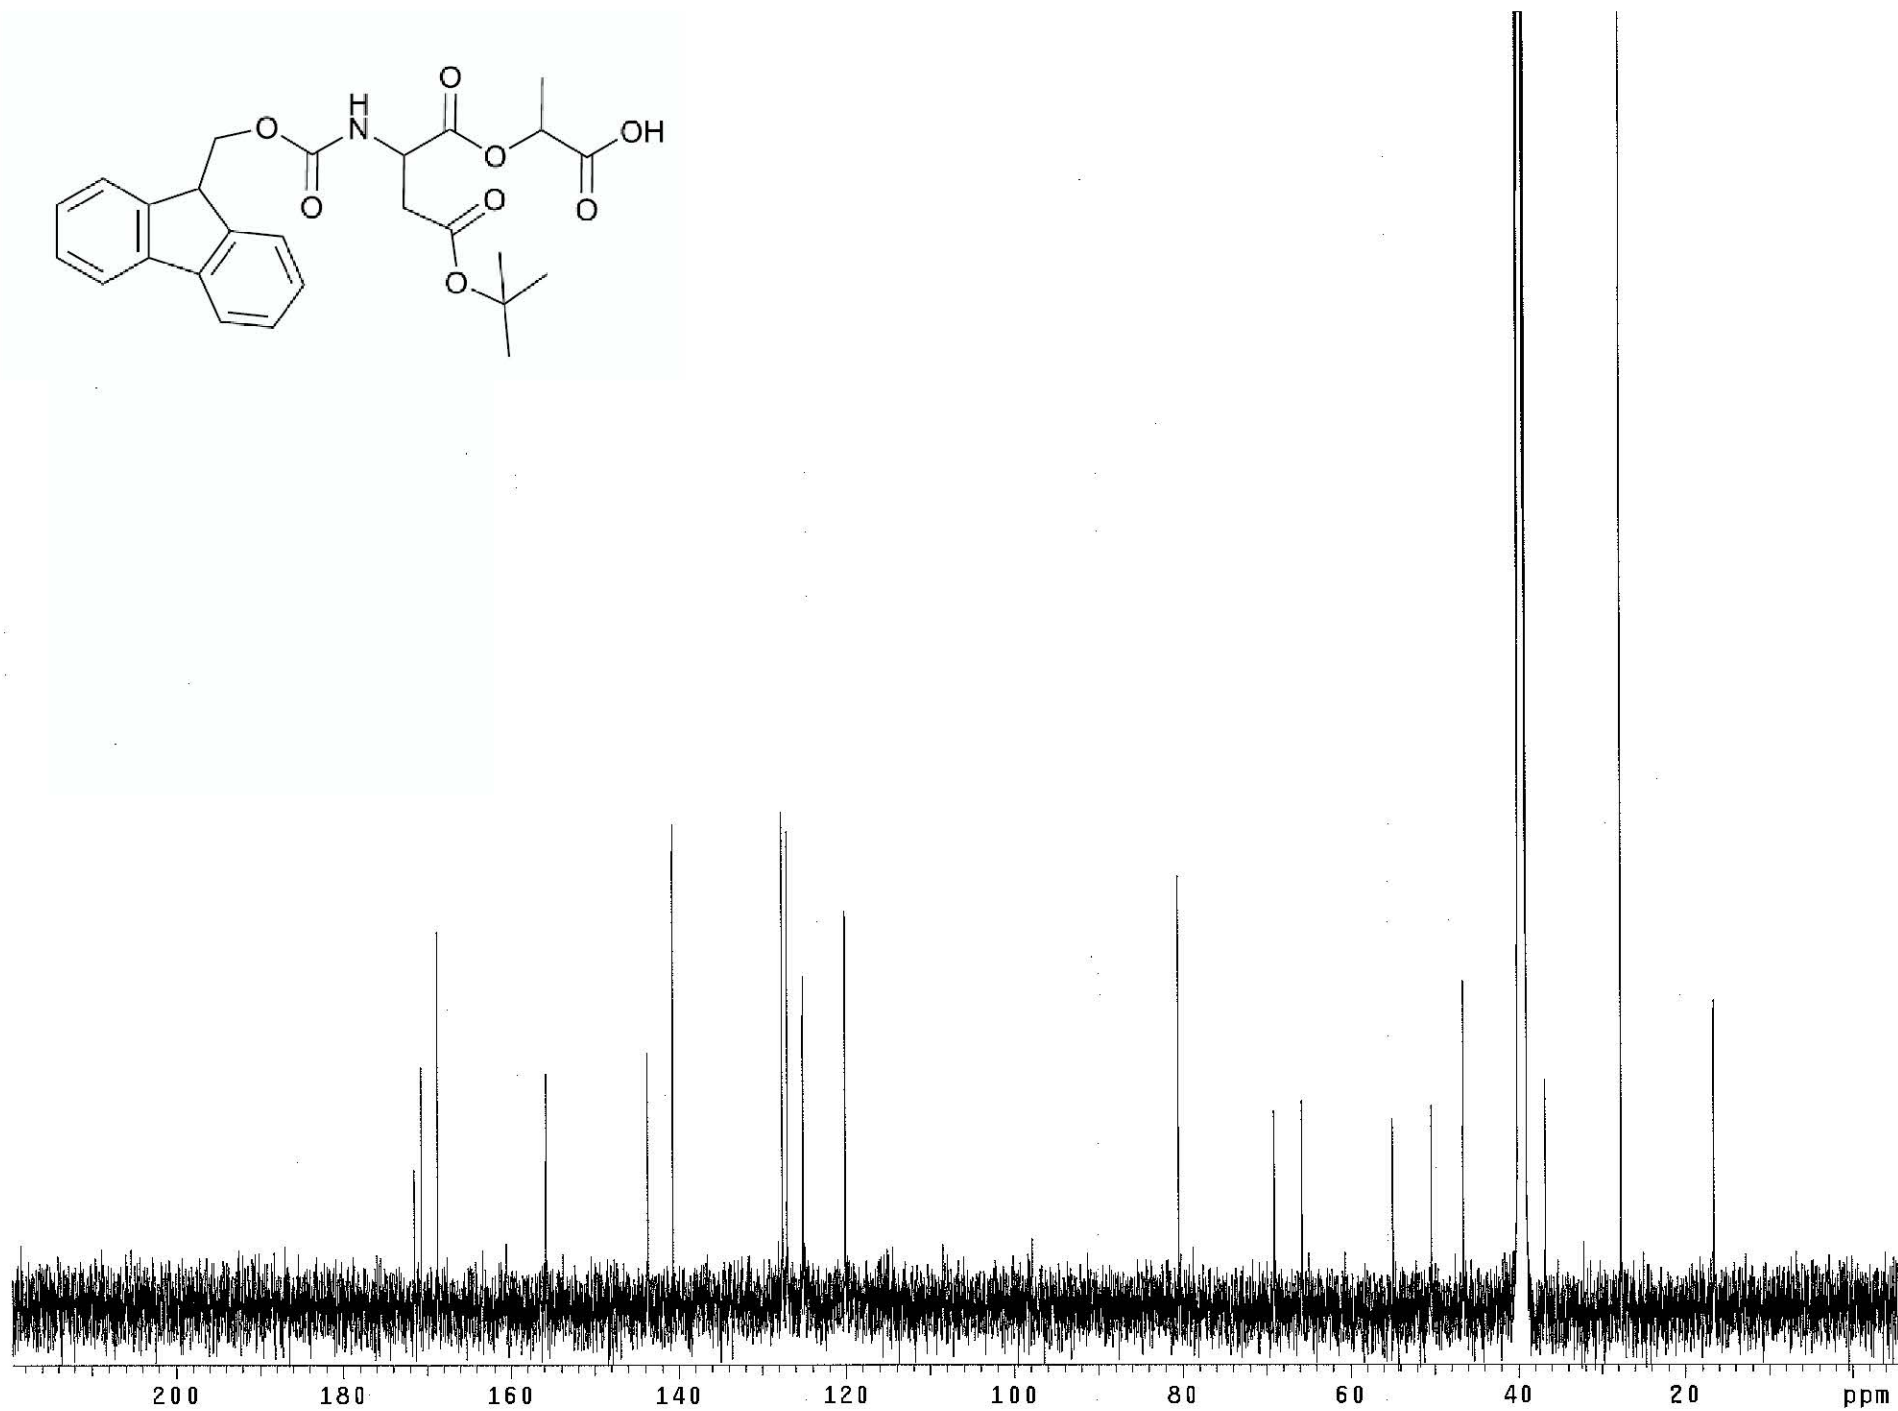



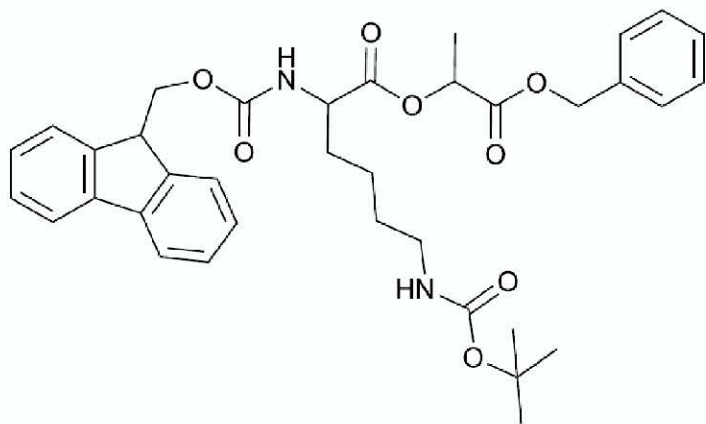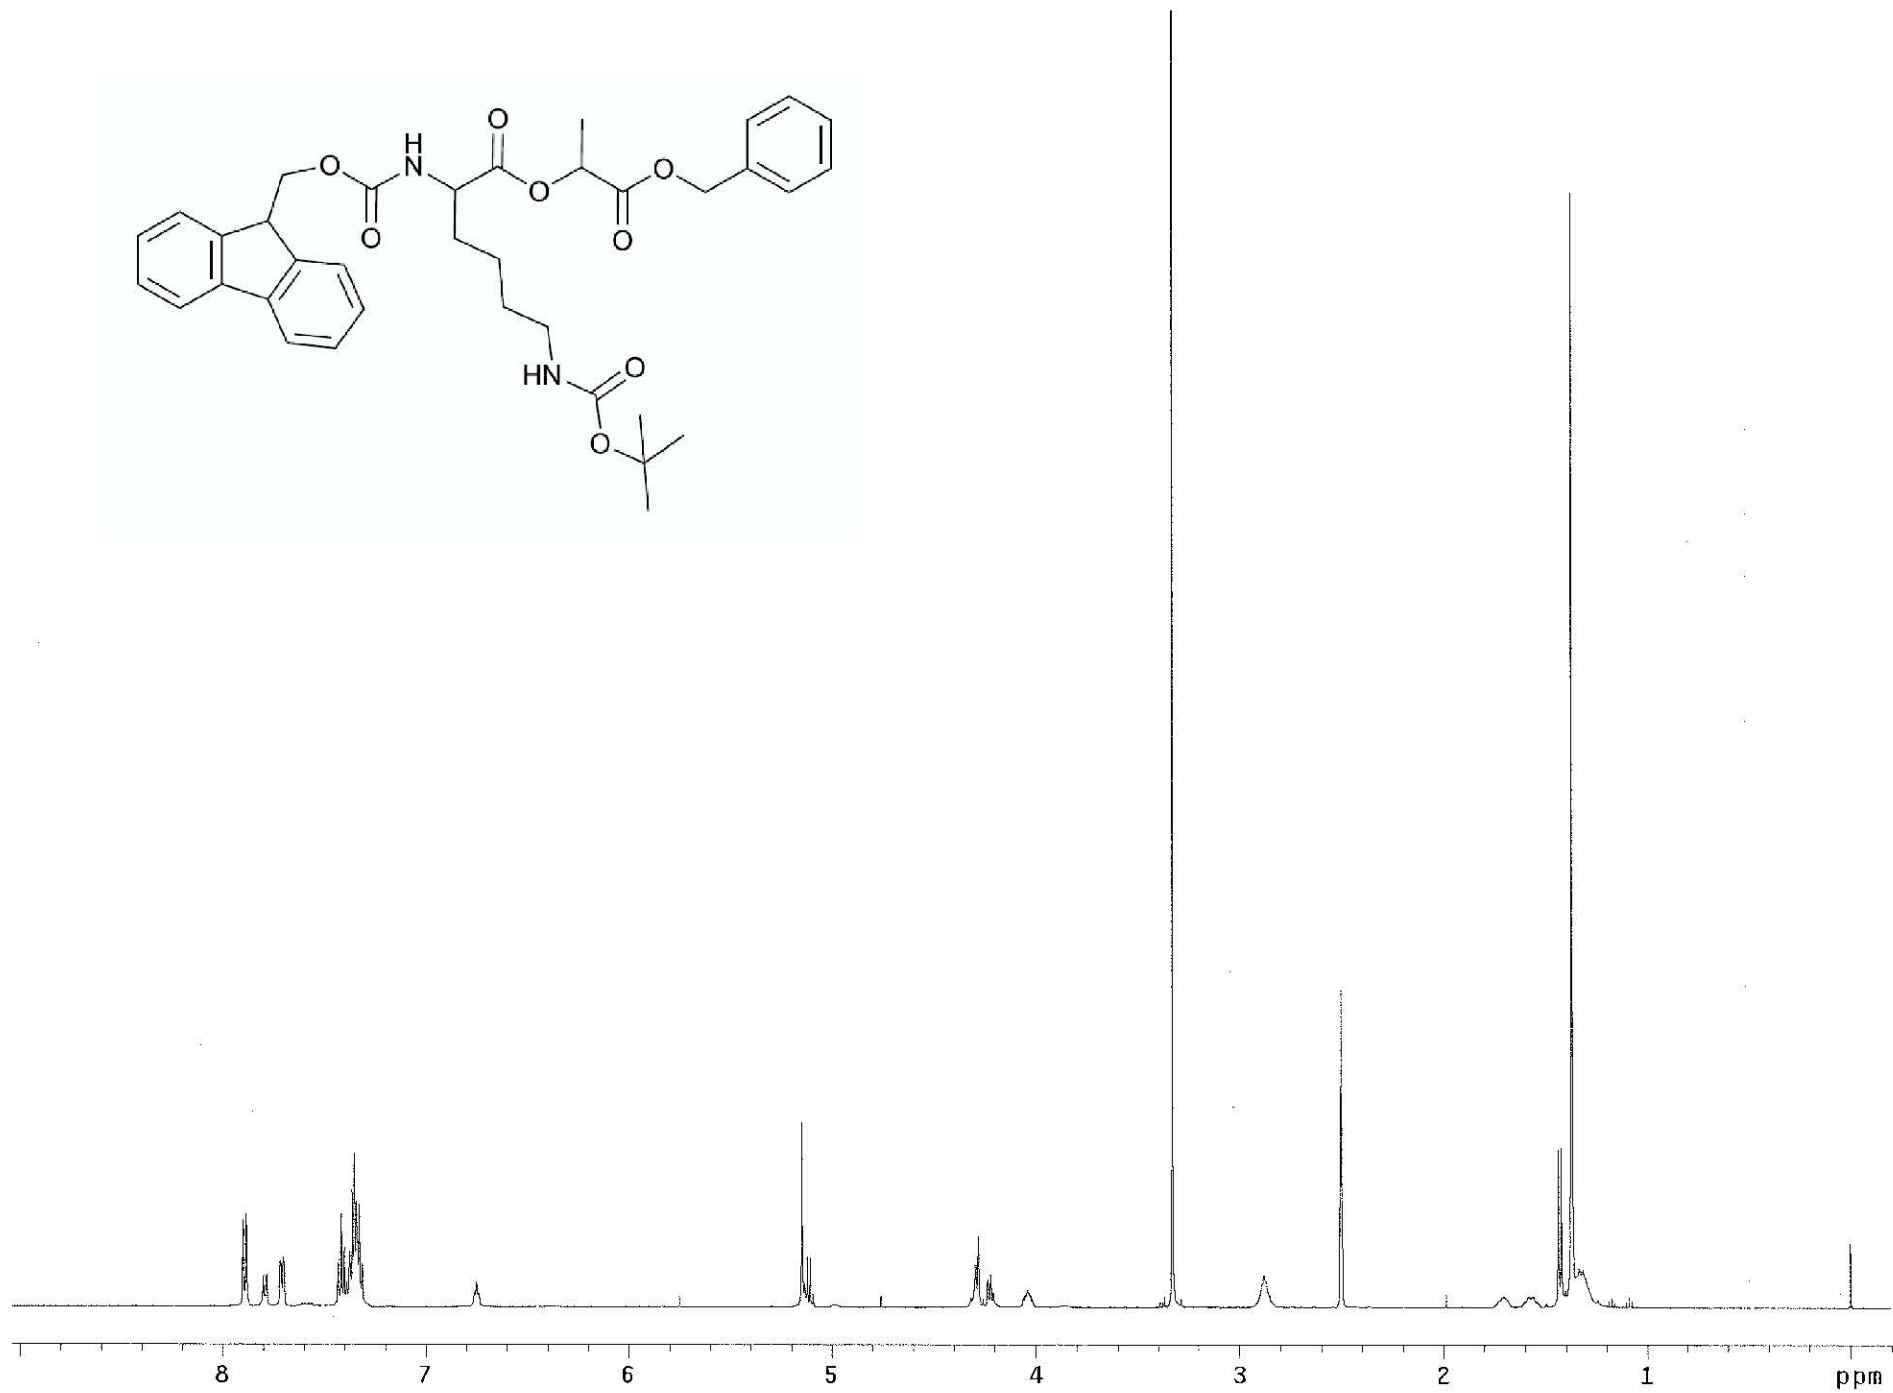

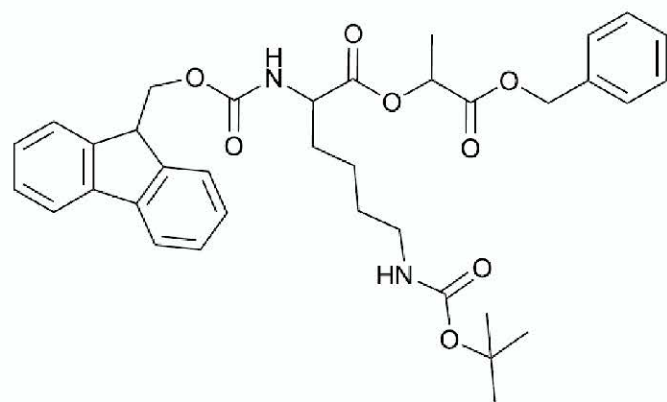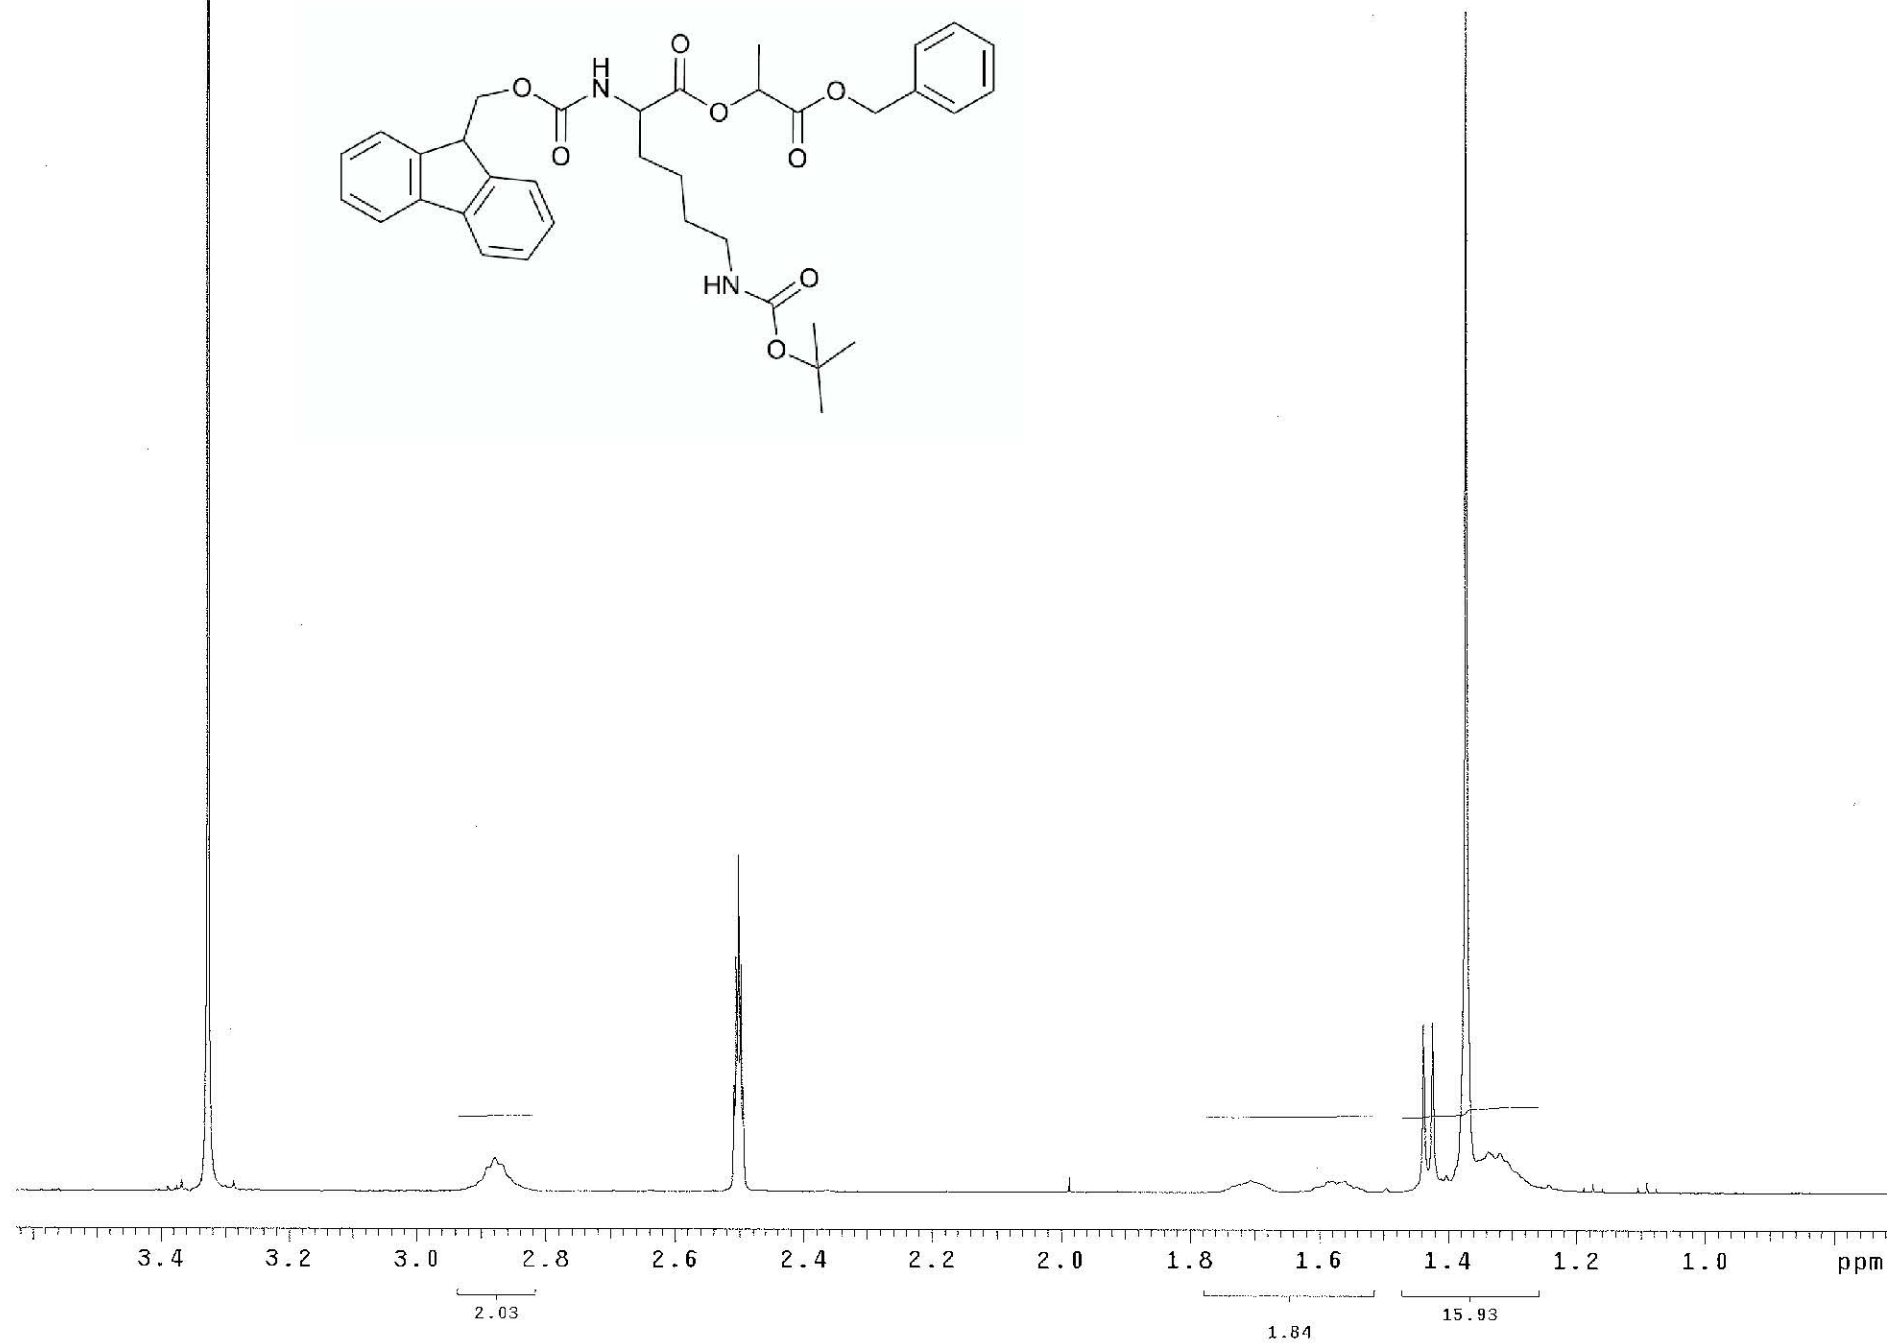

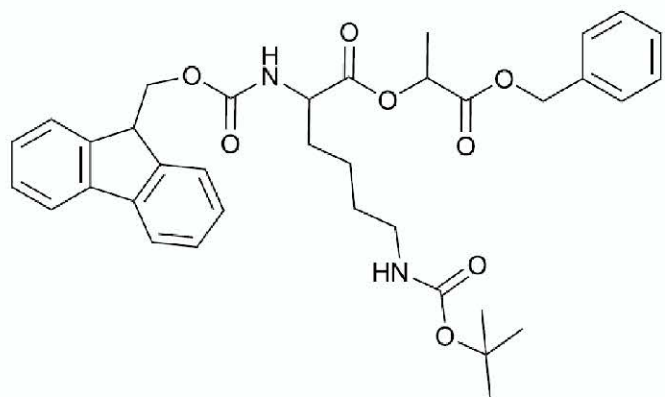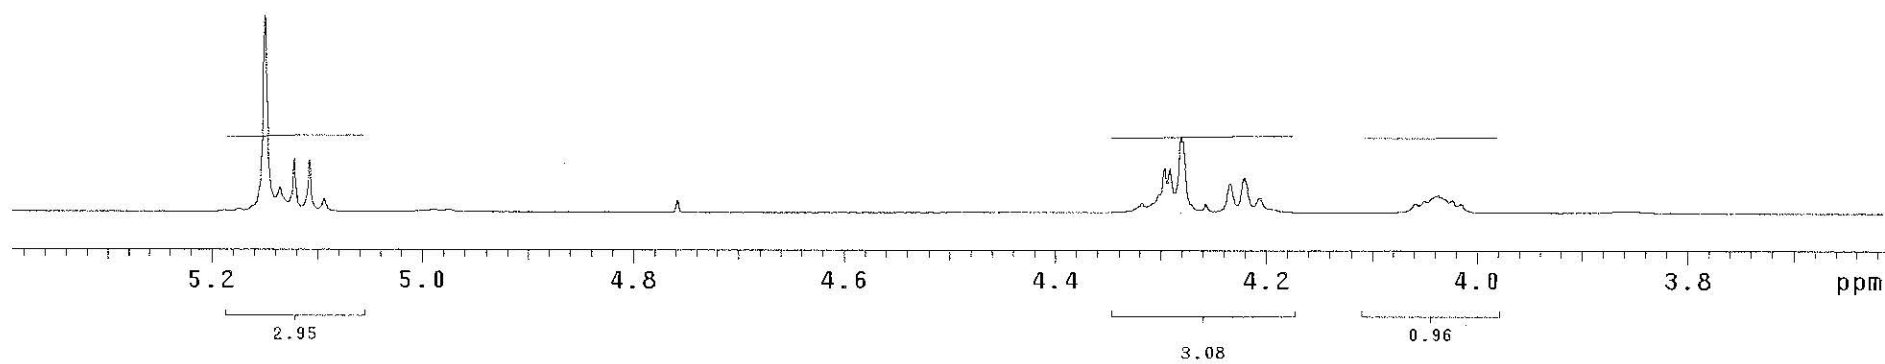

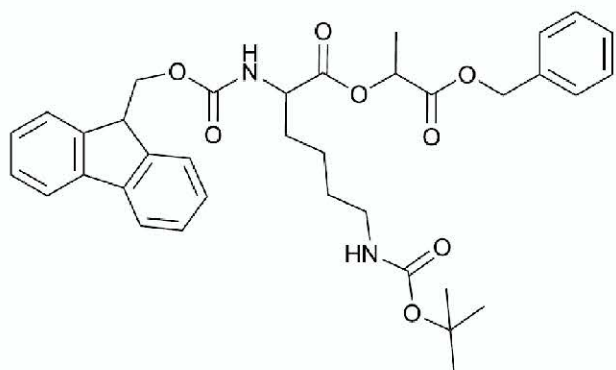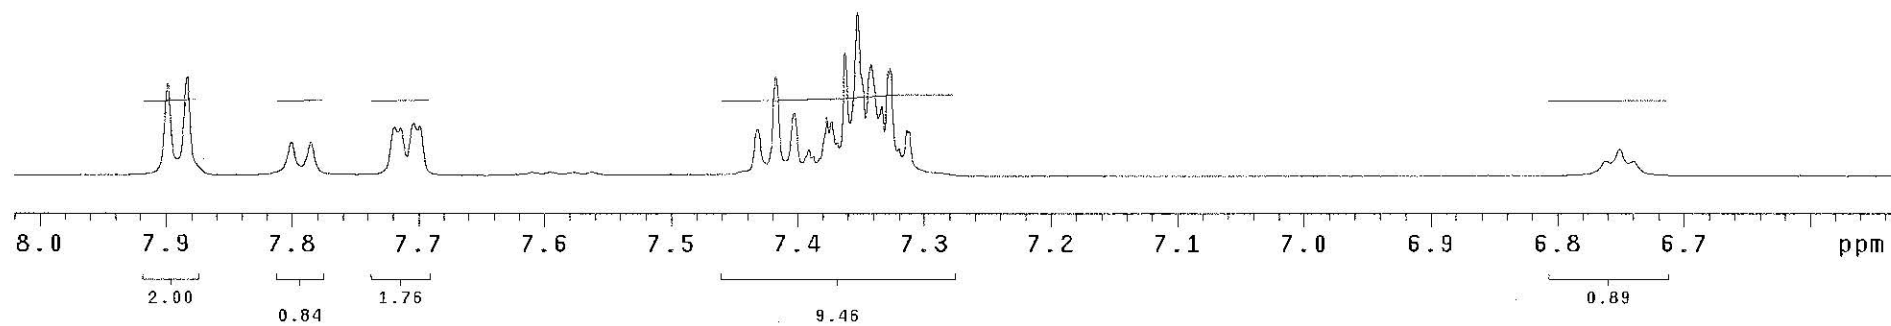

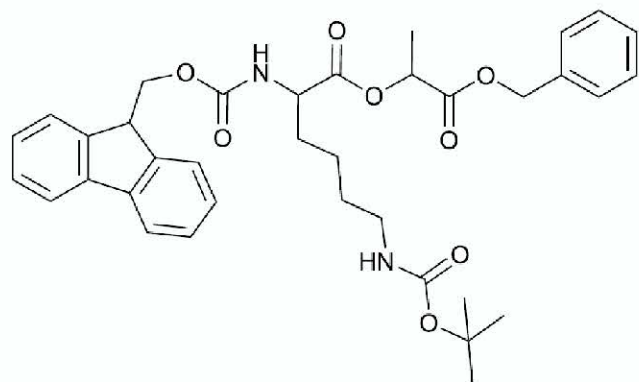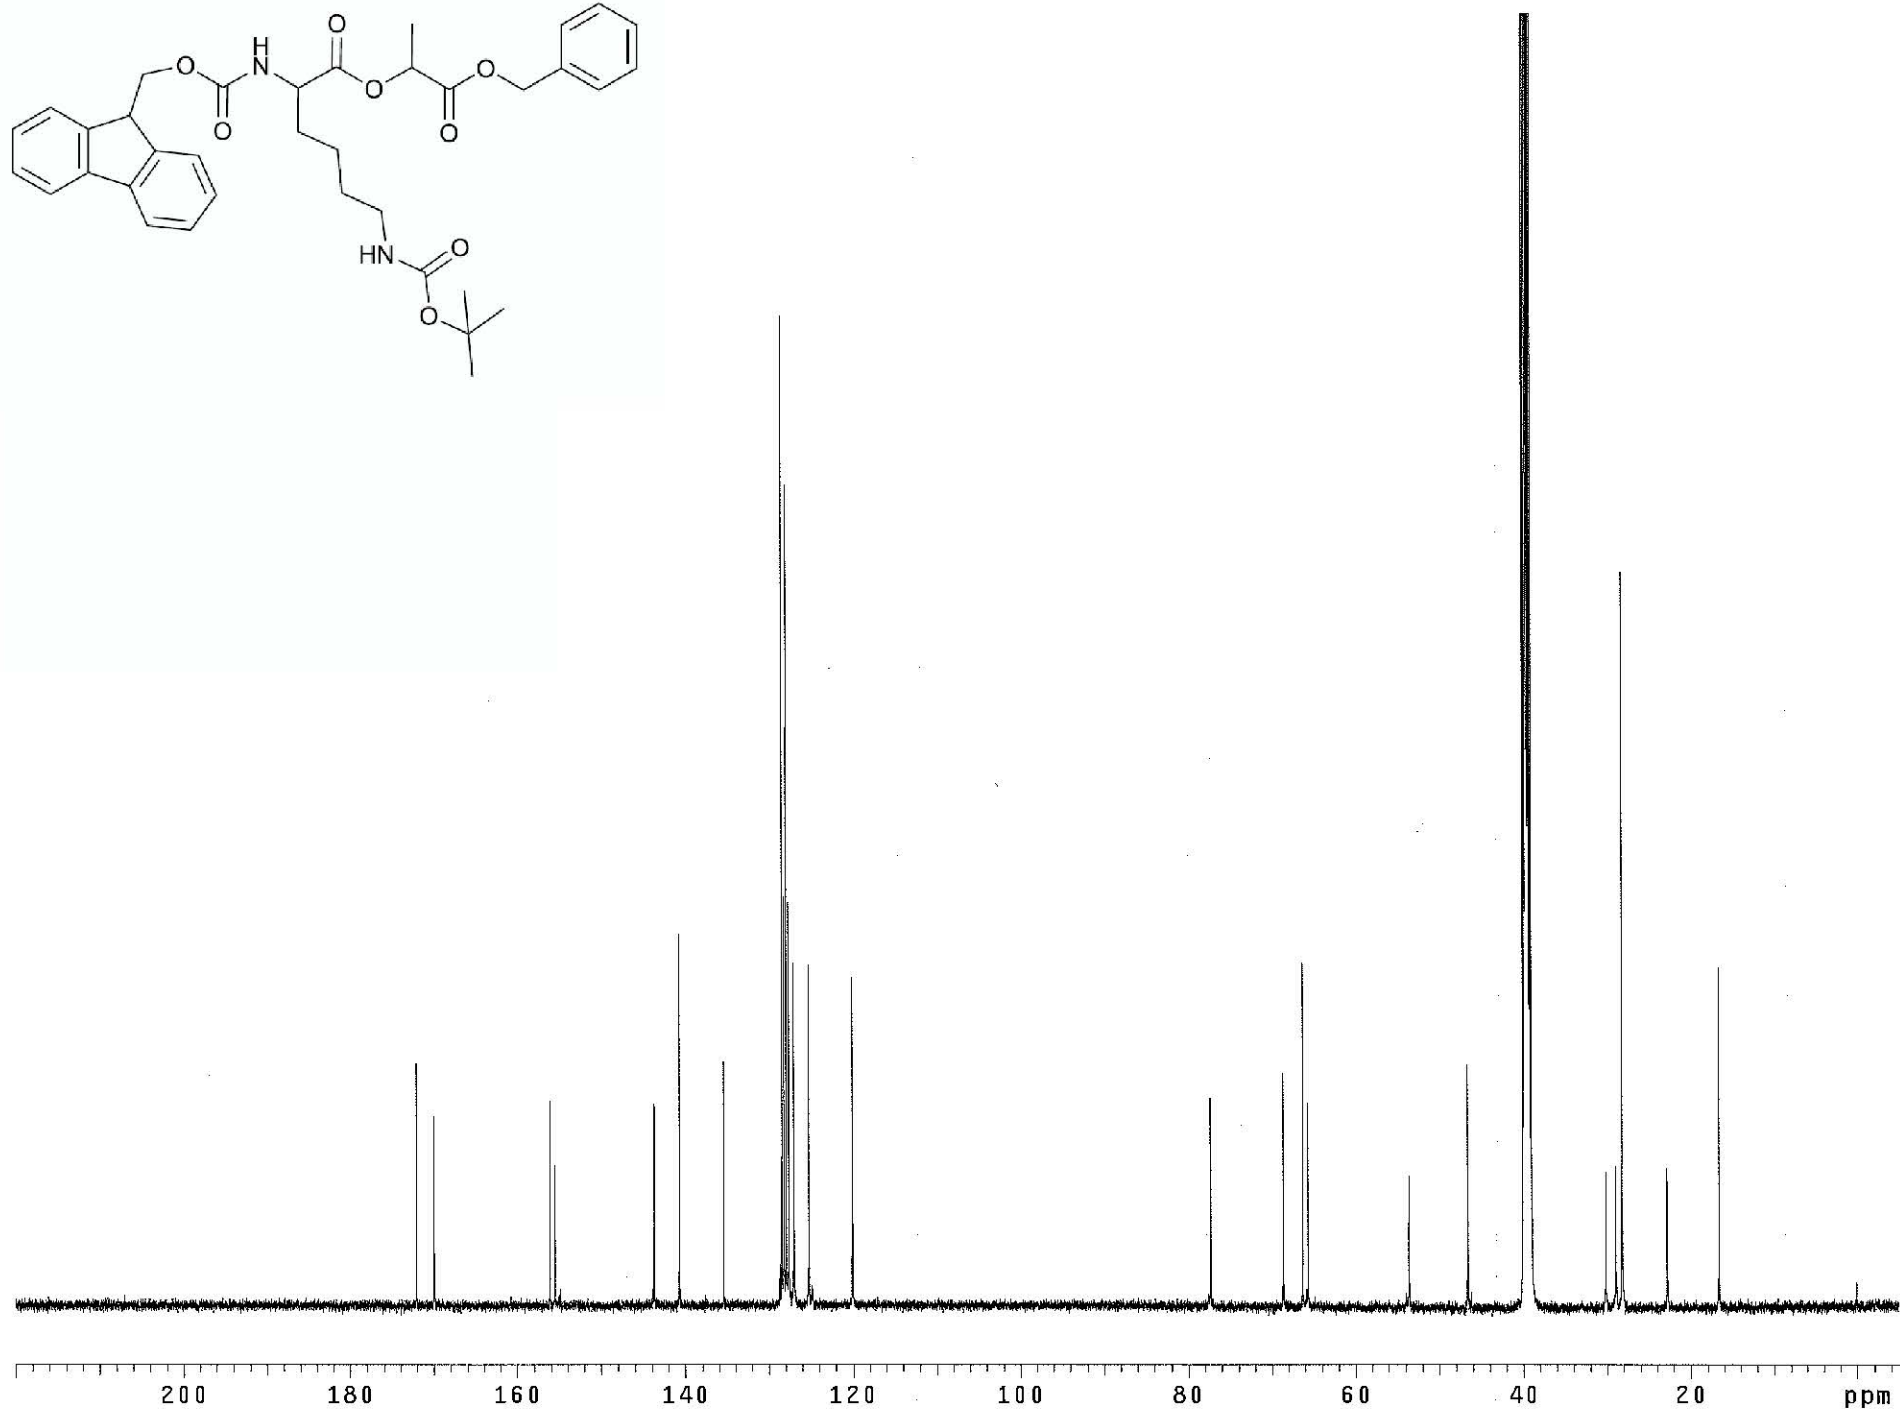

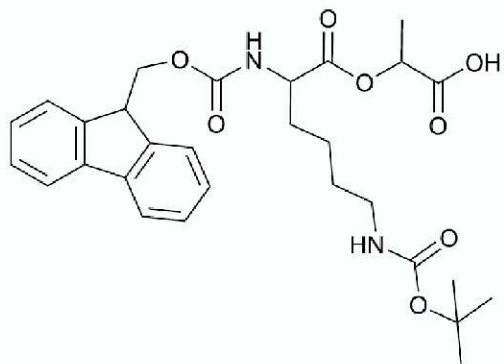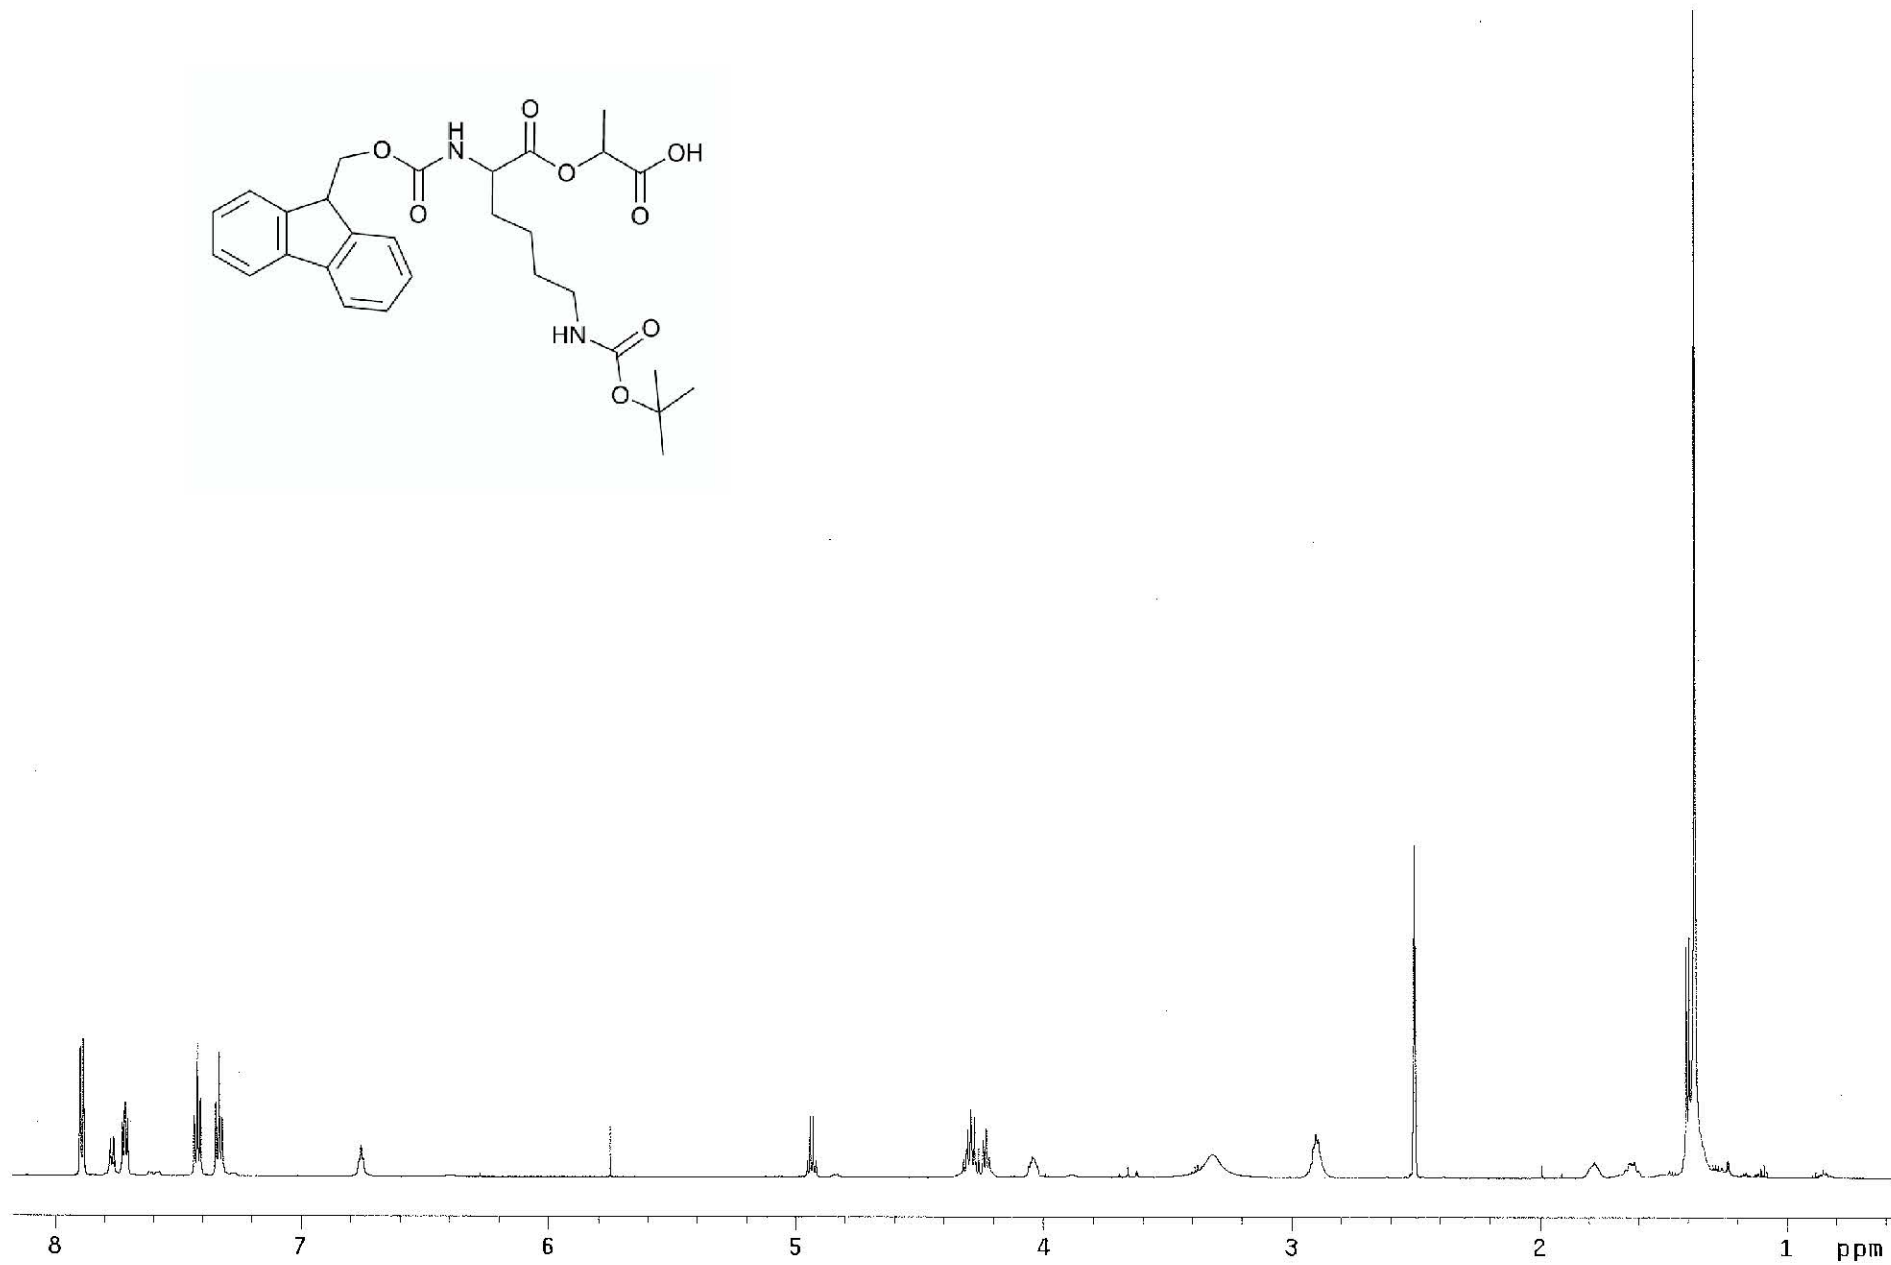

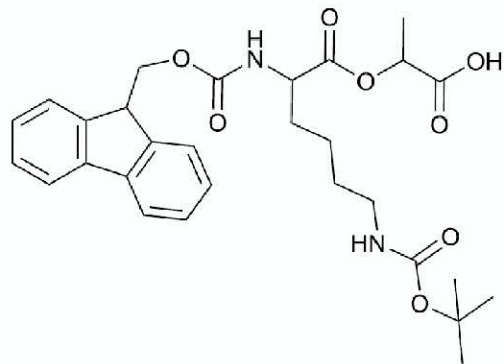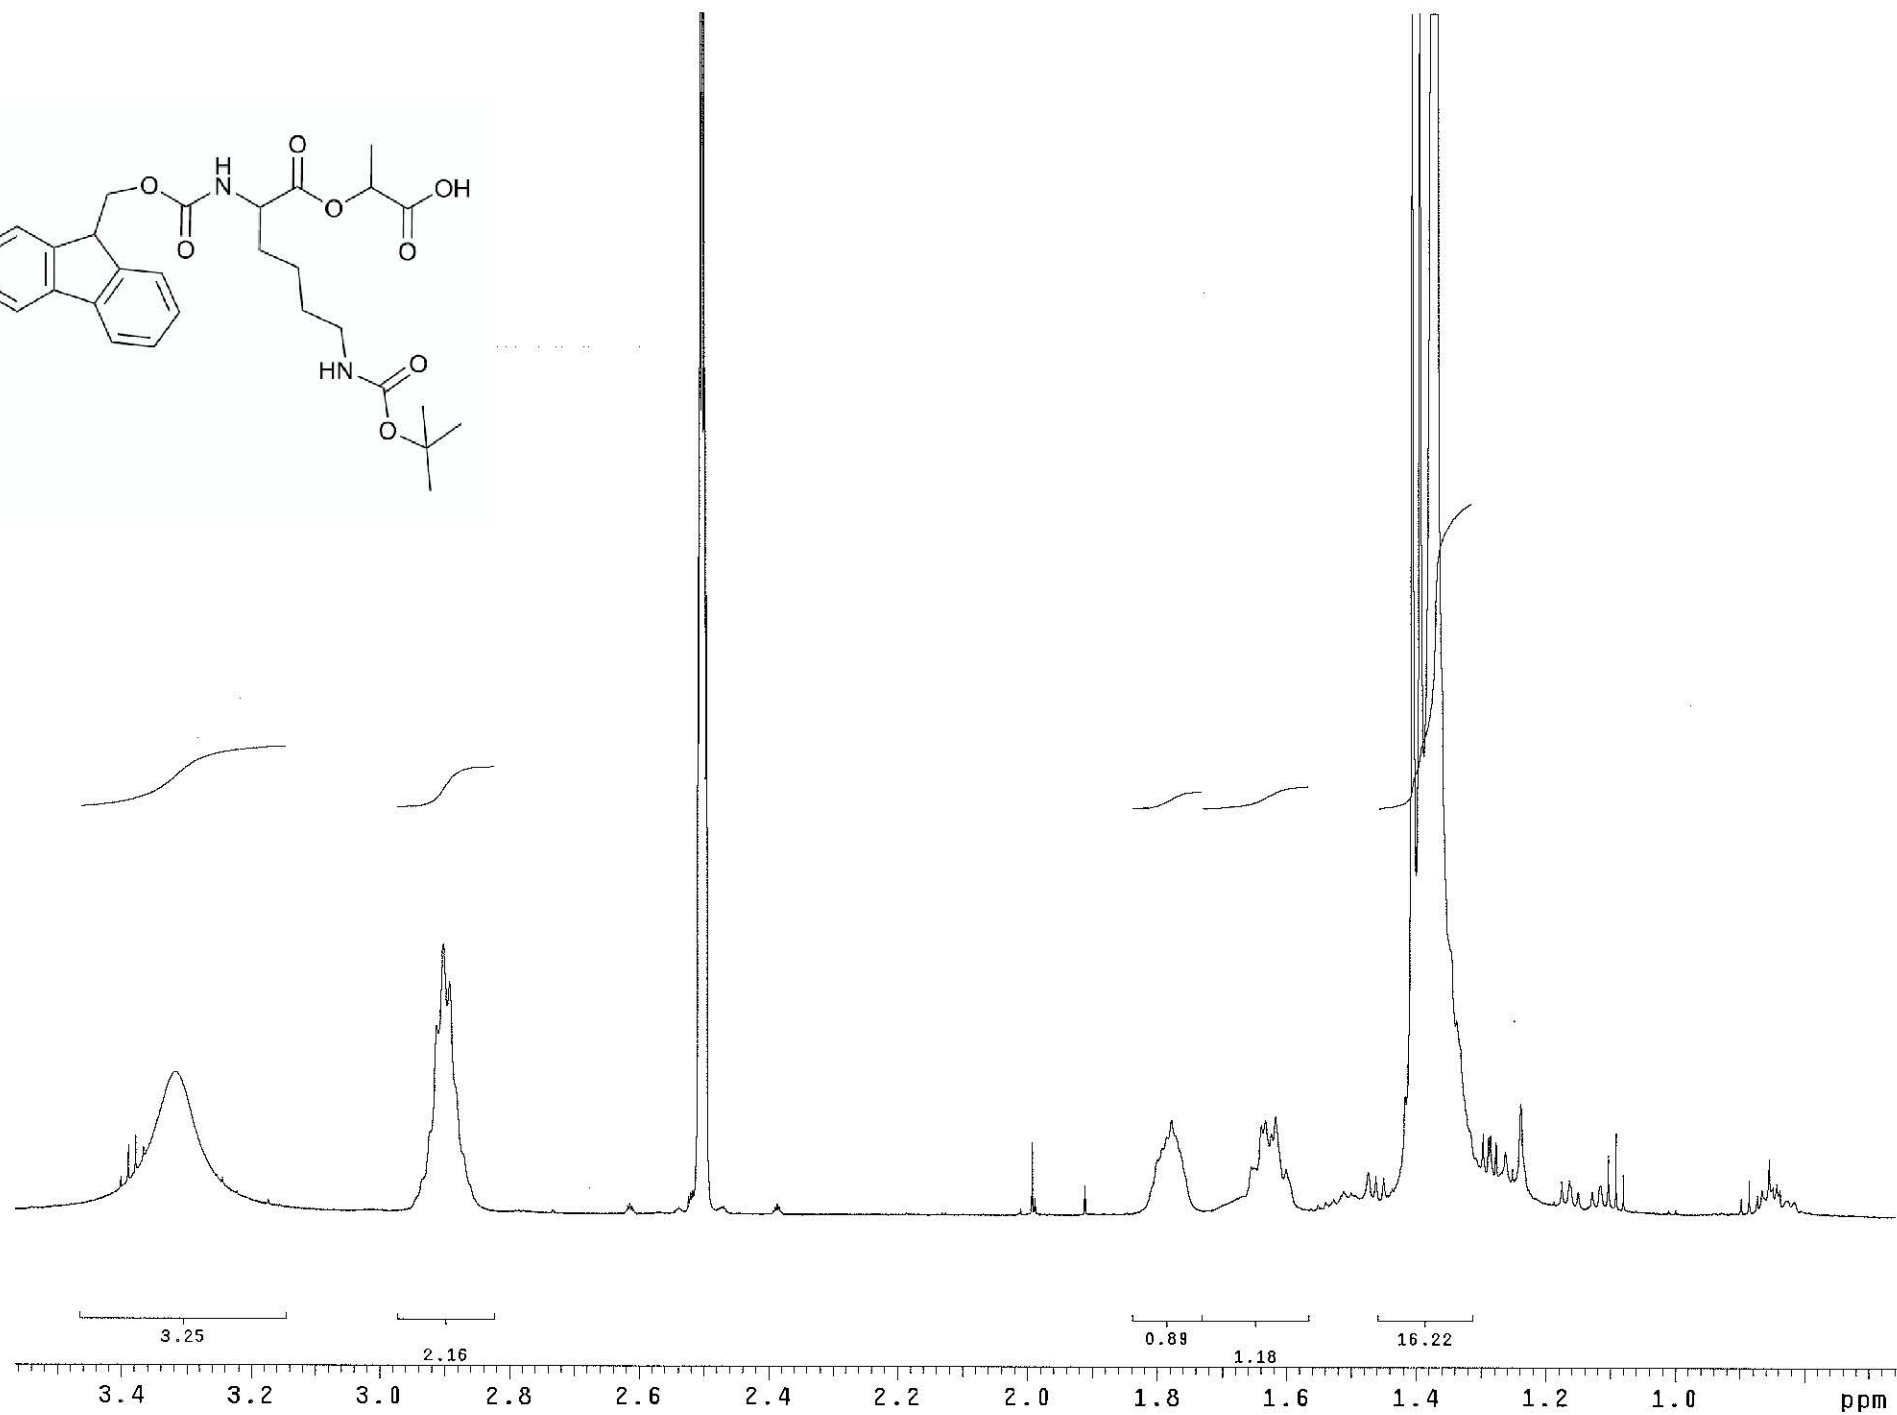

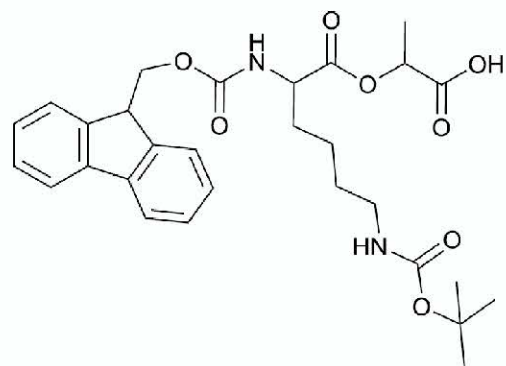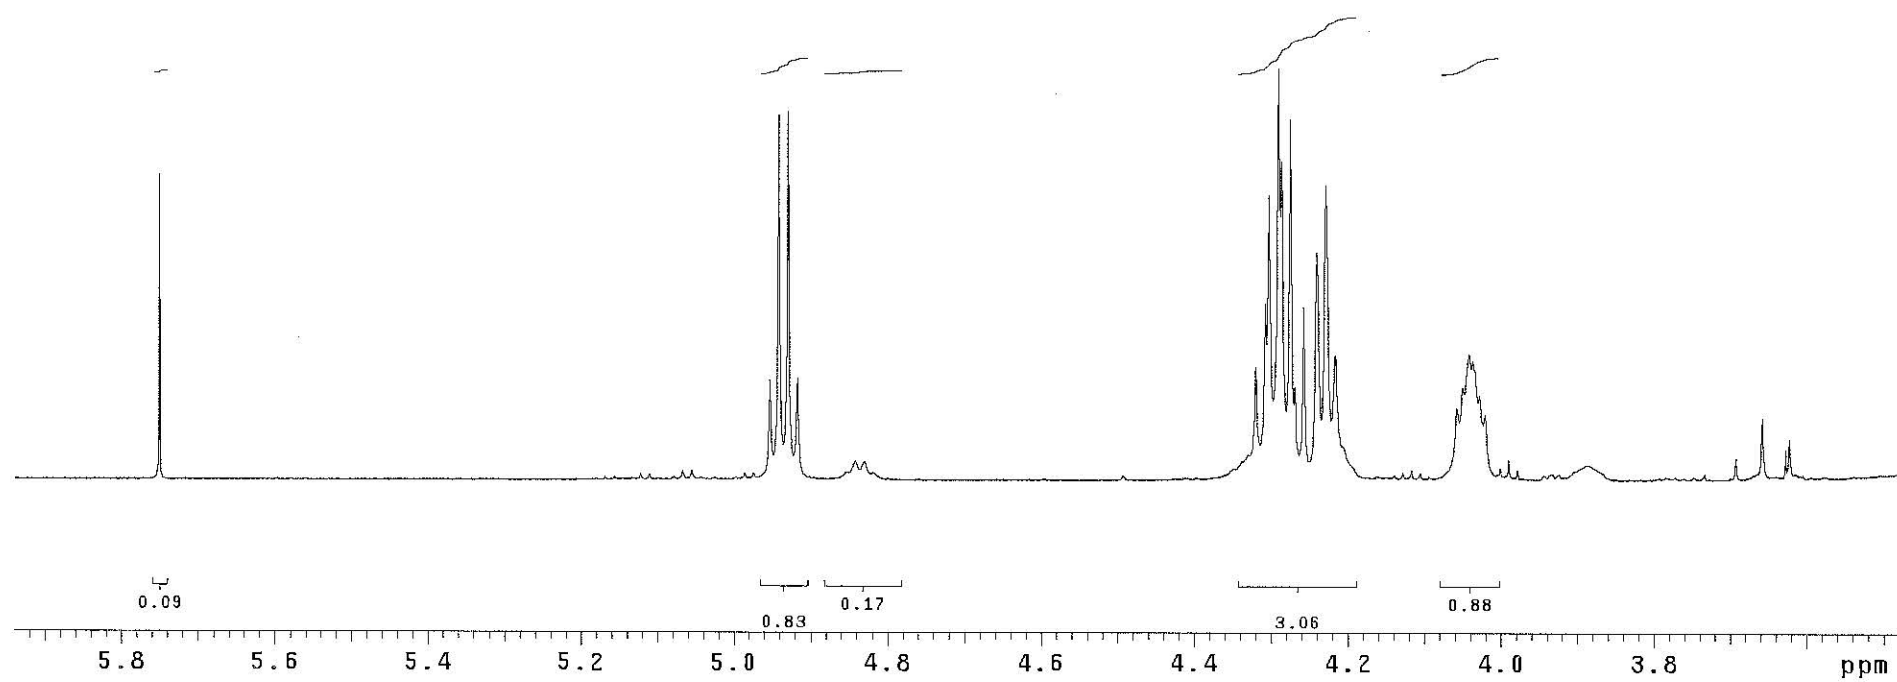



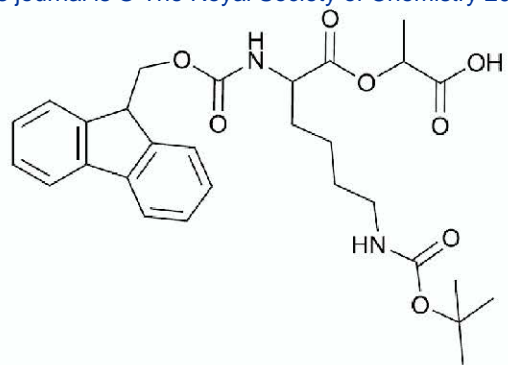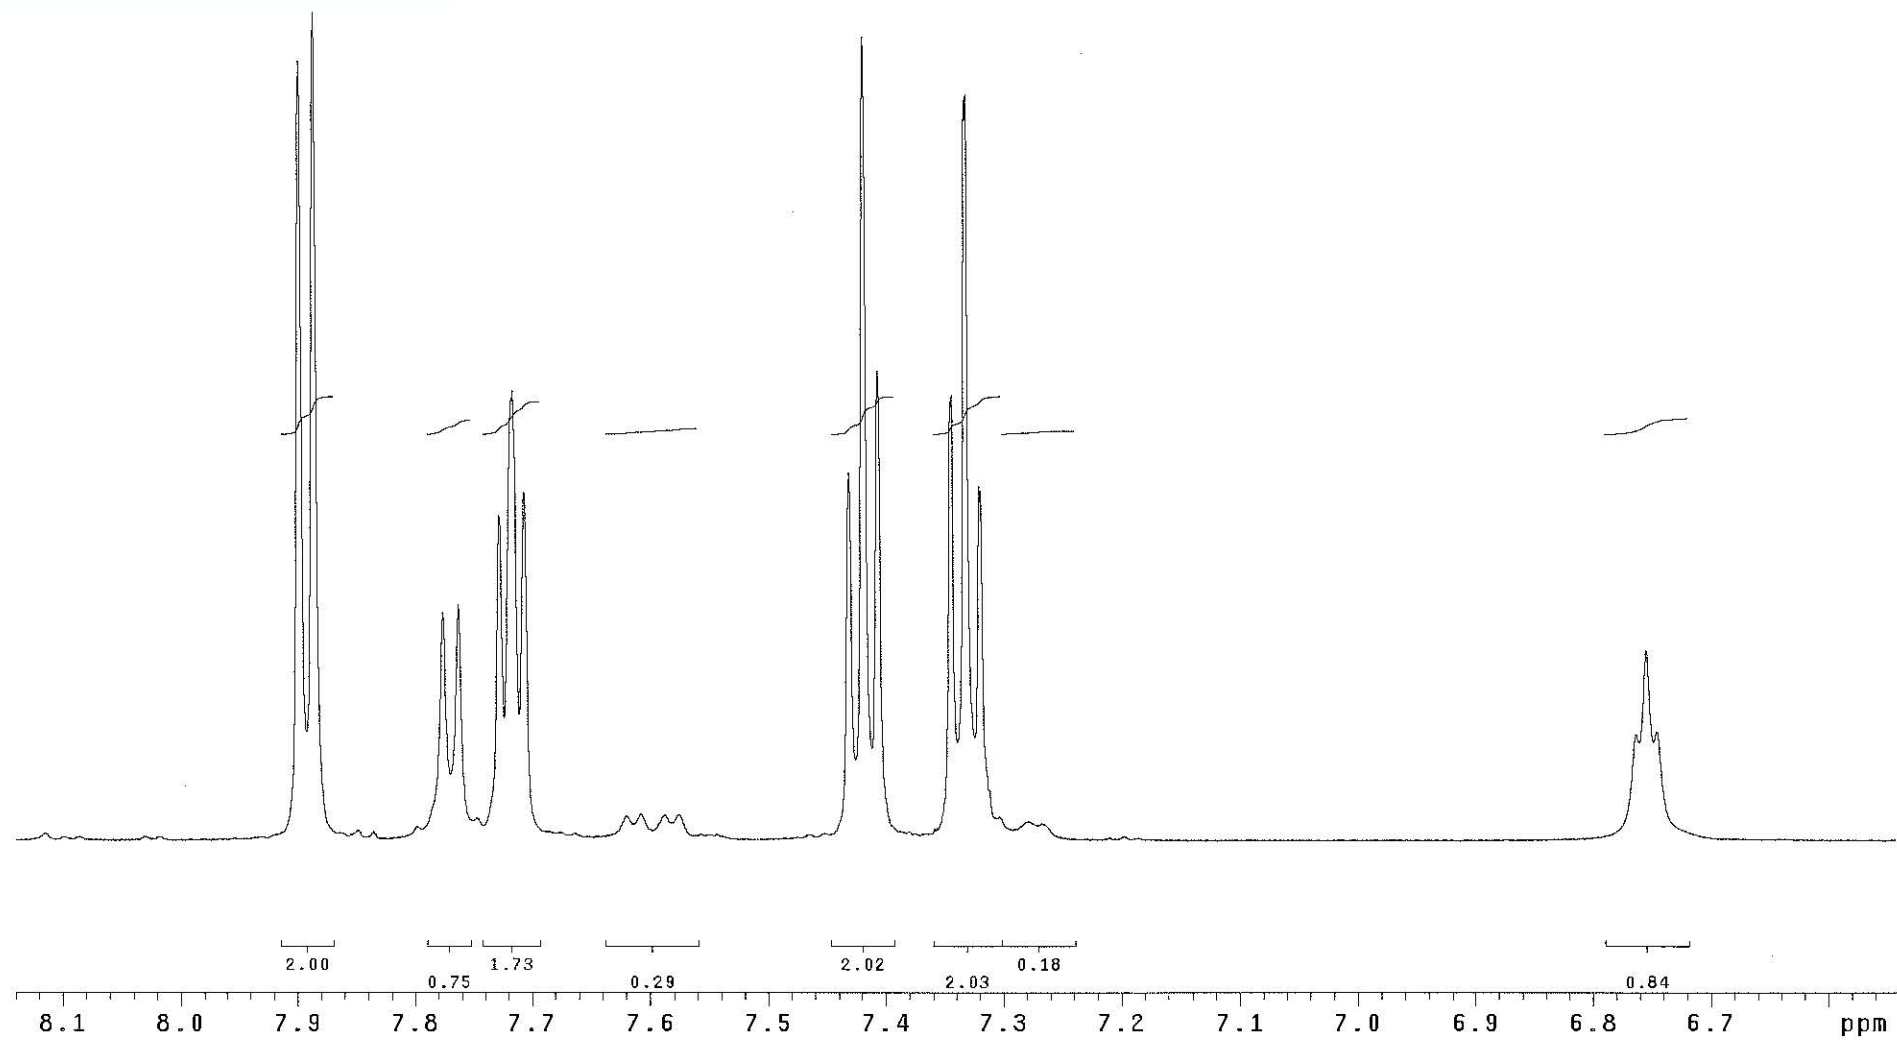

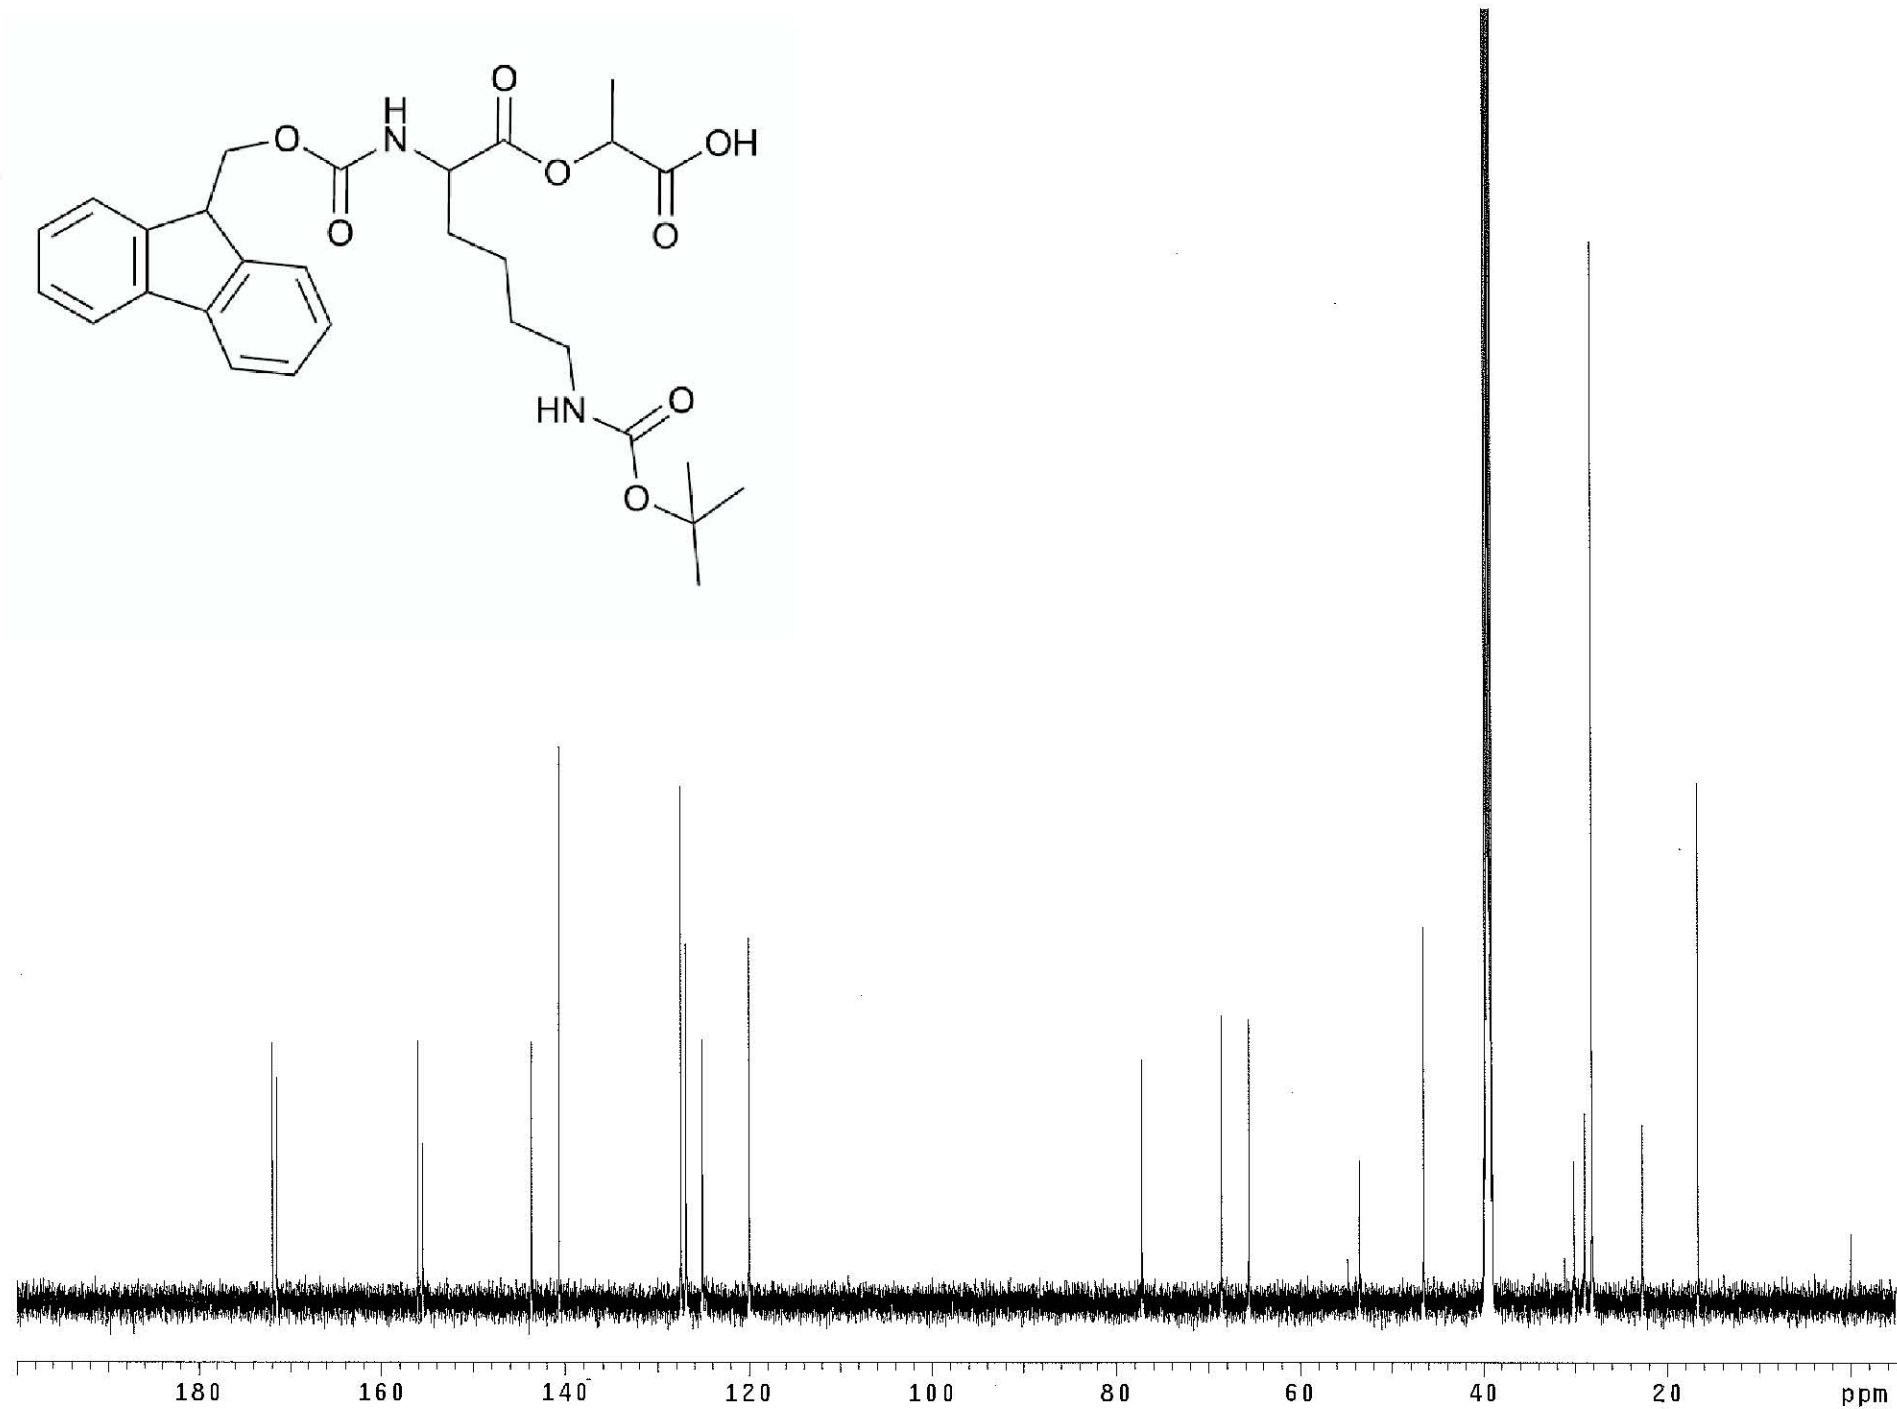

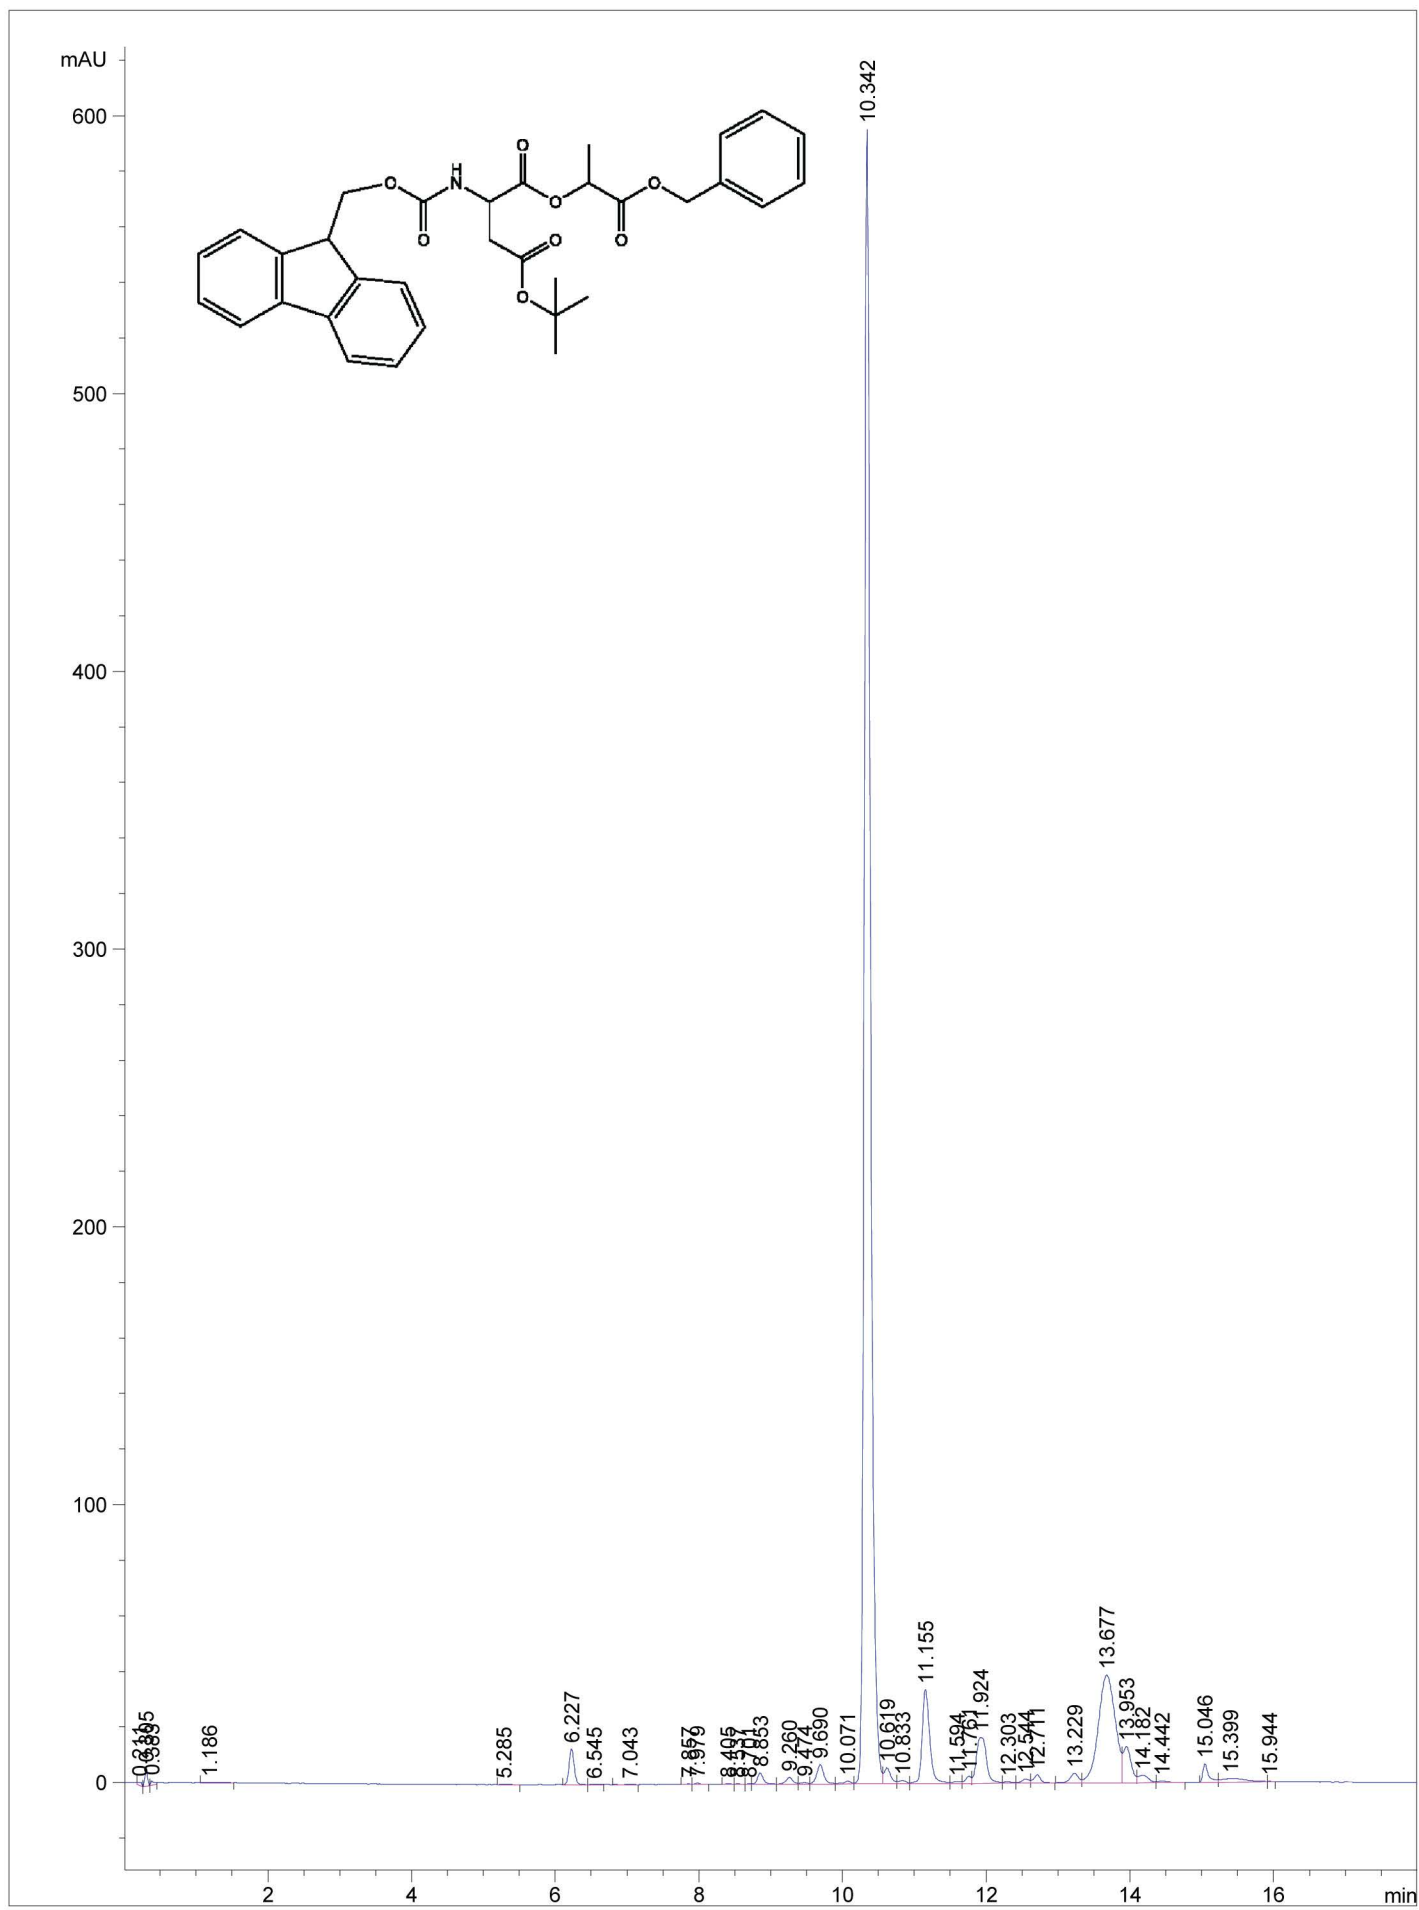

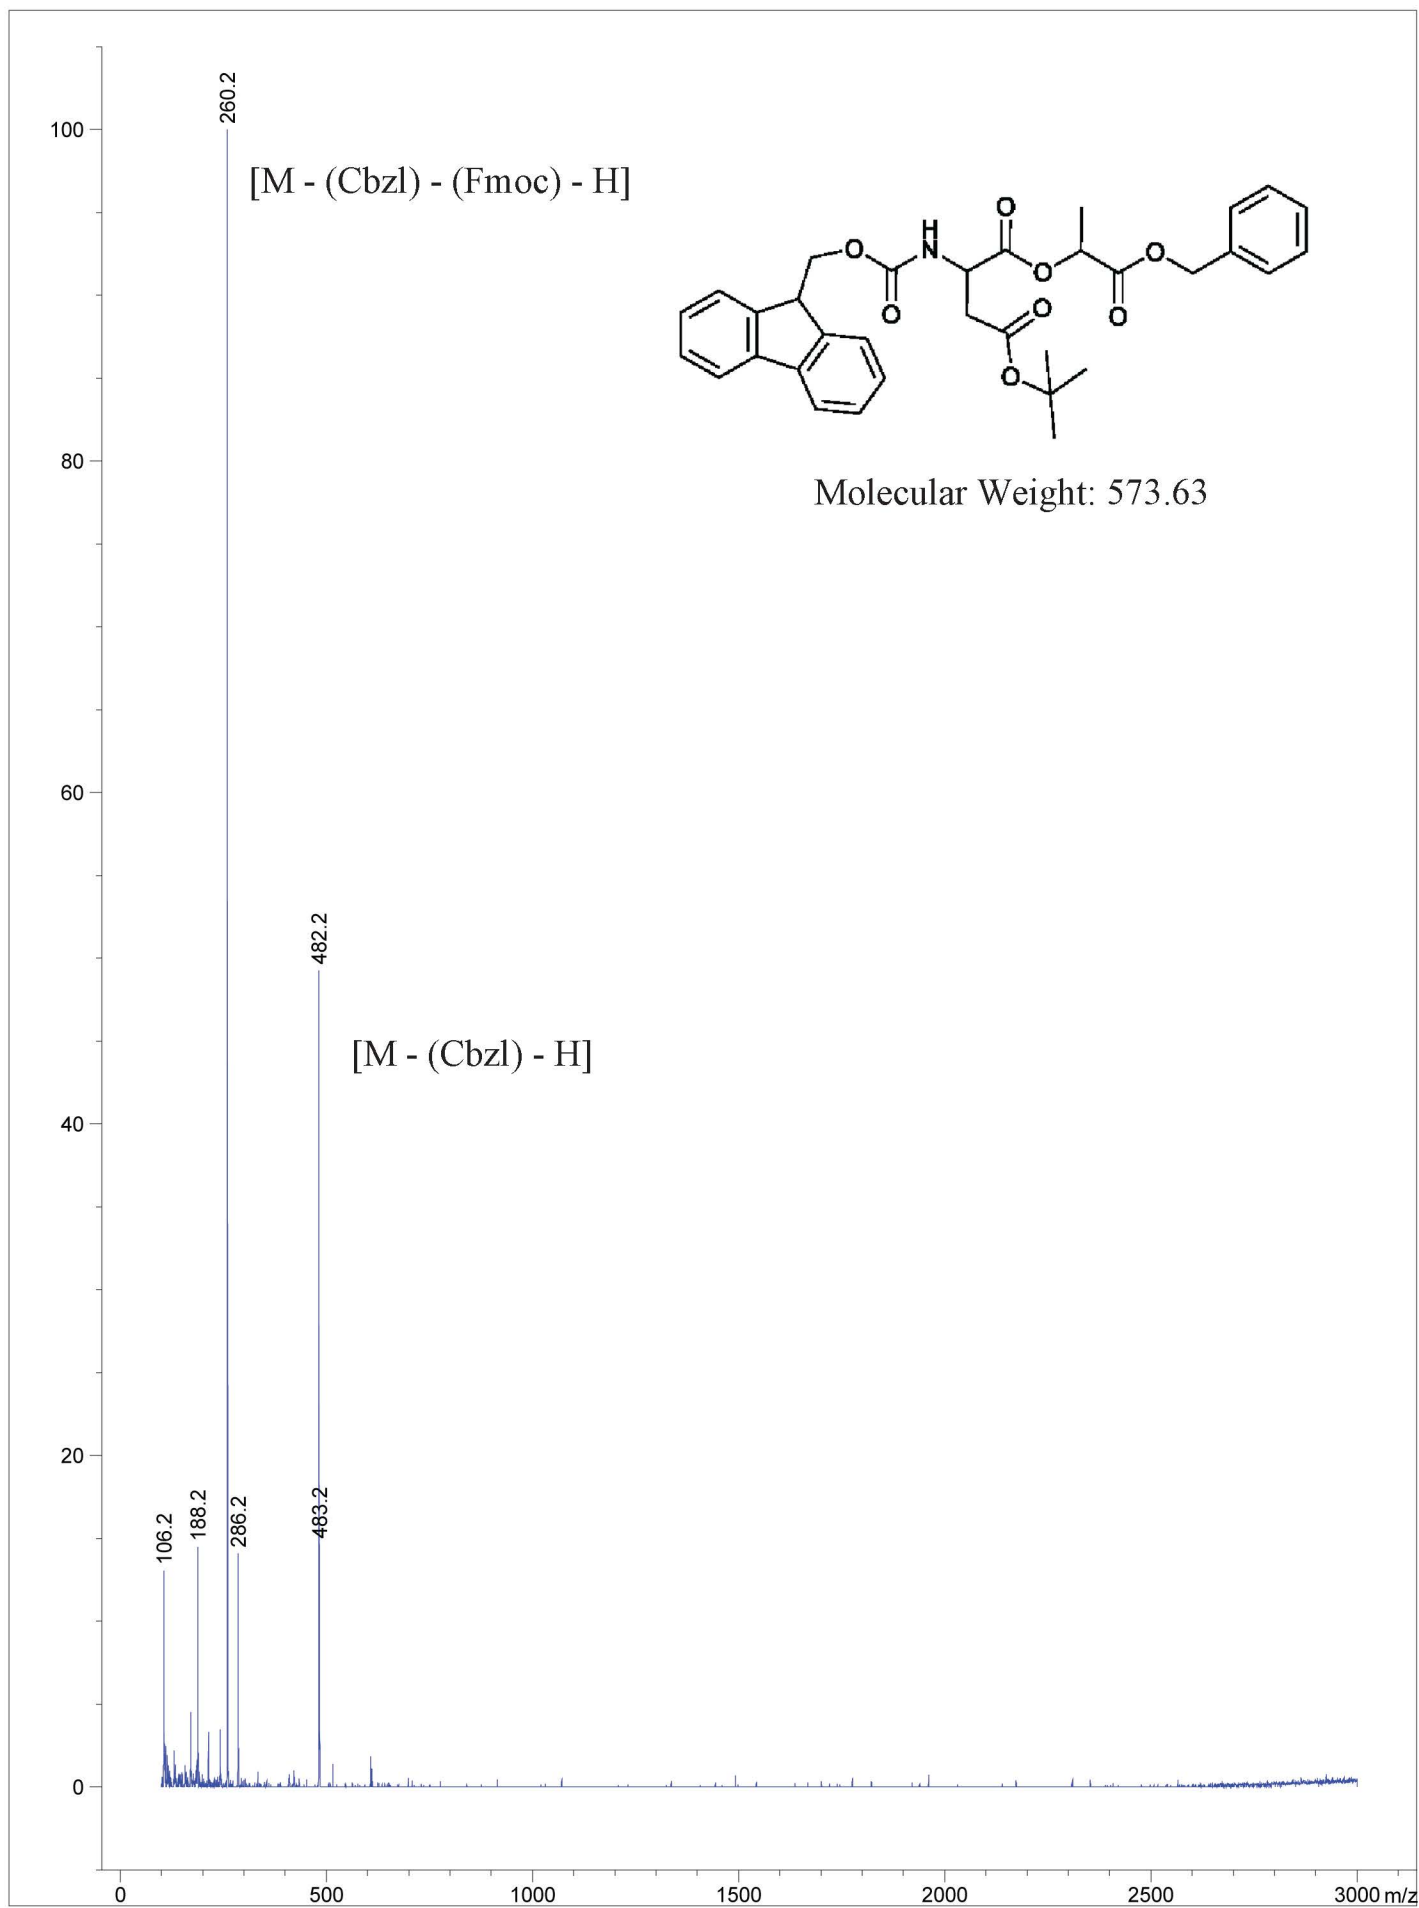

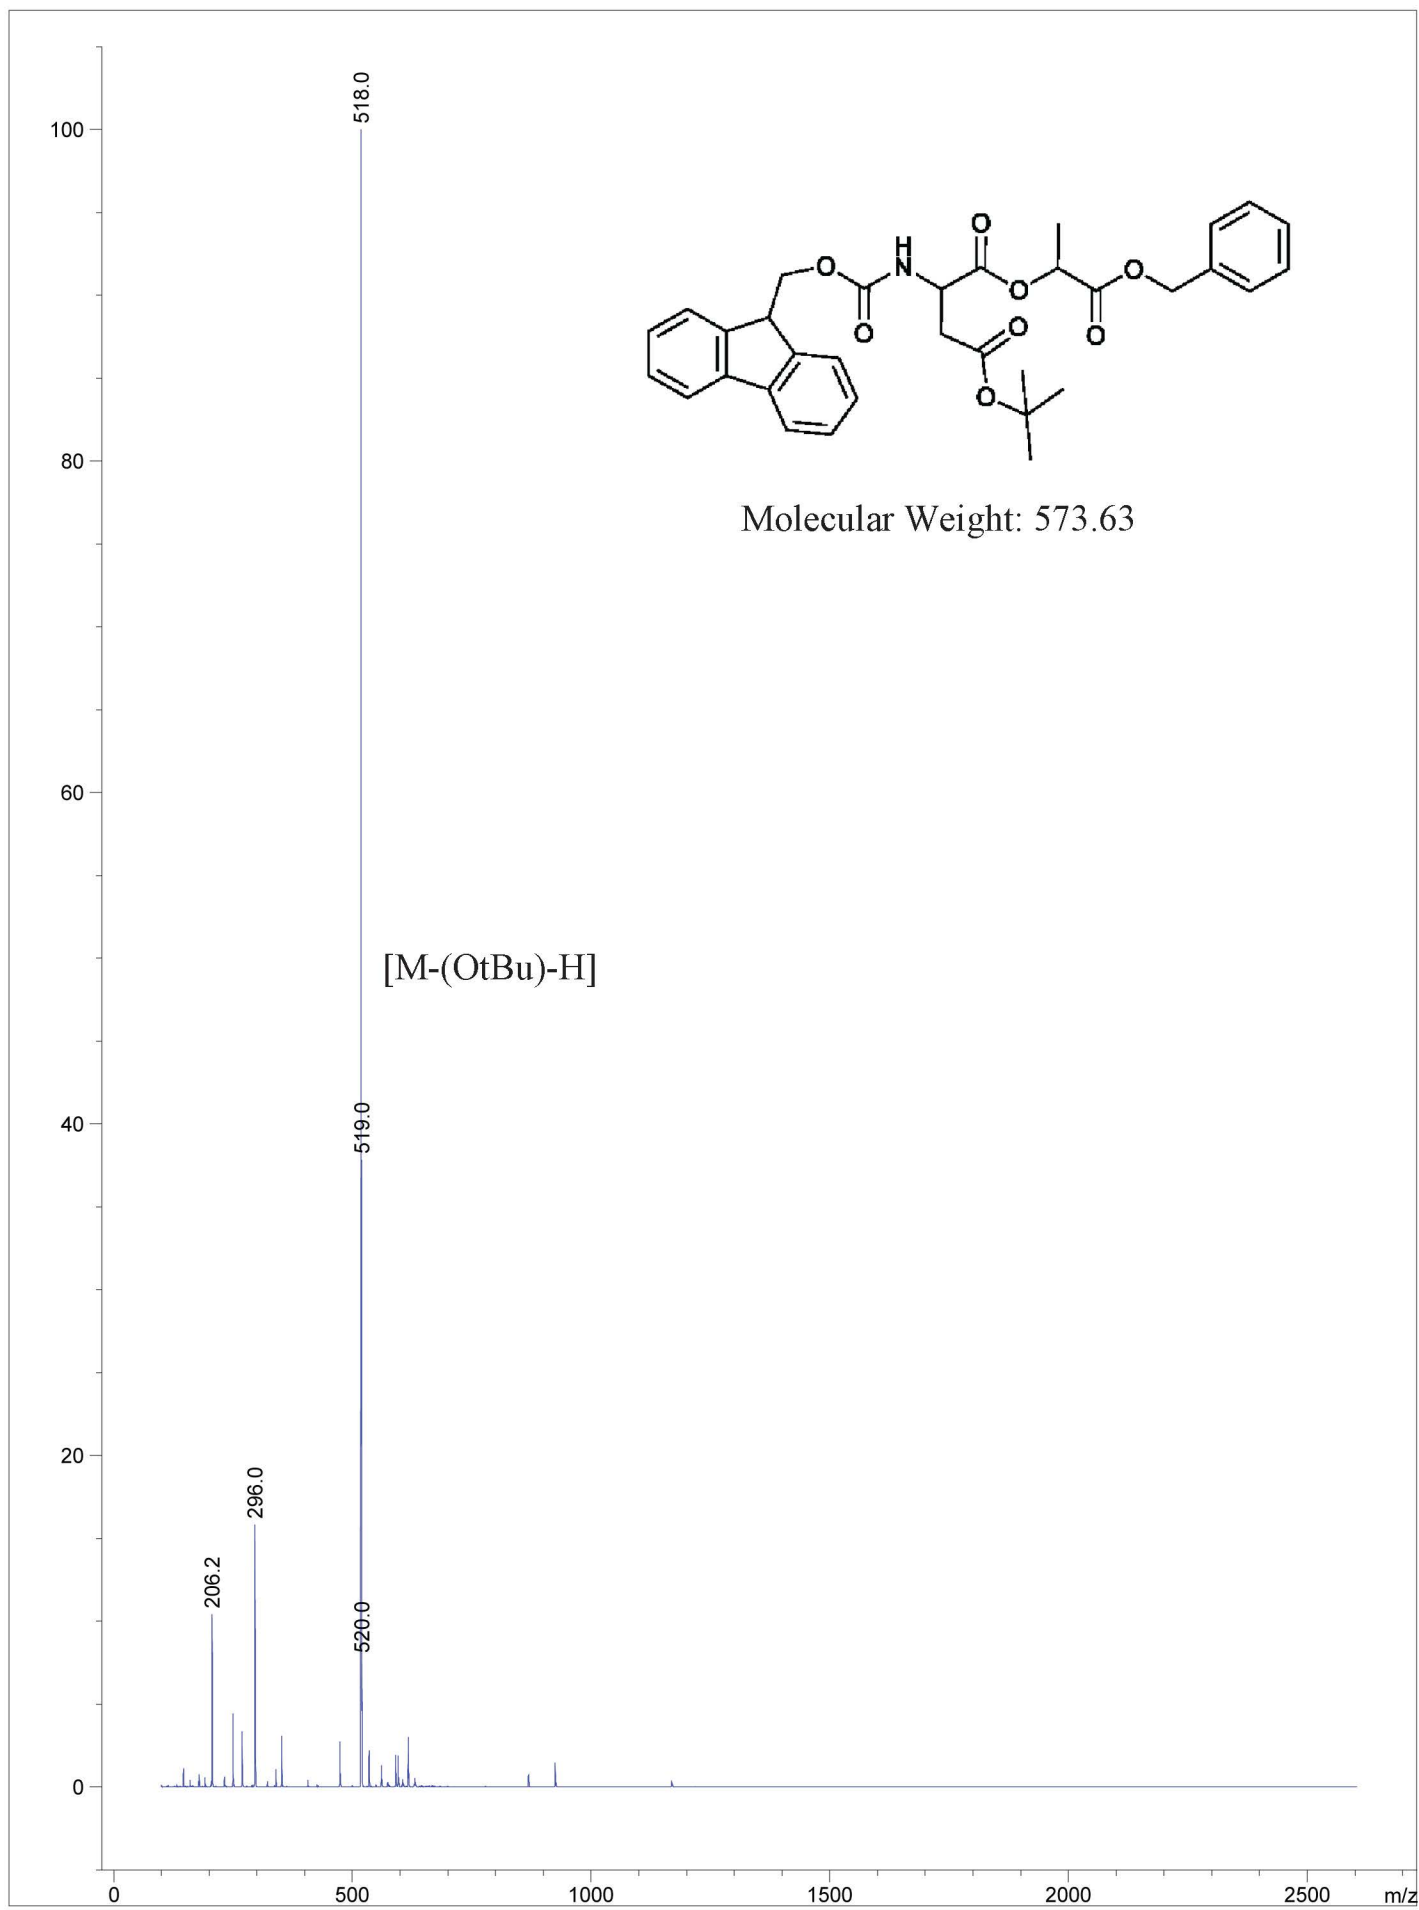

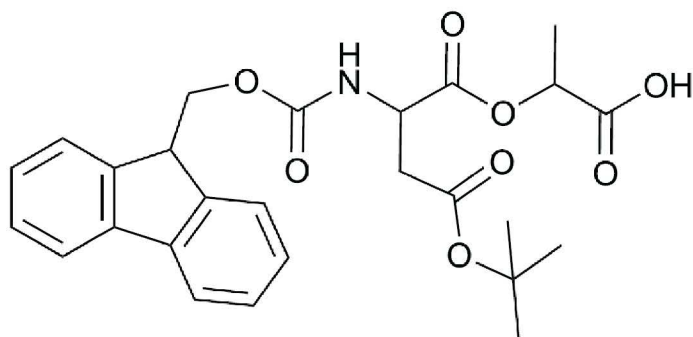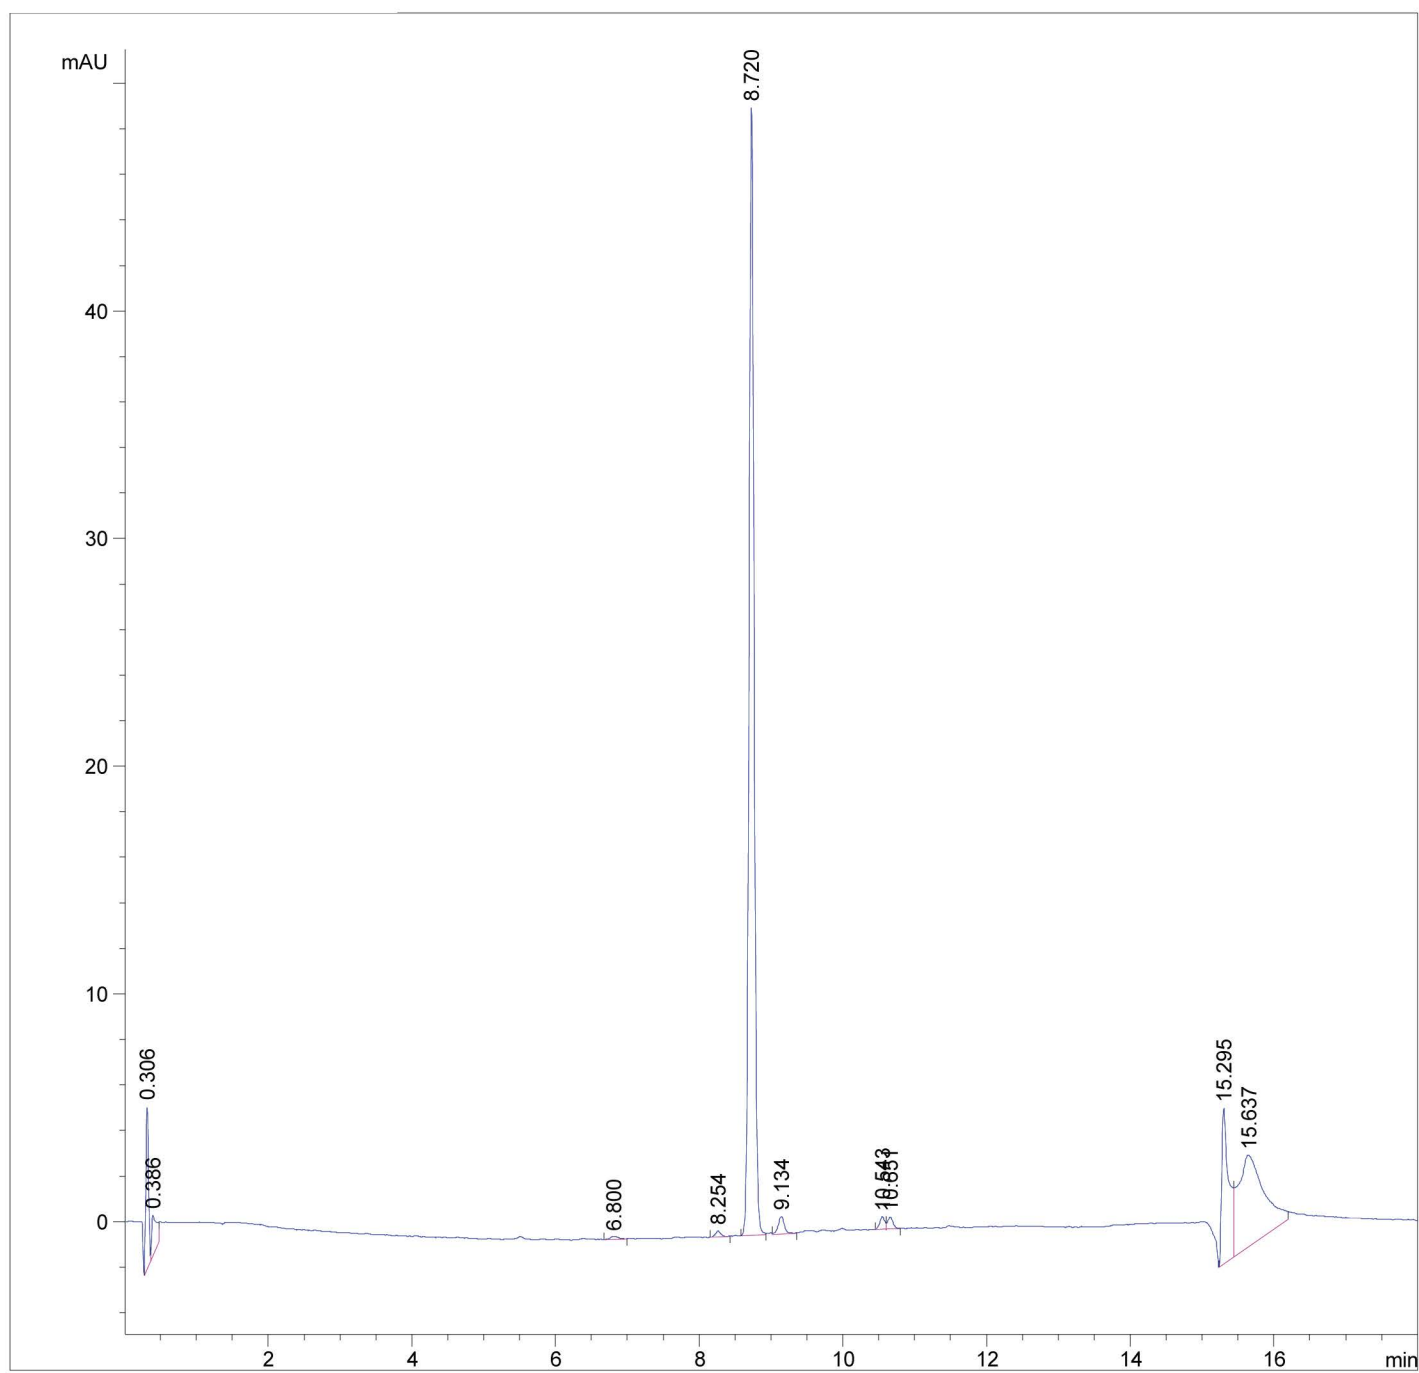

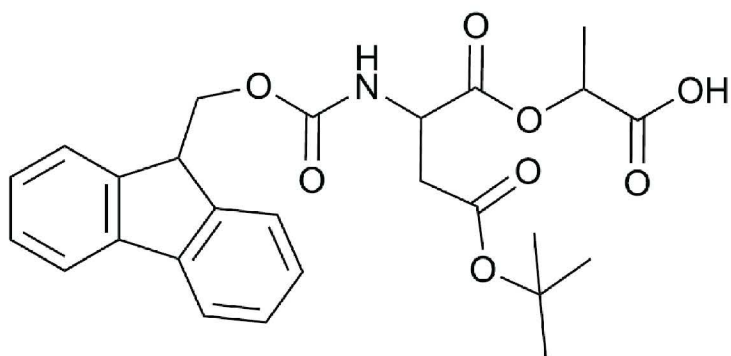

Molecular Weight: 481.53

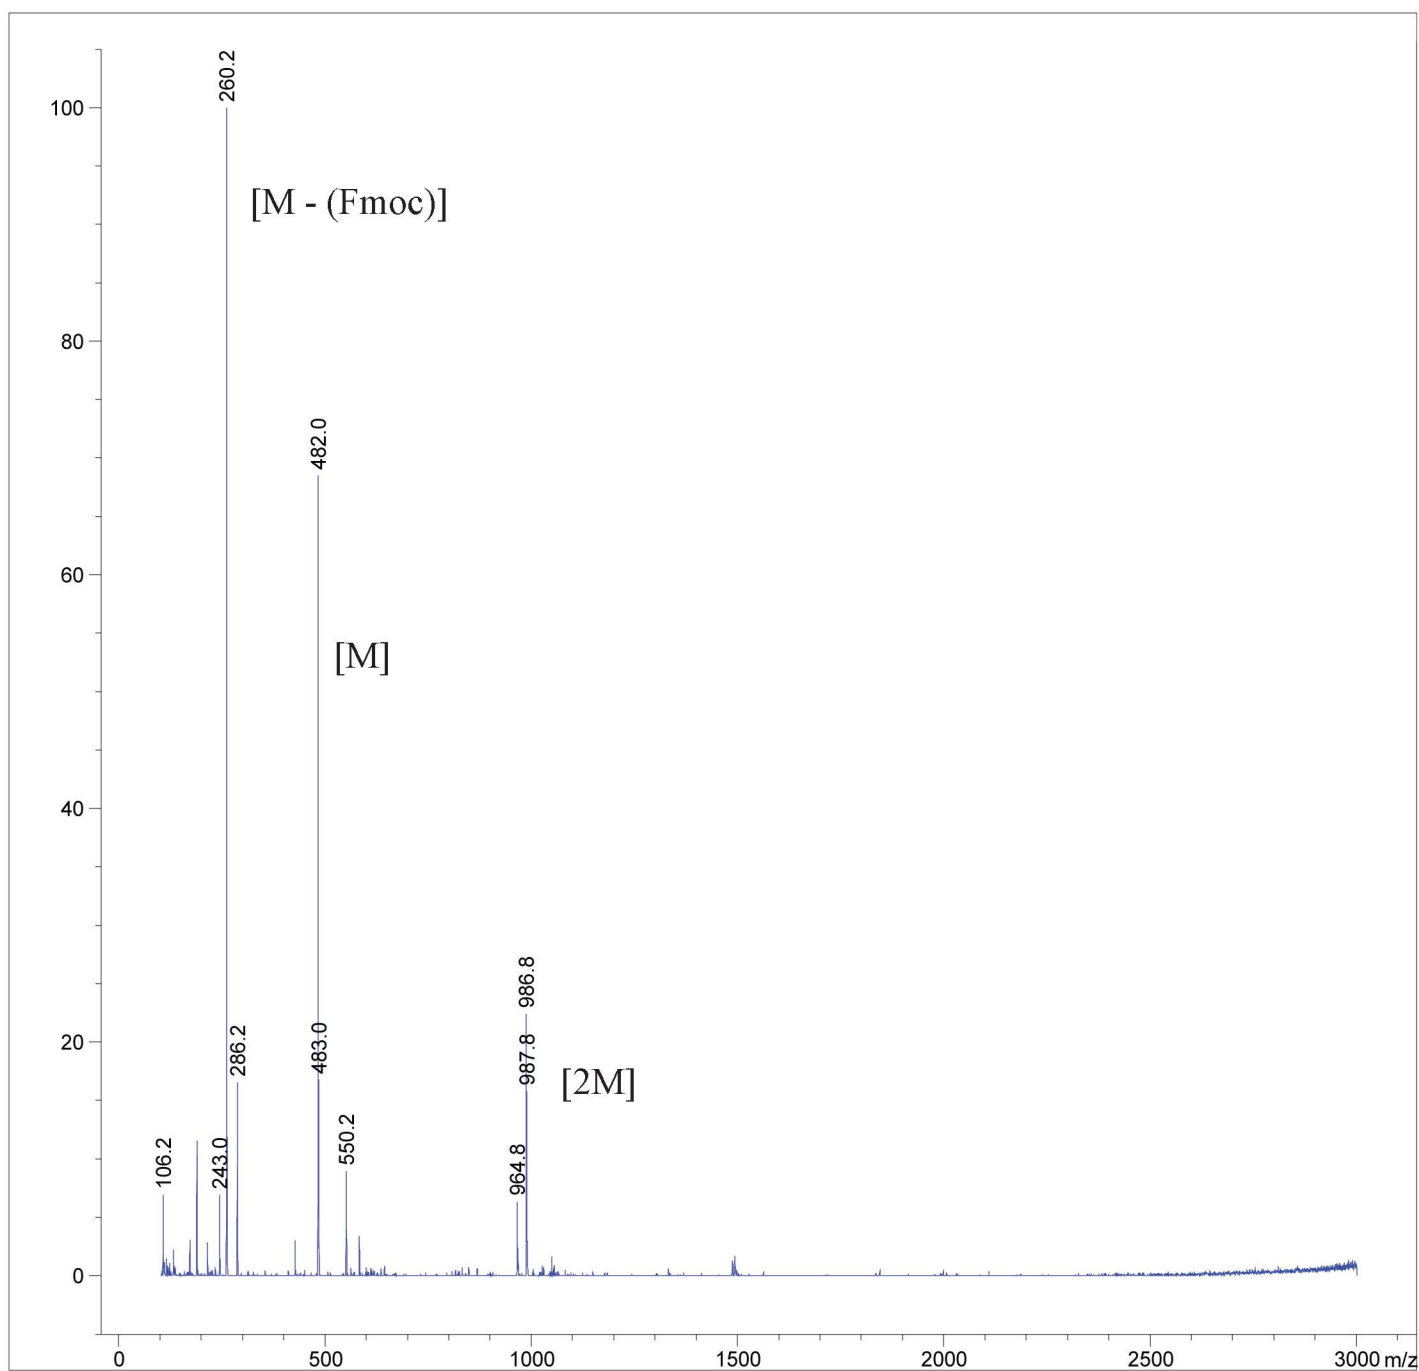

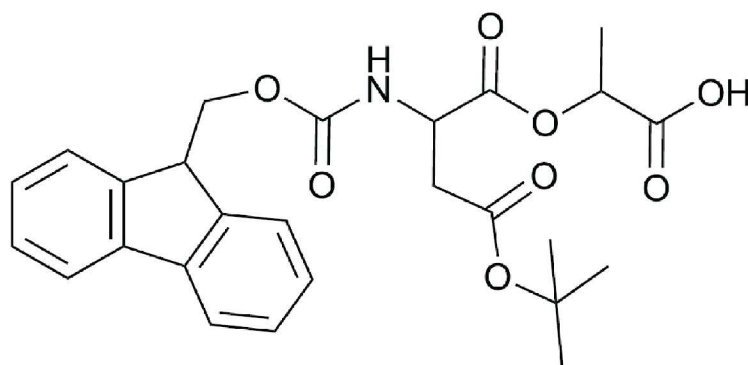

Molecular Weight: 481.51

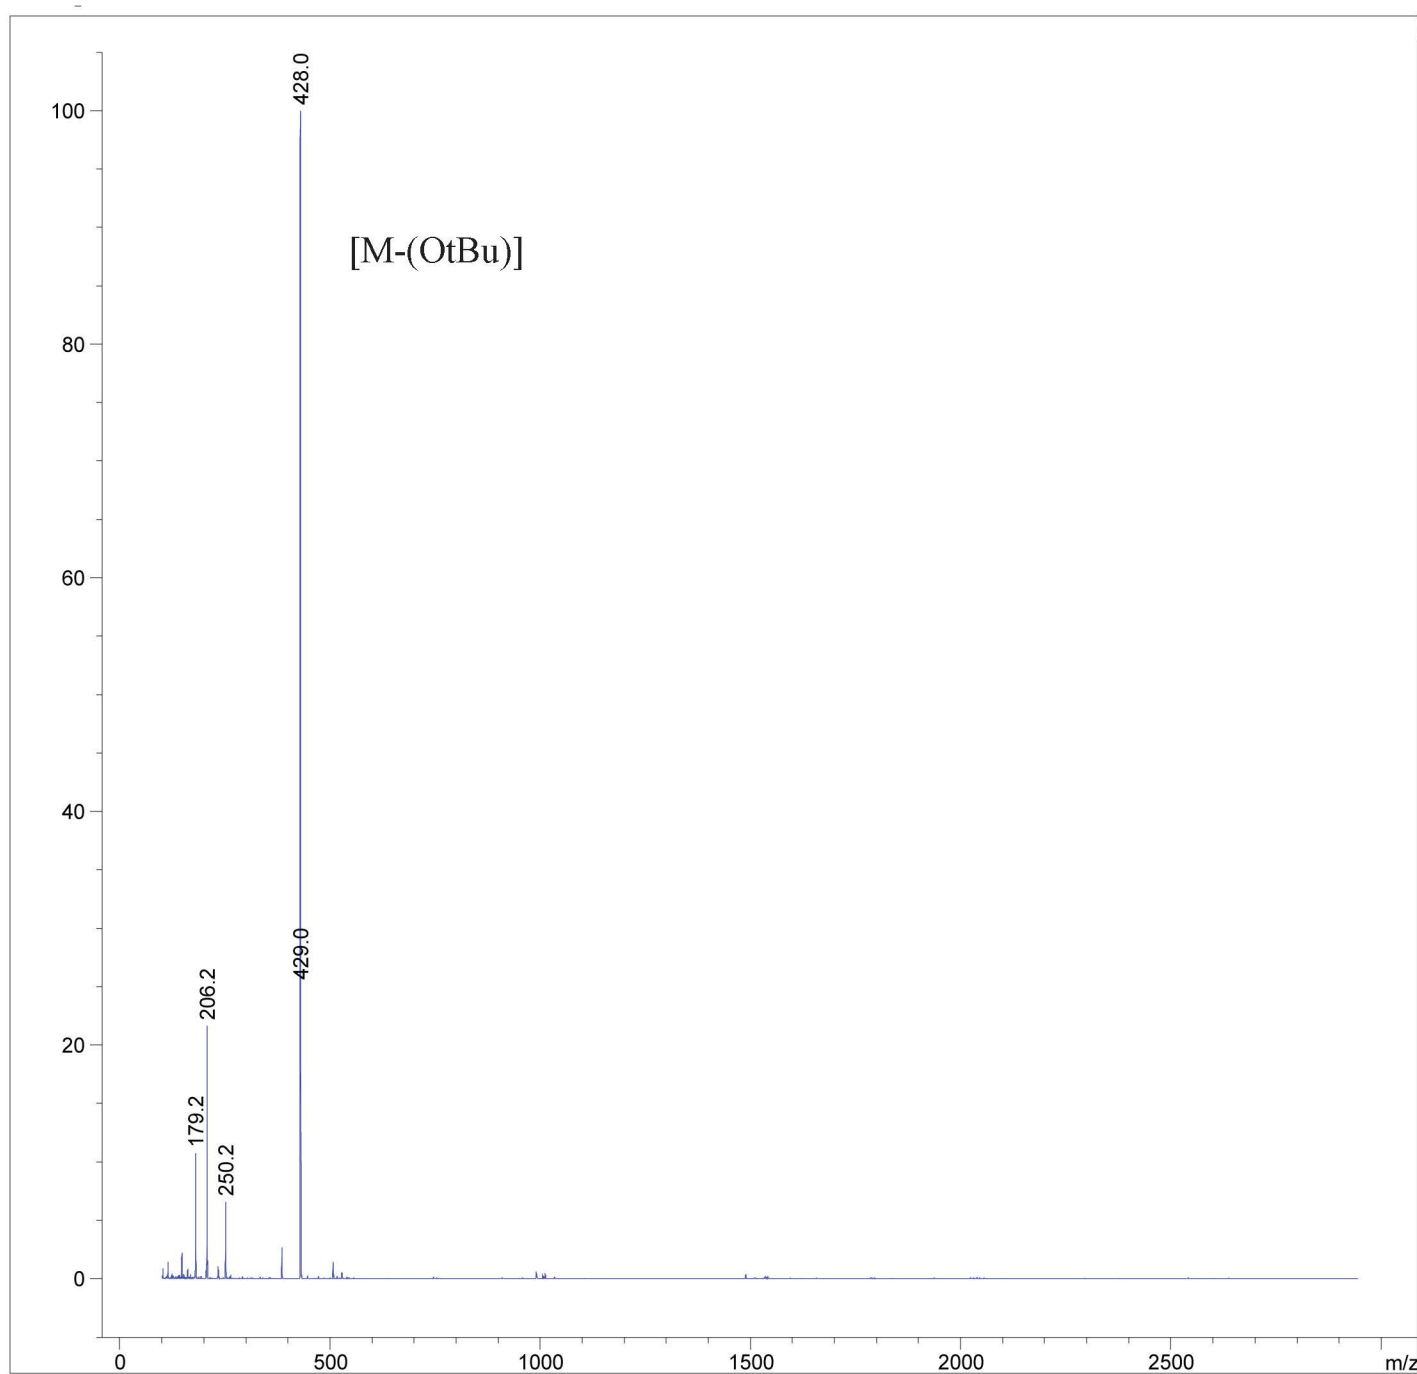





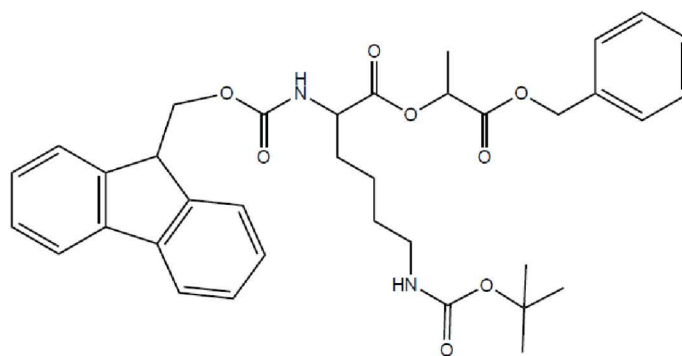

Molecular Weight: 630.73

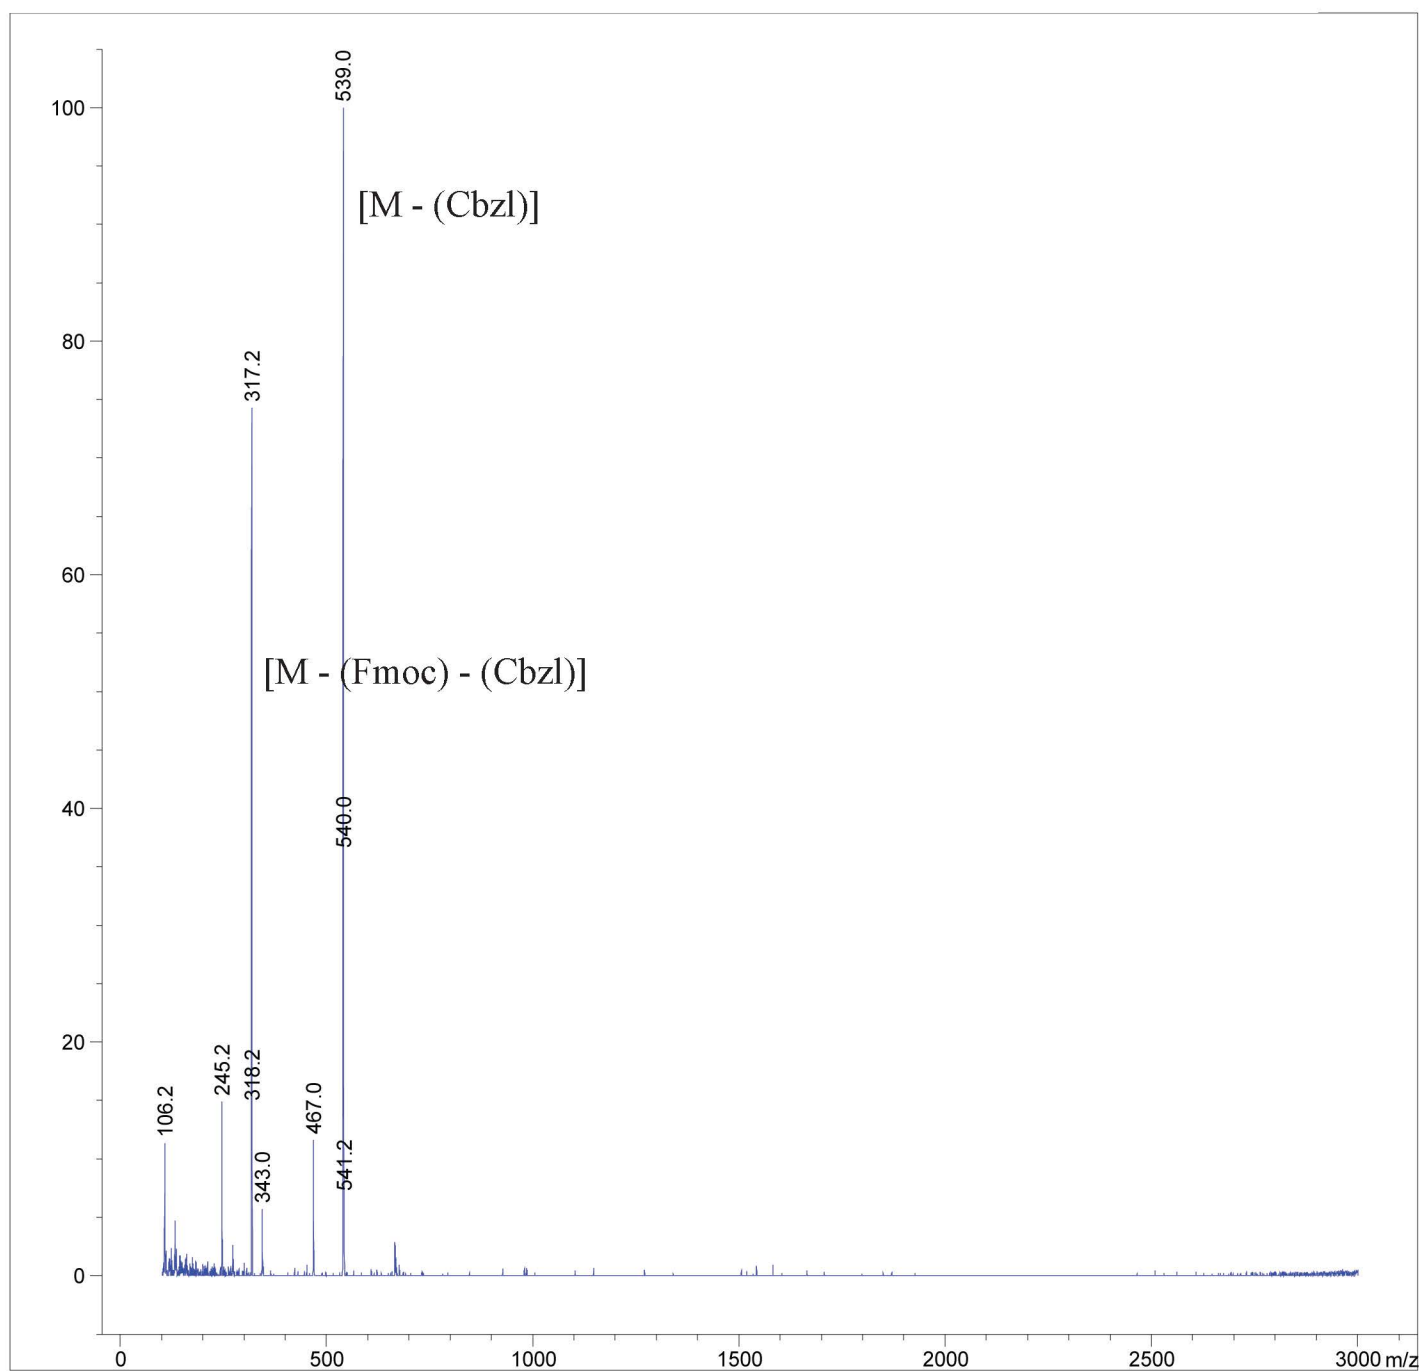

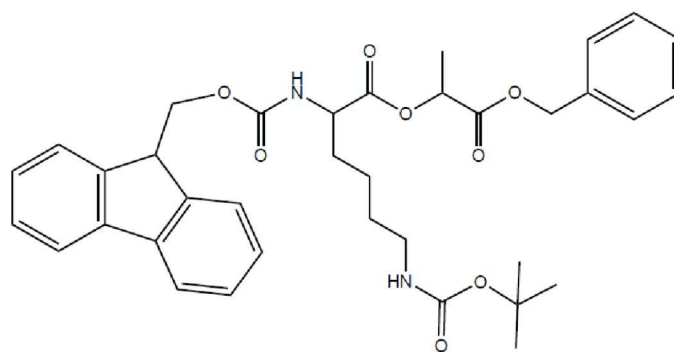

Molecular Weight: 630.73

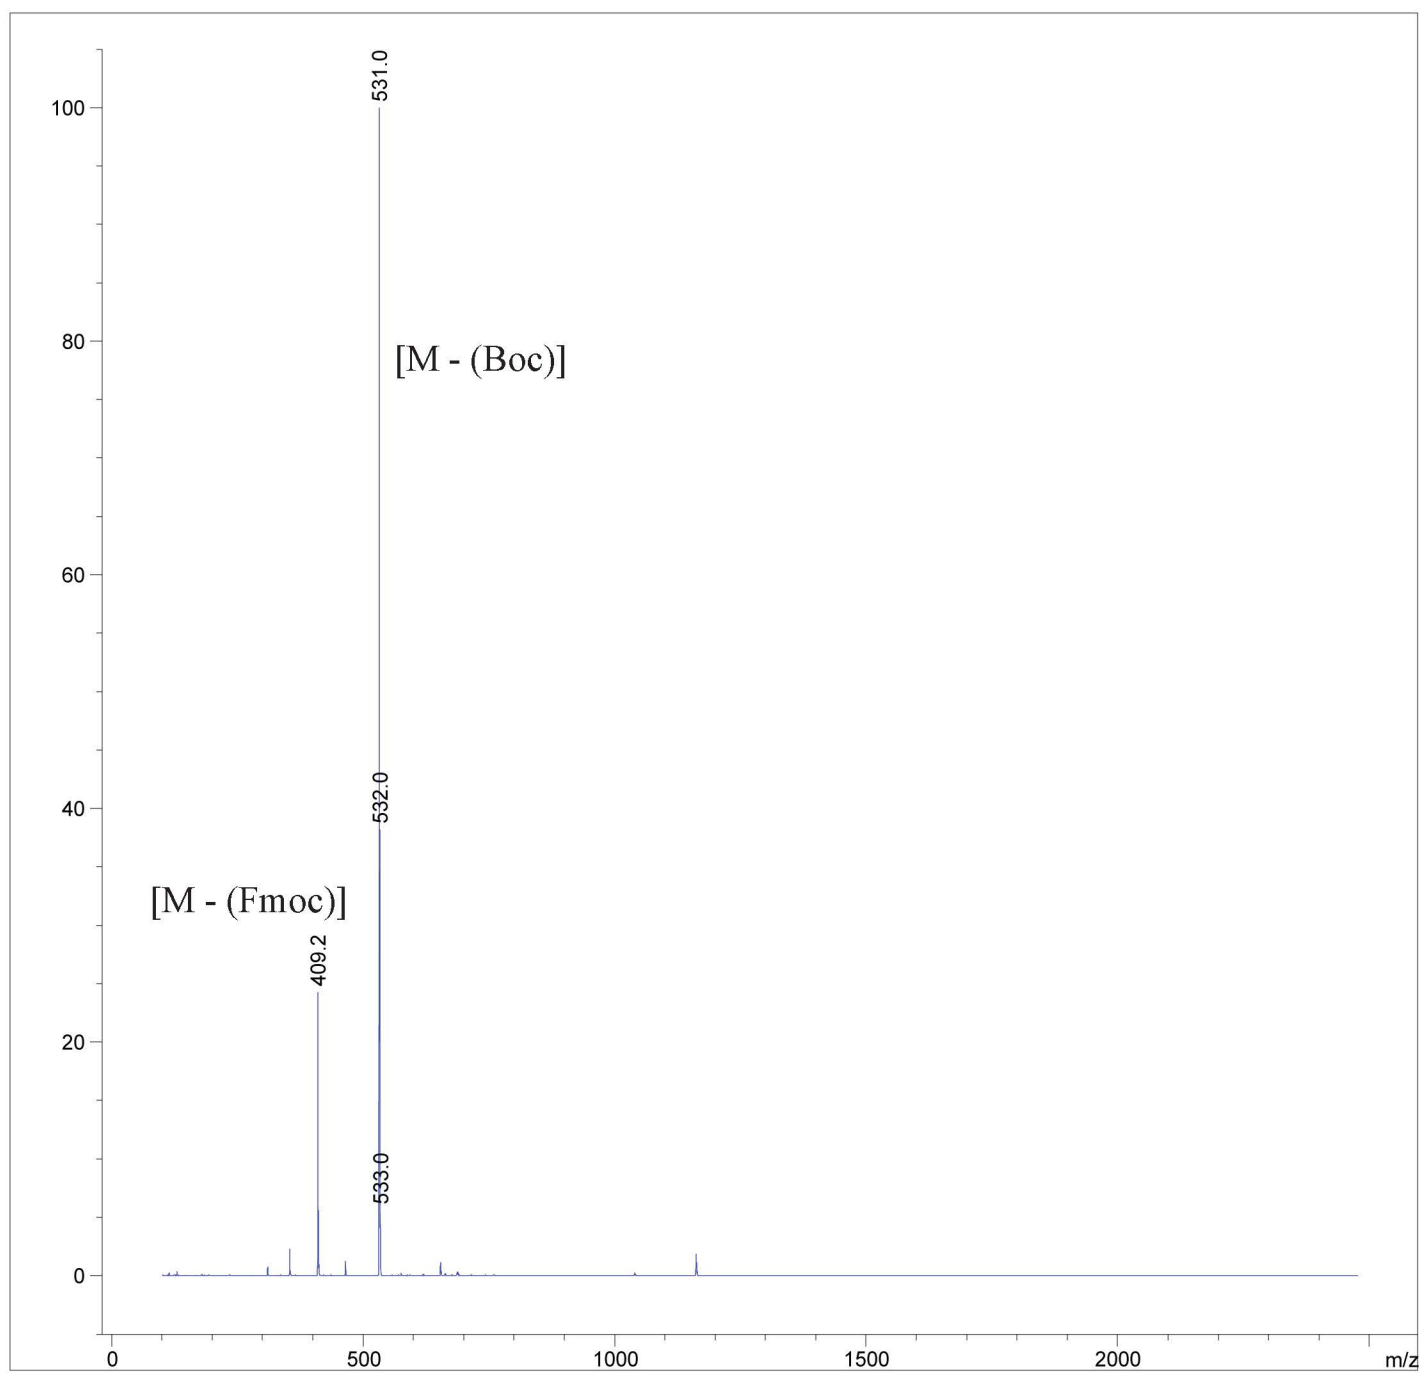

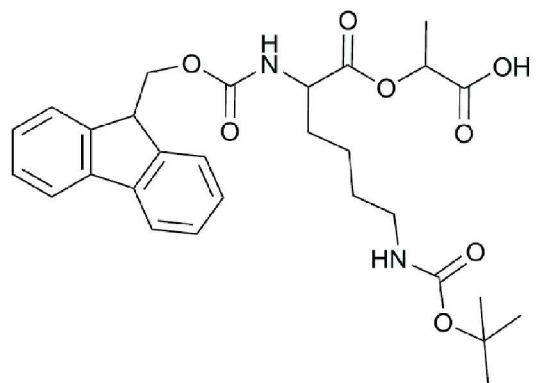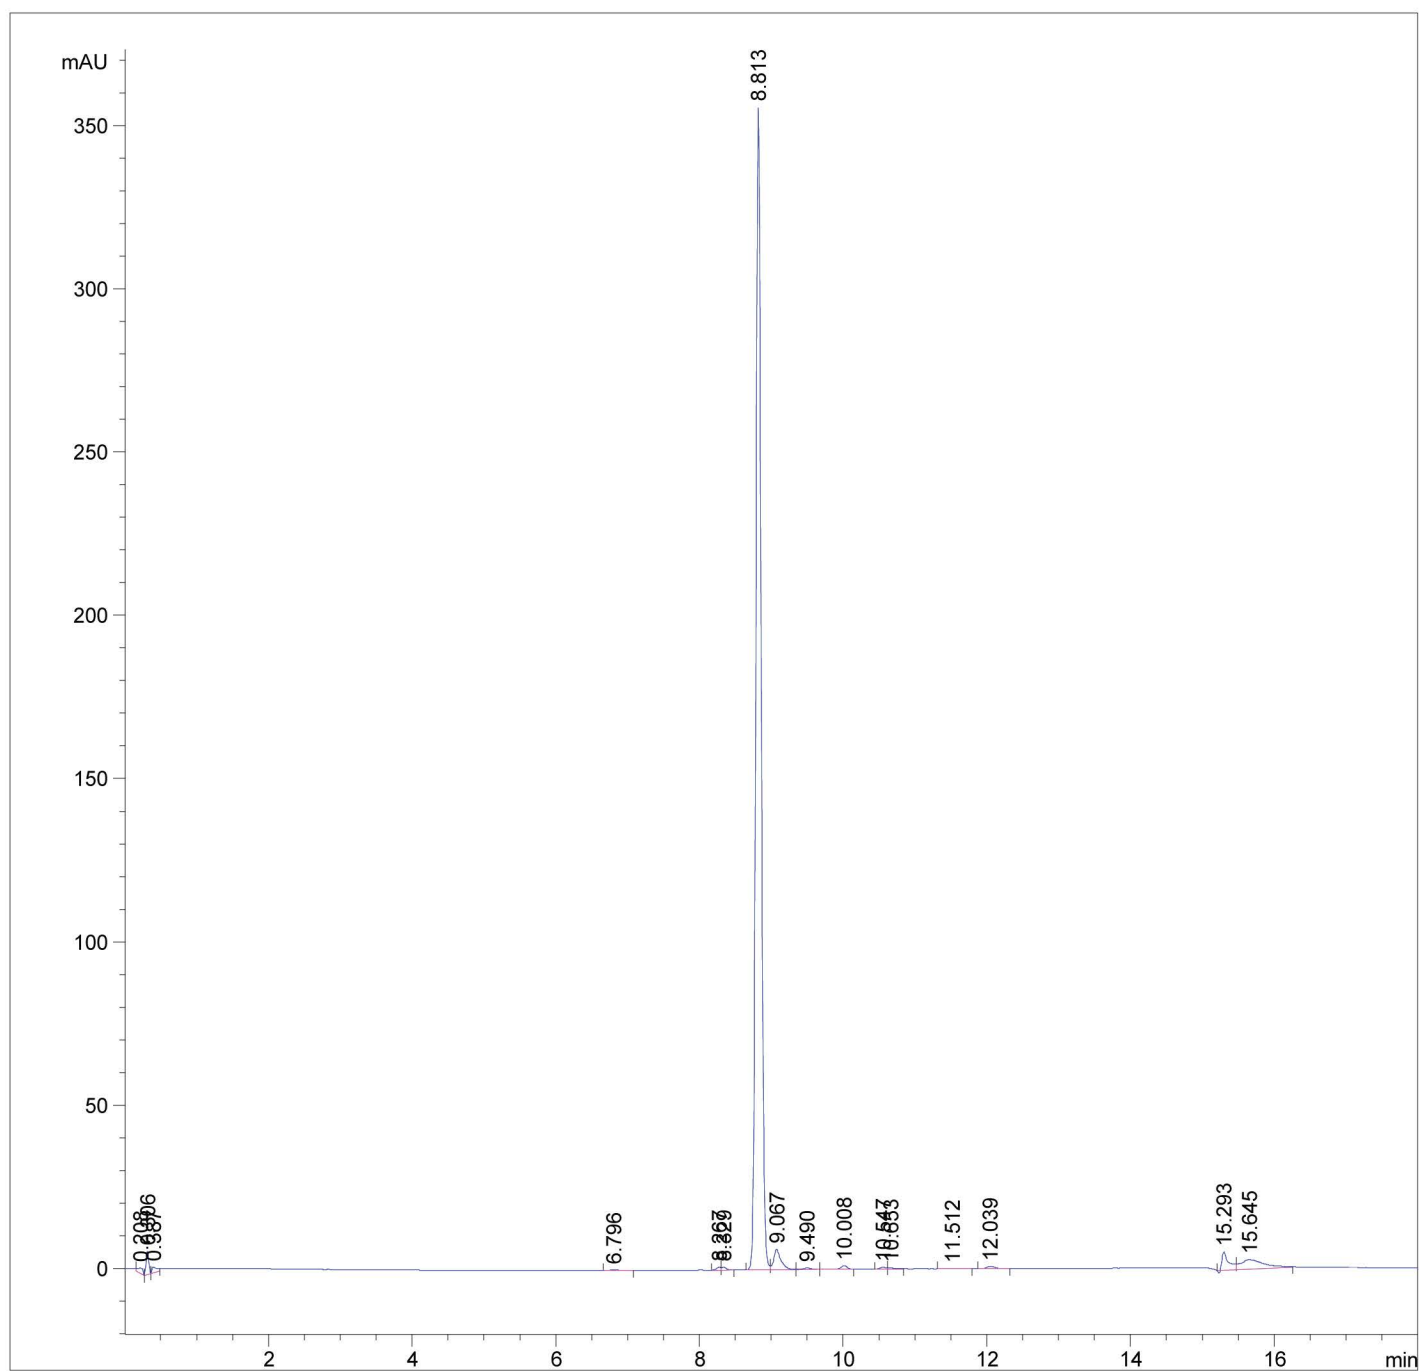

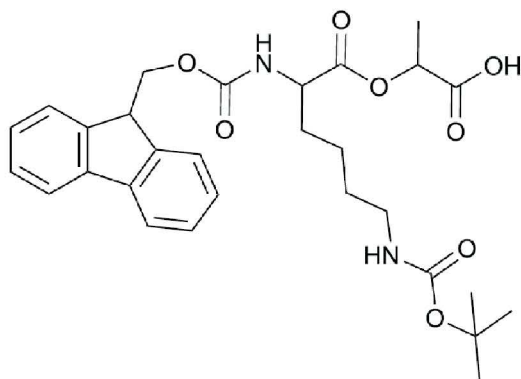

Molecular Weight: 540.60

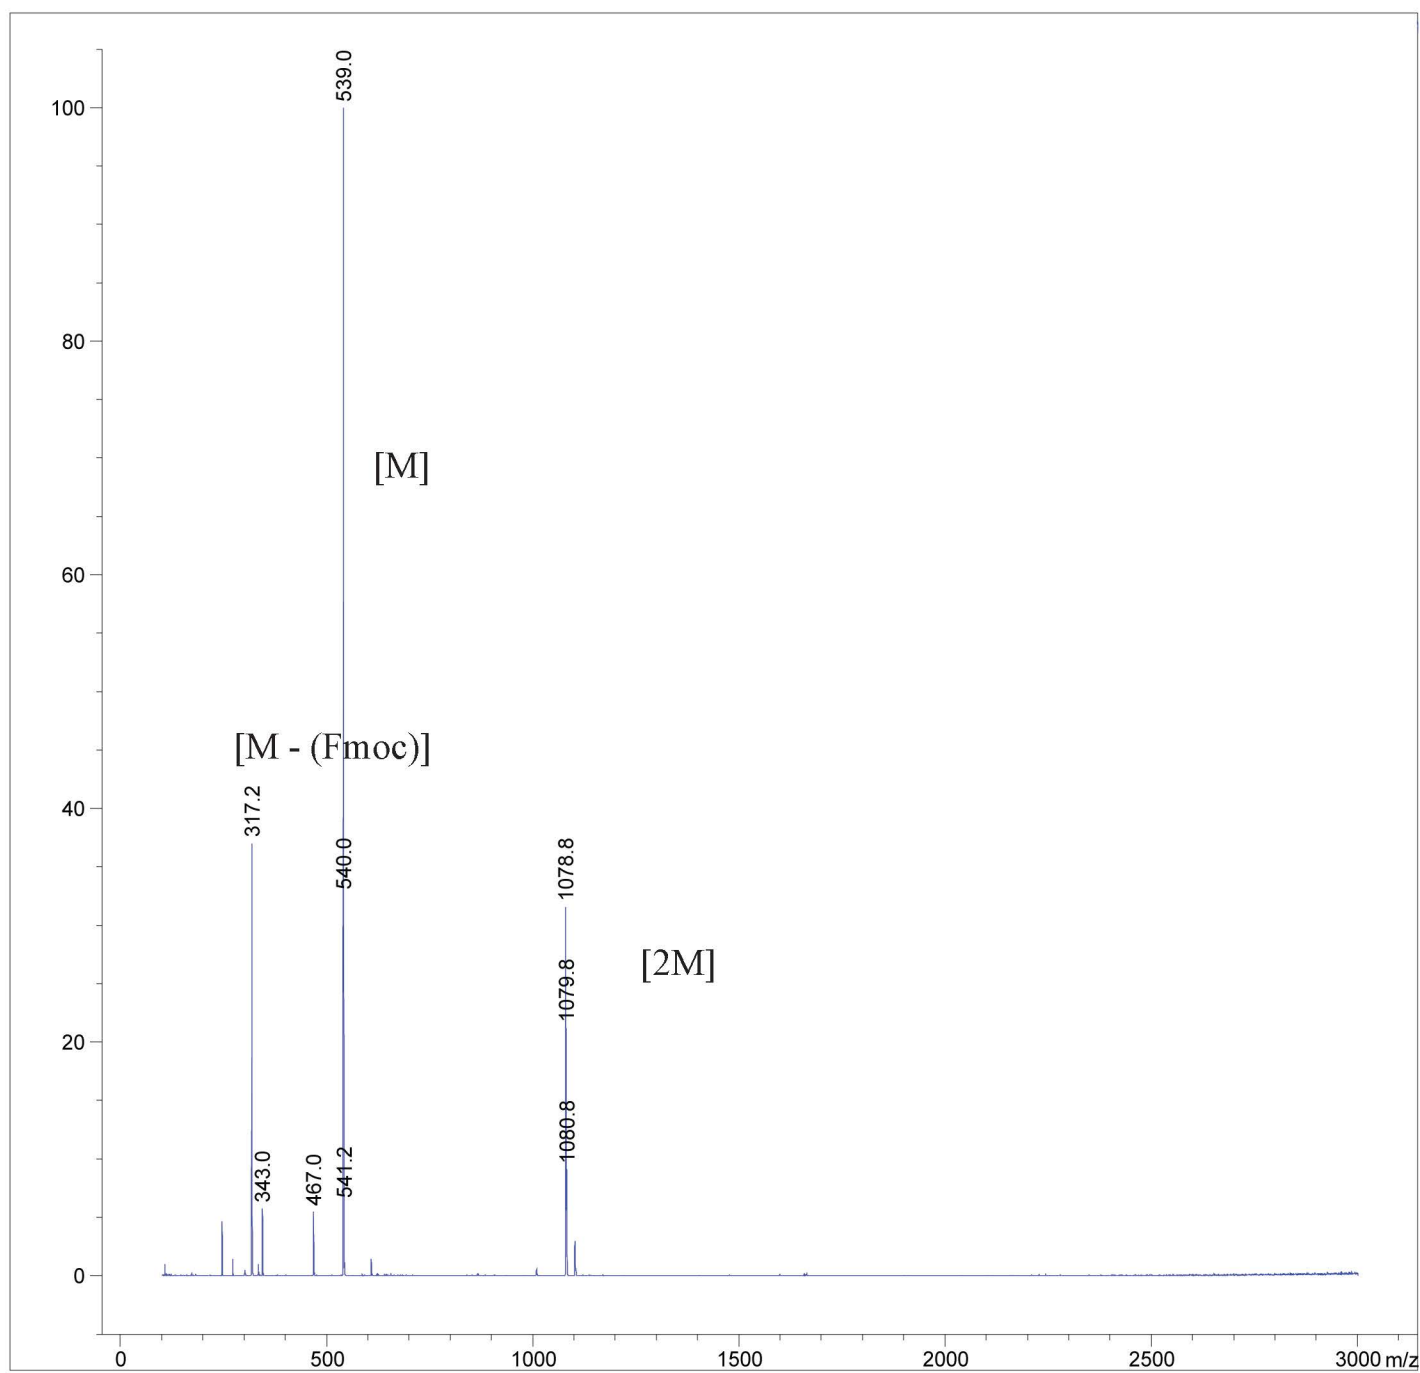

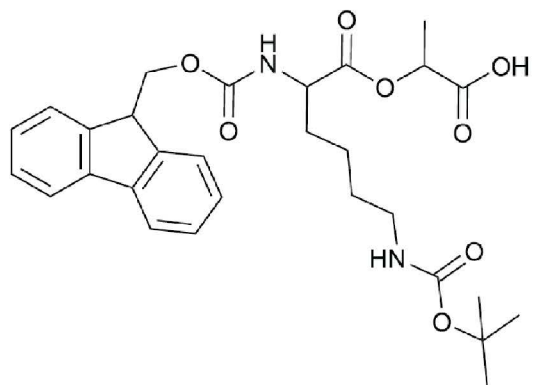

Molecular Weight: 540.60

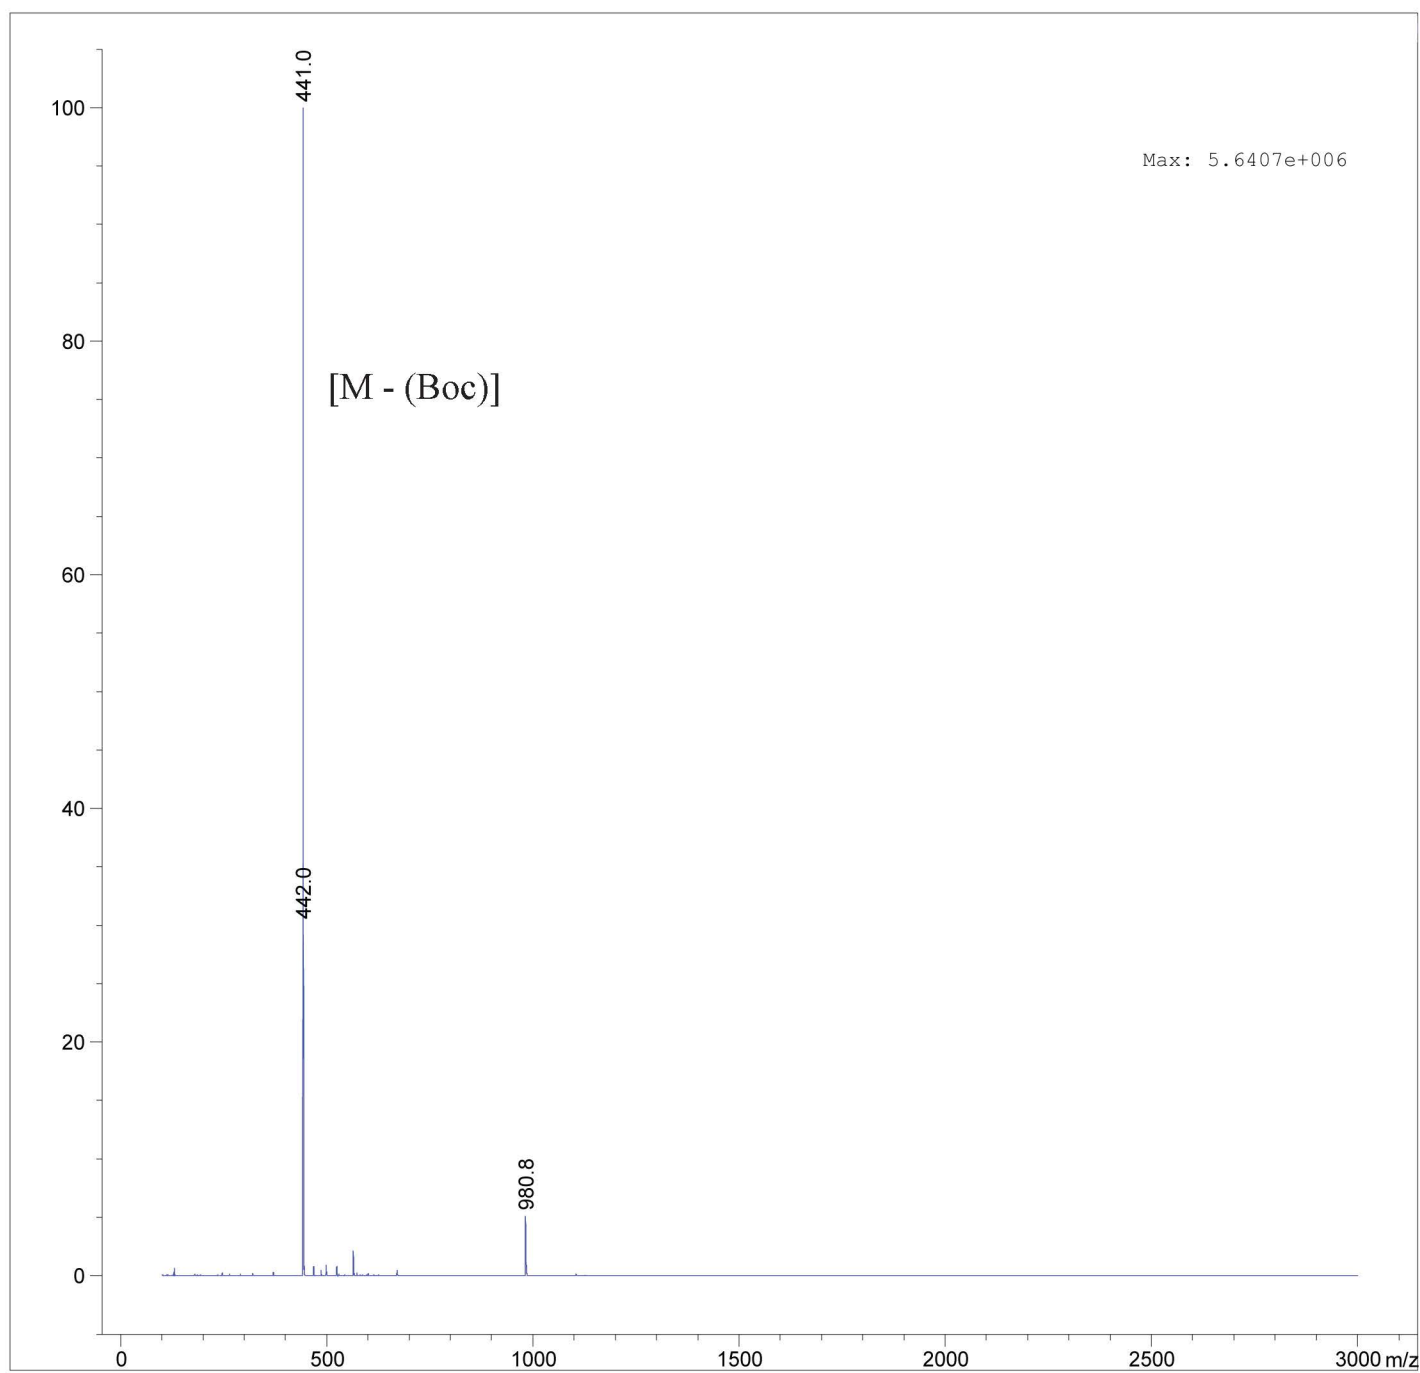

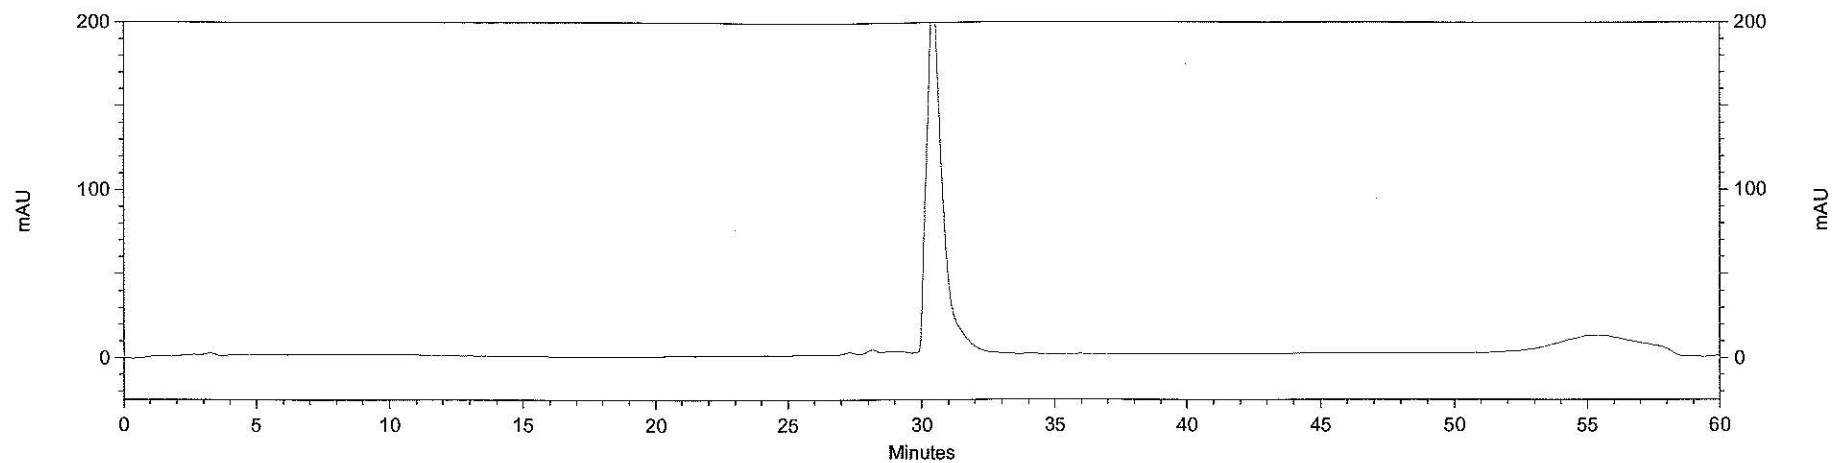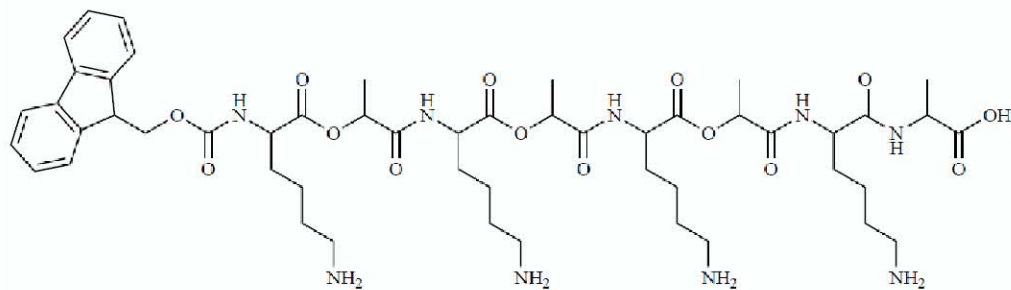

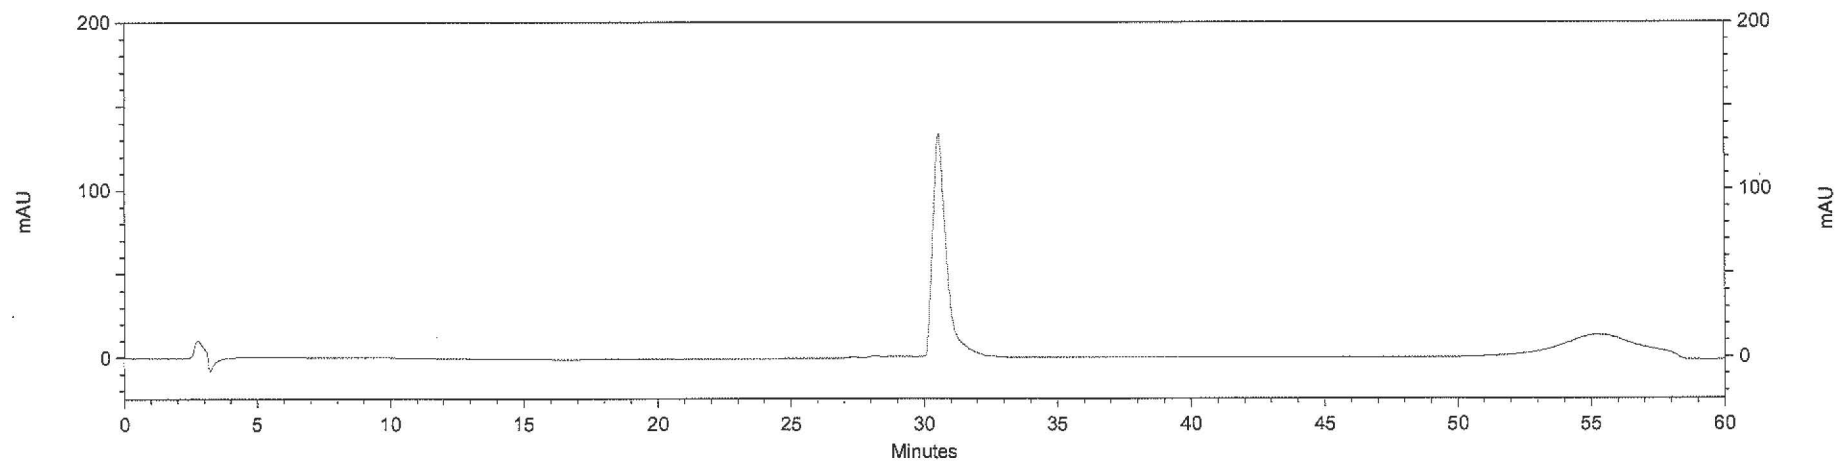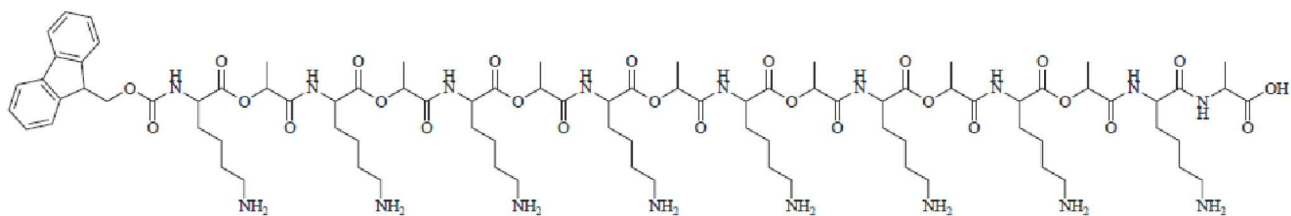



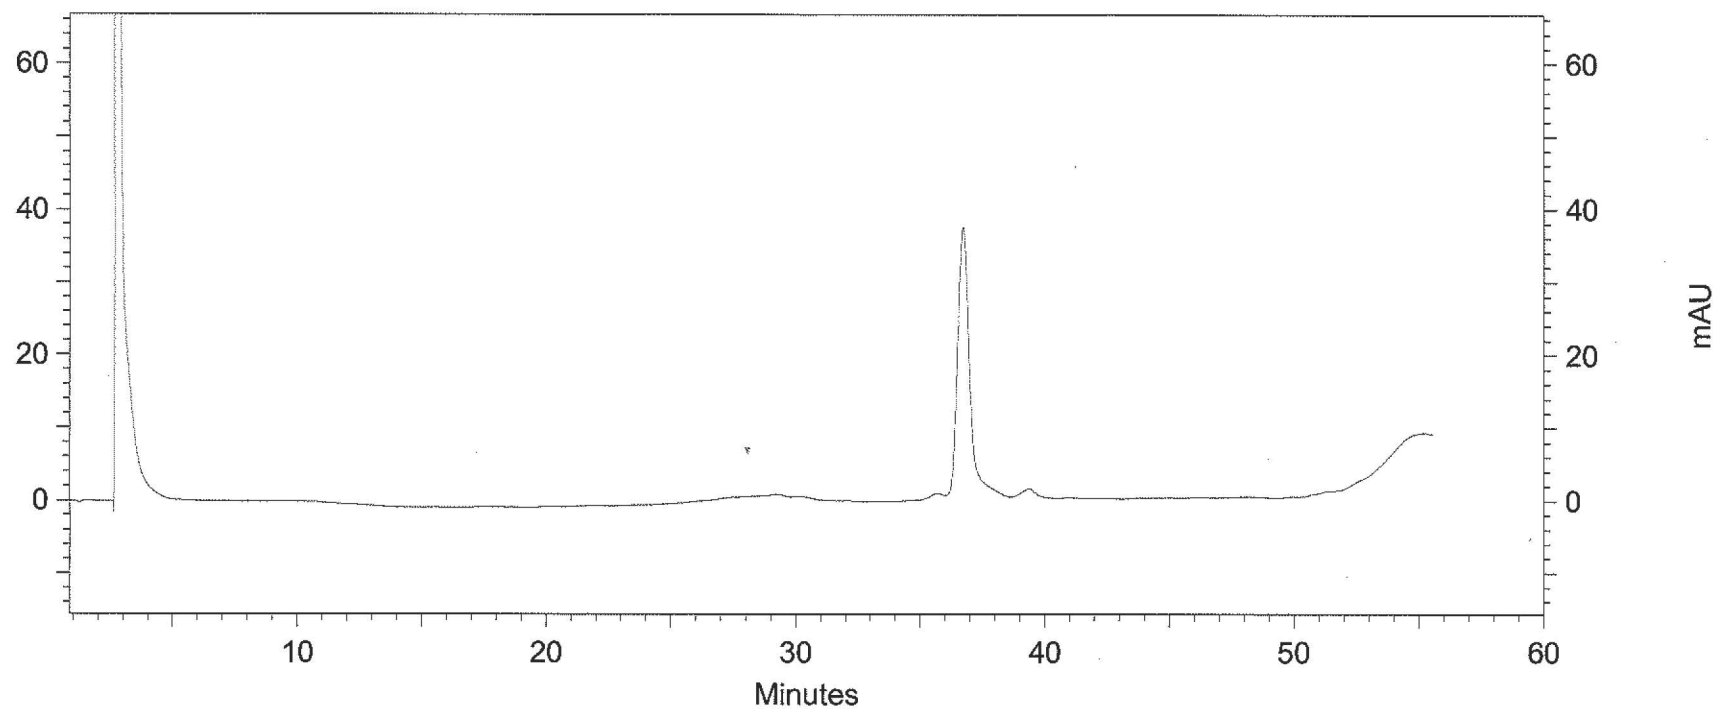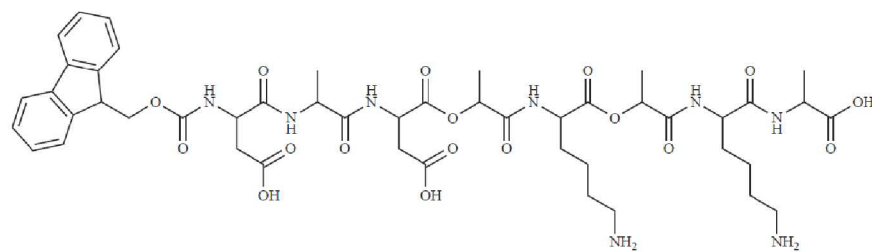

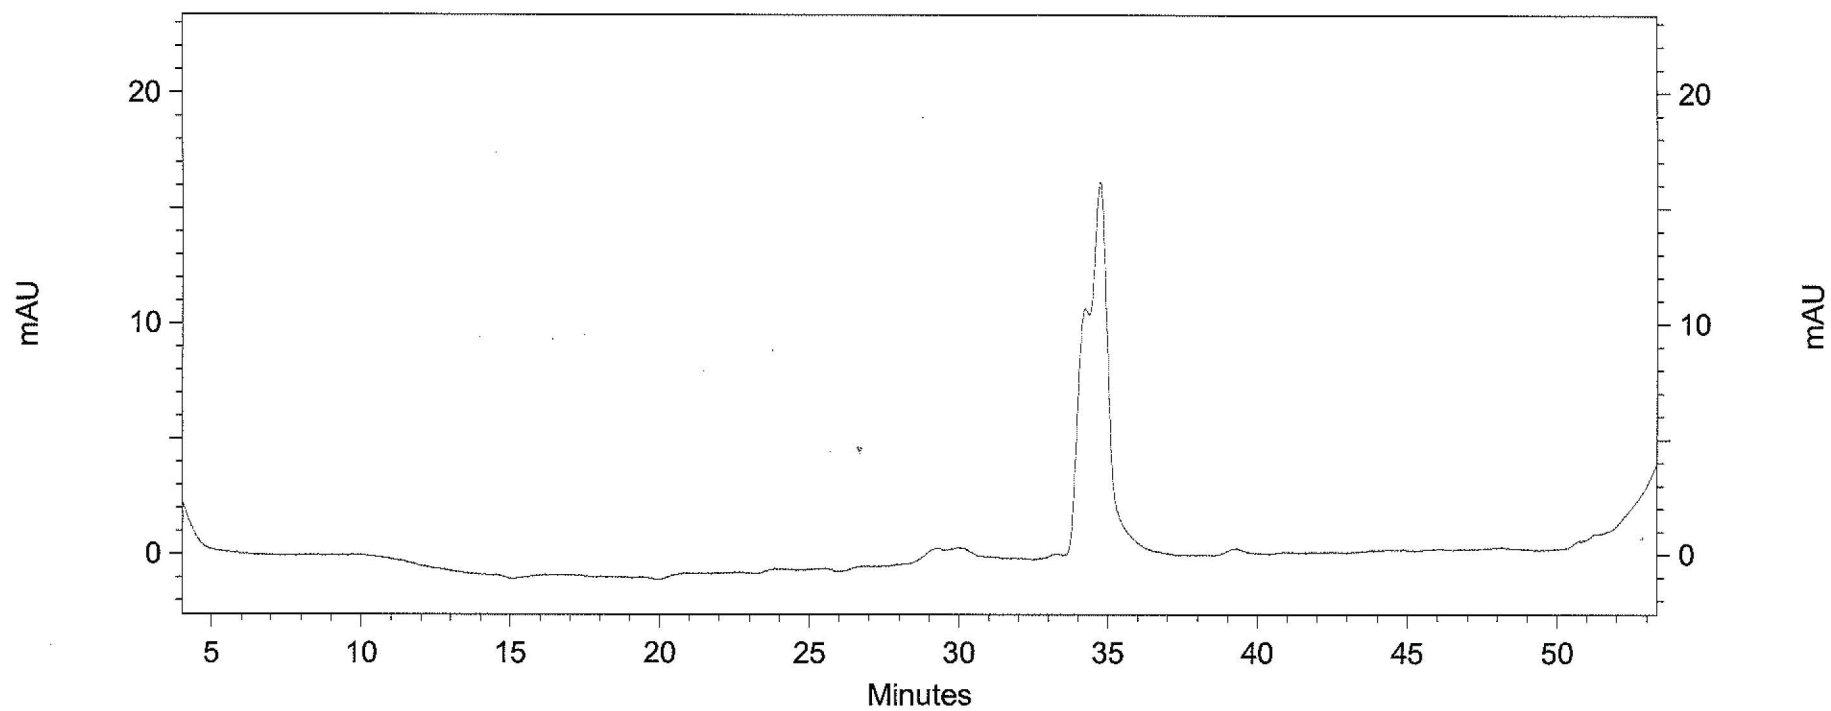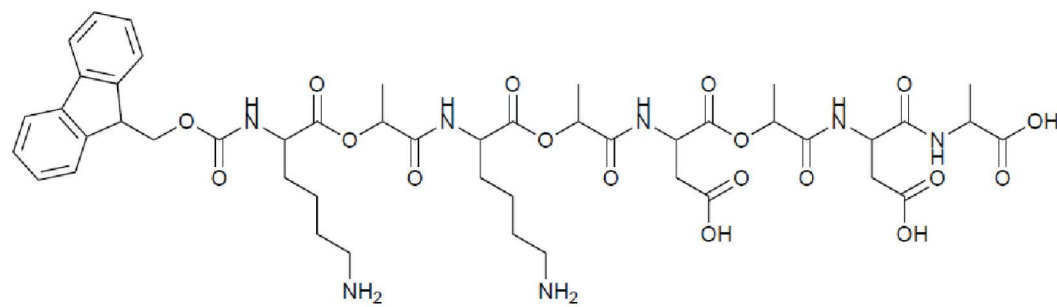

Supplement: c2ob26893k.pdf [file c2ob26893k.pdf]
